# Supplementary material for: Unraveling the Molecular Signature of Extracellular Vesicles From Endometrial-Derived Mesenchymal Stem Cells: Potential Modulatory Effects and Therapeutic Applications
Source: Front Bioeng Biotechnol. 2019 Dec 20;7:431. doi: 10.3389/fbioe.2019.00431 (PMC6932983; doi:10.3389/fbioe.2019.00431)
Supplement: Supplementary file 1 [file Table_1.XLSX]

## Sheet: Supp-Table_1
Supplementary Table 1. The EV-endMSCs proteome. Only proteins identified with 2 or more peptides (Np) were considered in this study (n=895). Relative abundance of each protein was estimated by means of the intensities of iTRAQ reporters used to tag the peptides of each sample. Reporter ion intensities of each protein were normalized to the total ion intensity of each sample dataset. Data are expr…									Total abundance in EV-endMSCs (%)
								Extracellular exosome (GO:0070062)	80.2582
								Others	16.2745
UniProt Accession	Protein Description	Symbol	Average of abundance in EV-endMSCs (%)	Np	ExoCarta (top-100)	Extracellular exosome (GO:0070062)
P02787	Serotransferrin	TF	35.0233	86		1
P08123	Collagen alpha-2(I) chain	COL1A2	3.03665	71		1
P02768	Serum albumin	ALB	2.68729	14	1	1
Q16270	Insulin-like growth factor-binding protein 7	IGFBP7	2.10621	16		1
P51884	Lumican	LUM	1.79553	18		1
Q99715	Collagen alpha-1(XII) chain	COL12A1	1.38032	103		1
P08670	Vimentin	VIM	1.22908	45		1
P16035	Metalloproteinase inhibitor 2	TIMP2	1.14407	21		1
Q12841	Follistatin-related protein 1	FSTL1	1.09744	20		1
Q08380	Galectin-3-binding protein	LGALS3BP	1.06513	23	1	1
P12814	Alpha-actinin-1	ACTN1	1.02977	53		1
P12109	Collagen alpha-1(VI) chain	COL6A1	0.848507	42		1
O43707	Alpha-actinin-4	ACTN4	0.82904	46	1	1
P07996	Thrombospondin-1	THBS1	0.752973	44	1	1
P35579	Myosin-9	MYH9	0.727598	120	1	1
P67936	Tropomyosin alpha-4 chain	TPM4	0.663412	22		1
Q15113	Procollagen C-endopeptidase enhancer 1	PCOLCE	0.646822	22		1
P12111	Collagen alpha-3(VI) chain	COL6A3	0.616059	94		1
P02790	Hemopexin	HPX	0.584127	27		1
P09871	Complement C1s subcomponent	C1S	0.568833	38		1
P01033	Metalloproteinase inhibitor 1	TIMP1	0.520892	9		1
P07737	Profilin-1	PFN1	0.448439	11	1	1
P01034	Cystatin-C	CST3	0.419903	10		1
P63104	14-3-3 protein zeta/delta	YWHAZ	0.408431	16	1	1
P68133	Actin, alpha skeletal muscle	ACTA1	0.406832	20		1
P18206	Vinculin	VCL	0.39704	59		1
P60709	Actin, cytoplasmic 1	ACTB	0.396592	15	1	1
Q16610	Extracellular matrix protein 1	ECM1	0.383447	25		1
P21333	Filamin-A	FLNA	0.383304	83	1	1
P04264	Keratin, type II cytoskeletal 1	KRT1	0.348947	26		1
O94985	Calsyntenin-1	CLSTN1	0.335834	34		1
P36955	Pigment epithelium-derived factor	SERPINF1	0.331202	15		1
Q02818	Nucleobindin-1	NUCB1	0.329518	30		1
P09382	Galectin-1	LGALS1	0.322759	8		1
P00736	Complement C1r subcomponent	C1R	0.295668	26		1
P16070	CD44 antigen	CD44	0.292107	8		1
Q9BUD6	Spondin-2	SPON2	0.28531	9		1
P23284	Peptidyl-prolyl cis-trans isomerase B	PPIB	0.280562	16		1
P06396	Gelsolin	GSN	0.270407	21		1
O14498	Immunoglobulin superfamily containing leucine-rich repeat protein	ISLR	0.262822	12		1
P01023	Alpha-2-macroglobulin	A2M	0.261128	47	1	1
P14543	Nidogen-1	NID1	0.254652	32		1
P20908	Collagen alpha-1(V) chain	COL5A1	0.241555	28		1
P62258	14-3-3 protein epsilon	YWHAE	0.230748	23	1	1
P07602	Prosaposin	PSAP	0.23021	19		1
P13645	Keratin, type I cytoskeletal 10	KRT10	0.221841	28		1
P62937	Peptidyl-prolyl cis-trans isomerase A	PPIA	0.210064	17	1	1
P41222	Prostaglandin-H2 D-isomerase	PTGDS	0.200014	10		1
Q15582	Transforming growth factor-beta-induced protein ig-h3	TGFBI	0.191909	29		1
P02751	Fibronectin	FN1	0.190073	49		1
Q08043	Alpha-actinin-3	ACTN3	0.185229	9		1
P06733	Alpha-enolase	ENO1	0.184453	28	1	1
Q99969	Retinoic acid receptor responder protein 2	RARRES2	0.175662	5		1
P07237	Protein disulfide-isomerase	P4HB	0.168045	27		1
P05155	Plasma protease C1 inhibitor	SERPING1	0.16783	18		1
Q562R1	Beta-actin-like protein 2	ACTBL2	0.167167	2		1
P07858	Cathepsin B	CTSB	0.165886	14		1
P05121	Plasminogen activator inhibitor 1	SERPINE1	0.165423	23		1
P26038	Moesin	MSN	0.1636	34	1	1
O00391	Sulfhydryl oxidase 1	QSOX1	0.16256	24		1
P12110	Collagen alpha-2(VI) chain	COL6A2	0.158878	16		1
P60174	Triosephosphate isomerase	TPI1	0.154043	12	1	1
P01857	Immunoglobulin heavy constant gamma 1	IGHG1	0.152761	10		1
P07195	L-lactate dehydrogenase B chain	LDHB	0.150518	16	1	1
P35527	Keratin, type I cytoskeletal 9	KRT9	0.14873	26		1
P11047	Laminin subunit gamma-1	LAMC1	0.142581	34		1
P31946	14-3-3 protein beta/alpha	YWHAB	0.140794	12	1	1
P0DP23	Calmodulin-1	CALM1	0.135668	12		1
P50395	Rab GDP dissociation inhibitor beta	GDI2	0.13059	27	1	1
P27797	Calreticulin	CALR	0.129999	17		1
P00338	L-lactate dehydrogenase A chain	LDHA	0.125206	17	1	1
P35908	Keratin, type II cytoskeletal 2 epidermal	KRT2	0.124905	13		1
P0C0L5	Complement C4-B	C4B	0.124311	47		1
P62987	Ubiquitin-60S ribosomal protein L40	UBA52	0.123468	7		1
P17661	Desmin	DES	0.123286	3		1
P02788	Lactotransferrin	LTF	0.122615	2		1
H0Y789	Metalloproteinase inhibitor 1 (Fragment)	TIMP1	0.121903	2		1
P11021	78 kDa glucose-regulated protein	HSPA5	0.119834	24	1	1
P23381	Tryptophan--tRNA ligase, cytoplasmic	WARS	0.113465	22		1
P35052	Glypican-1	GPC1	0.110639	15		1
P15311	Ezrin	EZR	0.110371	21	1	1
P29401	Transketolase	TKT	0.108718	21	1	1
P61916	Epididymal secretory protein E1	NPC2	0.107342	8		1
P07942	Laminin subunit beta-1	LAMB1	0.105127	43		1
P07339	Cathepsin D	CTSD	0.104842	19		1
O75369	Filamin-B	FLNB	0.103067	50		1
Q9BRK5	45 kDa calcium-binding protein	SDF4	0.10094	19		1
Q08431	Lactadherin	MFGE8	0.0999151	17	1	1
P61981	14-3-3 protein gamma	YWHAG	0.0976707	8	1	1
P07355	Annexin A2	ANXA2	0.0961594	22	1	1
P19022	Cadherin-2	CDH2	0.0893197	17		1
P10599	Thioredoxin	TXN	0.0873793	9		1
P60660	Myosin light polypeptide 6	MYL6	0.0858675	11		1
P04075	Fructose-bisphosphate aldolase A	ALDOA	0.0852154	13	1	1
O00468	Agrin	AGRN	0.0849593	35		1
P05067	Amyloid-beta A4 protein	APP	0.0847811	18		1
P17936	Insulin-like growth factor-binding protein 3	IGFBP3	0.0837993	5		1
P11142	Heat shock cognate 71 kDa protein	HSPA8	0.0825842	22	1	1
P23528	Cofilin-1	CFL1	0.079288	9	1	1
P61769	Beta-2-microglobulin	B2M	0.0777461	7		1
P30086	Phosphatidylethanolamine-binding protein 1	PEBP1	0.0765015	6		1
P35555	Fibrillin-1	FBN1	0.0757631	9		1
P40925	Malate dehydrogenase, cytoplasmic	MDH1	0.0754858	10		1
P98160	Basement membrane-specific heparan sulfate proteoglycan core protein	HSPG2	0.0744932	21		1
P35749	Myosin-11	MYH11	0.0739358	9		1
P14618	Pyruvate kinase PKM	PKM	0.0737713	28	1	1
P02765	Alpha-2-HS-glycoprotein	AHSG	0.0709502	4		1
P09211	Glutathione S-transferase P	GSTP1	0.0708553	11		1
P28838	Cytosol aminopeptidase	LAP3	0.0696206	25		1
P09936	Ubiquitin carboxyl-terminal hydrolase isozyme L1	UCHL1	0.069423	13		1
P50454	Serpin H1	SERPINH1	0.068951	15		1
Q06830	Peroxiredoxin-1	PRDX1	0.0688362	10	1	1
P19105	Myosin regulatory light chain 12A	MYL12A	0.0682853	10		1
P30101	Protein disulfide-isomerase A3	PDIA3	0.0667072	26		1
P41219	Peripherin	PRPH	0.0652536	3		1
P27348	14-3-3 protein theta	YWHAQ	0.064843	11	1	1
Q8NBJ4	Golgi membrane protein 1	GOLM1	0.0626302	14		1
Q6EMK4	Vasorin	VASN	0.0621524	8		1
P36222	Chitinase-3-like protein 1	CHI3L1	0.0594278	13		1
P01834	Immunoglobulin kappa constant	IGKC	0.0583565	6		1
P37802	Transgelin-2	TAGLN2	0.0578792	13		1
P60033	CD81 antigen	CD81	0.0555814	3	1	1
H0YDL9	Tetraspanin (Fragment)	CD81	0.0533623	2	1	1
Q99497	Protein/nucleic acid deglycase DJ-1	PARK7	0.0529061	9		1
Q7Z406	Myosin-14	MYH14	0.0527405	4		1
P06753	Tropomyosin alpha-3 chain	TPM3	0.0525346	10		1
Q9Y281	Cofilin-2	CFL2	0.052268	8		1
P22626	Heterogeneous nuclear ribonucleoproteins A2/B1	HNRNPA2B1	0.0515043	8		1
D6R904	Tropomyosin alpha-3 chain	TPM3	0.0479129	5		1
Q14118	Dystroglycan	DAG1	0.0478252	15		1
P35609	Alpha-actinin-2	ACTN2	0.0476352	3		1
P15531	Nucleoside diphosphate kinase A	NME1	0.047606	5		1
P33908	Mannosyl-oligosaccharide 1,2-alpha-mannosidase IA	MAN1A1	0.0475645	14		1
P04083	Annexin A1	ANXA1	0.0473012	14	1	1
P00558	Phosphoglycerate kinase 1	PGK1	0.0458039	13	1	1
P05156	Complement factor I	CFI	0.0457693	14		1
Q13740	CD166 antigen	ALCAM	0.0455542	17		1
P06744	Glucose-6-phosphate isomerase	GPI	0.0454623	18		1
Q02809	Procollagen-lysine,2-oxoglutarate 5-dioxygenase 1	PLOD1	0.0452691	18		1
O60361	Putative nucleoside diphosphate kinase	NME2P1	0.0448988	6		1
P35580	Myosin-10	MYH10	0.0446982	21		1
P26447	Protein S100-A4	S100A4	0.0445239	3		1
P06703	Protein S100-A6	S100A6	0.0445186	2		1
P35754	Glutaredoxin-1	GLRX	0.0444145	5		1
O14773	Tripeptidyl-peptidase 1	TPP1	0.0436096	11		1
Q14019	Coactosin-like protein	COTL1	0.0432553	7		1
P18669	Phosphoglycerate mutase 1	PGAM1	0.0425214	10		1
P08779	Keratin, type I cytoskeletal 16	KRT16	0.0425011	8		1
Q05707	Collagen alpha-1(XIV) chain	COL14A1	0.0424307	31		1
P13693	Translationally-controlled tumor protein	TPT1	0.0406134	10		1
Q9Y6C2	EMILIN-1	EMILIN1	0.0402119	17		1
P06865	Beta-hexosaminidase subunit alpha	HEXA	0.0395434	13		1
P15586	N-acetylglucosamine-6-sulfatase	GNS	0.03879	8		1
Q9Y536	Peptidyl-prolyl cis-trans isomerase A-like 4A	PPIAL4A	0.0383932	2		1
P55083	Microfibril-associated glycoprotein 4	MFAP4	0.0383793	5		1
P52565	Rho GDP-dissociation inhibitor 1	ARHGDIA	0.0383487	4		1
P40926	Malate dehydrogenase, mitochondrial	MDH2	0.0376219	14		1
P00441	Superoxide dismutase [Cu-Zn]	SOD1	0.0374203	5		1
P01861	Immunoglobulin heavy constant gamma 4	IGHG4	0.0371819	5		1
P07686	Beta-hexosaminidase subunit beta	HEXB	0.0371504	11		1
P16870	Carboxypeptidase E	CPE	0.0364383	15		1
P09972	Fructose-bisphosphate aldolase C	ALDOC	0.0363542	6		1
P07711	Cathepsin L1	CTSL	0.03627	8		1
P35237	Serpin B6	SERPINB6	0.0357027	18		1
Q86UD1	Out at first protein homolog	OAF	0.0351463	9		1
P55072	Transitional endoplasmic reticulum ATPase	VCP	0.0348941	23	1	1
Q16881	Thioredoxin reductase 1, cytoplasmic	TXNRD1	0.0342008	17		1
P04259	Keratin, type II cytoskeletal 6B	KRT6B	0.0341643	5		1
P22105	Tenascin-X	TNXB	0.0328592	26		1
P28066	Proteasome subunit alpha type-5	PSMA5	0.0324727	10		1
P55786	Puromycin-sensitive aminopeptidase	NPEPPS	0.0317896	20		1
P21810	Biglycan	BGN	0.0303437	13		1
Q9NR99	Matrix-remodeling-associated protein 5	MXRA5	0.0301783	22		1
P31949	Protein S100-A11	S100A11	0.0298287	4		1
P13929	Beta-enolase	ENO3	0.0296138	4		1
P04179	Superoxide dismutase [Mn], mitochondrial	SOD2	0.0293476	6		1
Q01518	Adenylyl cyclase-associated protein 1	CAP1	0.0292732	7		1
O60568	Procollagen-lysine,2-oxoglutarate 5-dioxygenase 3	PLOD3	0.0284841	10		1
P00352	Retinal dehydrogenase 1	ALDH1A1	0.0284327	20		1
P59998	Actin-related protein 2/3 complex subunit 4	ARPC4	0.0276864	5		1
P10909	Clusterin	CLU	0.0270736	5		1
P16188	HLA class I histocompatibility antigen, A-30 alpha chain	HLA-A	0.0267117	4		1
Q16363	Laminin subunit alpha-4	LAMA4	0.0264426	25		1
Q15904	V-type proton ATPase subunit S1	ATP6AP1	0.0261659	6		1
Q15149	Plectin	PLEC	0.0261521	39		1
P01024	Complement C3	C3	0.0260464	10		1
H0Y3Z3	Protein disulfide-isomerase (Fragment)	P4HB	0.0258195	4		1
Q14624	Inter-alpha-trypsin inhibitor heavy chain H4	ITIH4	0.0257386	8		1
P34096	Ribonuclease 4	RNASE4	0.0252415	4		1
P54802	Alpha-N-acetylglucosaminidase	NAGLU	0.0251563	13		1
P16949	Stathmin	STMN1	0.0250339	4		1
P06576	ATP synthase subunit beta, mitochondrial	ATP5B	0.0248186	14		1
P09603	Macrophage colony-stimulating factor 1	CSF1	0.0247901	8		1
P28799	Granulins	GRN	0.0245532	7		1
Q92743	Serine protease HTRA1	HTRA1	0.0240076	13		1
P17066	Heat shock 70 kDa protein 6	HSPA6	0.0239332	6		1
P05387	60S acidic ribosomal protein P2	RPLP2	0.023185	6		1
Q9HCU0	Endosialin	CD248	0.0231528	7		1
P13796	Plastin-2	LCP1	0.0230895	5		1
P13639	Elongation factor 2	EEF2	0.0226696	18	1	1
P37837	Transaldolase	TALDO1	0.0224663	8		1
Q9BTY2	Plasma alpha-L-fucosidase	FUCA2	0.0224642	7		1
Q9Y617	Phosphoserine aminotransferase	PSAT1	0.0221405	13		1
P48723	Heat shock 70 kDa protein 13	HSPA13	0.0215	13		1
Q9GZX9	Twisted gastrulation protein homolog 1	TWSG1	0.0214002	3		1
O60888	Protein CutA	CUTA	0.0212384	5		1
P18462	HLA class I histocompatibility antigen, A-25 alpha chain	HLA-A	0.0212115	6		1
Q969H8	Myeloid-derived growth factor	MYDGF	0.0210047	4		1
Q06481	Amyloid-like protein 2	APLP2	0.0205662	13		1
P32119	Peroxiredoxin-2	PRDX2	0.020257	5	1	1
Q06323	Proteasome activator complex subunit 1	PSME1	0.0201961	7		1
P04004	Vitronectin	VTN	0.0200321	2		1
P08238	Heat shock protein HSP 90-beta	HSP90AB1	0.0200014	10	1	1
Q15084	Protein disulfide-isomerase A6	PDIA6	0.0196158	9		1
P43251	Biotinidase	BTD	0.0194661	9		1
Q92820	Gamma-glutamyl hydrolase	GGH	0.0194308	8		1
P17931	Galectin-3	LGALS3	0.0194095	5		1
O43505	Beta-1,4-glucuronyltransferase 1	B4GAT1	0.0192987	8		1
P30530	Tyrosine-protein kinase receptor UFO	AXL	0.0191419	6		1
Q9UKU9	Angiopoietin-related protein 2	ANGPTL2	0.0190625	7		1
P08294	Extracellular superoxide dismutase [Cu-Zn]	SOD3	0.0189424	7		1
P07900	Heat shock protein HSP 90-alpha	HSP90AA1	0.0189179	12	1	1
P14649	Myosin light chain 6B	MYL6B	0.0186953	2		1
Q14651	Plastin-1	PLS1	0.0186809	3		1
P60842	Eukaryotic initiation factor 4A-I	EIF4A1	0.0186615	11		1
Q9Y696	Chloride intracellular channel protein 4	CLIC4	0.0184059	11		1
Q92626	Peroxidasin homolog	PXDN	0.0183189	20		1
P04080	Cystatin-B	CSTB	0.0180228	4		1
P55290	Cadherin-13	CDH13	0.0180101	6		1
P08603	Complement factor H	CFH	0.0180024	18		1
Q9BRK3	Matrix remodeling-associated protein 8	MXRA8	0.0179325	8		1
Q04760	Lactoylglutathione lyase	GLO1	0.0176223	7		1
P25788	Proteasome subunit alpha type-3	PSMA3	0.0175366	6		1
Q99584	Protein S100-A13	S100A13	0.0172693	5		1
P05556	Integrin beta-1	ITGB1	0.017221	12	1	1
Q9NZ08	Endoplasmic reticulum aminopeptidase 1	ERAP1	0.017115	16		1
P25789	Proteasome subunit alpha type-4	PSMA4	0.0170501	8		1
P13489	Ribonuclease inhibitor	RNH1	0.0168542	12		1
P20618	Proteasome subunit beta type-1	PSMB1	0.0168532	6		1
P80303	Nucleobindin-2	NUCB2	0.0166754	11		1
Q8N0Y7	Probable phosphoglycerate mutase 4	PGAM4	0.0165841	3		1
Q9H6X2	Anthrax toxin receptor 1	ANTXR1	0.0165419	6		1
P21589	5'-nucleotidase	NT5E	0.0161152	15		1
P14625	Endoplasmin	HSP90B1	0.016079	7		1
P20062	Transcobalamin-2	TCN2	0.0160366	7		1
O00584	Ribonuclease T2	RNASET2	0.0157447	6		1
Q9GZP0	Platelet-derived growth factor D	PDGFD	0.015636	6		1
P08133	Annexin A6	ANXA6	0.0155057	16	1	1
P30475	HLA class I histocompatibility antigen, B-39 alpha chain	HLA-B	0.0153111	6		1
Q9Y490	Talin-1	TLN1	0.0152975	26		1
P63241	Eukaryotic translation initiation factor 5A-1	EIF5A	0.0150845	4		1
O14818	Proteasome subunit alpha type-7	PSMA7	0.0150597	11		1
P68036	Ubiquitin-conjugating enzyme E2 L3	UBE2L3	0.015054	5		1
P01008	Antithrombin-III	SERPINC1	0.0149007	5		1
O75874	Isocitrate dehydrogenase [NADP] cytoplasmic	IDH1	0.0147406	12		1
P26641	Elongation factor 1-gamma	EEF1G	0.0147178	7		1
Q12907	Vesicular integral-membrane protein VIP36	LMAN2	0.0146958	5		1
P29966	Myristoylated alanine-rich C-kinase substrate	MARCKS	0.0137205	5		1
P07225	Vitamin K-dependent protein S	PROS1	0.0135783	5		1
P24592	Insulin-like growth factor-binding protein 6	IGFBP6	0.0134662	5		1
P62942	Peptidyl-prolyl cis-trans isomerase FKBP1A	FKBP1A	0.0133446	2		1
P42785	Lysosomal Pro-X carboxypeptidase	PRCP	0.0133009	5		1
P13473	Lysosome-associated membrane glycoprotein 2	LAMP2	0.0132719	3	1	1
P08758	Annexin A5	ANXA5	0.0131188	12	1	1
O00299	Chloride intracellular channel protein 1	CLIC1	0.0130945	7	1	1
Q13813	Spectrin alpha chain, non-erythrocytic 1	SPTAN1	0.0130669	24		1
Q09666	Neuroblast differentiation-associated protein AHNAK	AHNAK	0.0130598	19		1
P09619	Platelet-derived growth factor receptor beta	PDGFRB	0.0129972	8		1
P15259	Phosphoglycerate mutase 2	PGAM2	0.0129964	2		1
P11279	Lysosome-associated membrane glycoprotein 1	LAMP1	0.0127432	2		1
P46940	Ras GTPase-activating-like protein IQGAP1	IQGAP1	0.0122071	25		1
O75368	SH3 domain-binding glutamic acid-rich-like protein	SH3BGRL	0.0122044	4		1
P21291	Cysteine and glycine-rich protein 1	CSRP1	0.0121086	4		1
P05452	Tetranectin	CLEC3B	0.0118645	8		1
Q9NY33	Dipeptidyl peptidase 3	DPP3	0.0117854	13		1
P60900	Proteasome subunit alpha type-6	PSMA6	0.0116624	8		1
Q04446	1,4-alpha-glucan-branching enzyme	GBE1	0.0115496	9		1
P08174	Complement decay-accelerating factor	CD55	0.0114921	5		1
Q93063	Exostosin-2	EXT2	0.011429	14		1
P52907	F-actin-capping protein subunit alpha-1	CAPZA1	0.0113343	7		1
P22314	Ubiquitin-like modifier-activating enzyme 1	UBA1	0.011295	12	1	1
P07108	Acyl-CoA-binding protein	DBI	0.0112529	3		1
P15090	Fatty acid-binding protein, adipocyte	FABP4	0.011228	4		1
Q9UBR2	Cathepsin Z	CTSZ	0.0111407	5		1
P68363	Tubulin alpha-1B chain	TUBA1B	0.0110321	10	1	1
Q96TA1	Niban-like protein 1	FAM129B	0.0110163	7		1
Q09328	Alpha-1,6-mannosylglycoprotein 6-beta-N-acetylglucosaminyltransferase A	MGAT5	0.0109816	10		1
Q9BRA2	Thioredoxin domain-containing protein 17	TXNDC17	0.0108985	4		1
P15151	Poliovirus receptor	PVR	0.0107058	4		1
P61970	Nuclear transport factor 2	NUTF2	0.0107035	4		1
P53634	Dipeptidyl peptidase 1	CTSC	0.0104875	9		1
P02649	Apolipoprotein E	APOE	0.010367	8		1
P17900	Ganglioside GM2 activator	GM2A	0.0102828	4		1
P0DOY2	Immunoglobulin lambda constant 2	IGLC2	0.0102133	2		1
Q16658	Fascin	FSCN1	0.0101713	8		1
P60981	Destrin	DSTN	0.00999001	6		1
P19823	Inter-alpha-trypsin inhibitor heavy chain H2	ITIH2	0.00982287	3		1
Q99436	Proteasome subunit beta type-7	PSMB7	0.00976529	5		1
Q14974	Importin subunit beta-1	KPNB1	0.00970149	9	1	1
Q9UL46	Proteasome activator complex subunit 2	PSME2	0.00946935	7		1
Q7Z3B1	Neuronal growth regulator 1	NEGR1	0.00938929	2		1
P30455	HLA class I histocompatibility antigen, A-36 alpha chain	HLA-A	0.00930717	3		1
P48637	Glutathione synthetase	GSS	0.00926647	10		1
Q14112	Nidogen-2	NID2	0.00921971	10		1
P25786	Proteasome subunit alpha type-1	PSMA1	0.00917442	6		1
A0A024RA52	Proteasome subunit alpha type	PSMA2	0.00896644	7		1
Q9BWS9	Chitinase domain-containing protein 1	CHID1	0.00880006	4		1
P30504	HLA class I histocompatibility antigen, Cw-4 alpha chain	HLA-C	0.00879757	3		1
Q8NBS9	Thioredoxin domain-containing protein 5	TXNDC5	0.00861757	6		1
P00505	Aspartate aminotransferase, mitochondrial	GOT2	0.00846057	5		1
P06681	Complement C2	C2	0.00843898	10		1
P02774	Vitamin D-binding protein	GC	0.00842817	4		1
O95336	6-phosphogluconolactonase	PGLS	0.00841595	7		1
Q8NFZ8	Cell adhesion molecule 4	CADM4	0.00839125	3		1
P13686	Tartrate-resistant acid phosphatase type 5	ACP5	0.0082821	3		1
P08962	CD63 antigen	CD63	0.00827915	2	1	1
P24043	Laminin subunit alpha-2	LAMA2	0.00822955	13		1
Q9H4A4	Aminopeptidase B	RNPEP	0.00822443	7		1
P30085	UMP-CMP kinase	CMPK1	0.00821657	6		1
Q10588	ADP-ribosyl cyclase/cyclic ADP-ribose hydrolase 2	BST1	0.00816838	6		1
P07954	Fumarate hydratase, mitochondrial	FH	0.00797192	7		1
P20742	Pregnancy zone protein	PZP	0.00792661	3		1
Q14847	LIM and SH3 domain protein 1	LASP1	0.00776539	4		1
P61158	Actin-related protein 3	ACTR3	0.00763682	8		1
P01859	Immunoglobulin heavy constant gamma 2	IGHG2	0.00759968	2		1
P30044	Peroxiredoxin-5, mitochondrial	PRDX5	0.00748622	6		1
P07205	Phosphoglycerate kinase 2	PGK2	0.00748537	2		1
P09960	Leukotriene A-4 hydrolase	LTA4H	0.0074613	11		1
H0YDD8	60S acidic ribosomal protein P2 (Fragment)	RPLP2	0.00744662	2		1
P34932	Heat shock 70 kDa protein 4	HSPA4	0.00742924	14		1
A0A0A0MT20	EMILIN-1 (Fragment)	EMILIN1	0.00720291	2		1
Q16555	Dihydropyrimidinase-related protein 2	DPYSL2	0.00718469	10		1
P00751	Complement factor B	CFB	0.00698481	6		1
P52209	6-phosphogluconate dehydrogenase, decarboxylating	PGD	0.00685244	6		1
P16152	Carbonyl reductase [NADPH] 1	CBR1	0.006847	8		1
Q9UNN8	Endothelial protein C receptor	PROCR	0.00680004	2		1
P12955	Xaa-Pro dipeptidase	PEPD	0.00675766	6		1
Q14247	Src substrate cortactin	CTTN	0.00668949	2		1
O75882	Attractin	ATRN	0.00668099	9		1
Q9NRA1	Platelet-derived growth factor C	PDGFC	0.00651924	4		1
O15144	Actin-related protein 2/3 complex subunit 2	ARPC2	0.00649712	10		1
P30050	60S ribosomal protein L12	RPL12	0.00638129	4		1
Q9H299	SH3 domain-binding glutamic acid-rich-like protein 3	SH3BGRL3	0.00636583	3		1
Q9Y2E5	Epididymis-specific alpha-mannosidase	MAN2B2	0.00635682	5		1
Q99988	Growth/differentiation factor 15	GDF15	0.00634887	3		1
Q9Y646	Carboxypeptidase Q	CPQ	0.00633885	8		1
A0A0A0MTI5	Acyl-CoA-binding protein	DBI	0.00619215	2		1
O95865	N(G),N(G)-dimethylarginine dimethylaminohydrolase 2	DDAH2	0.00615424	6		1
P49720	Proteasome subunit beta type-3	PSMB3	0.00602154	5		1
P04216	Thy-1 membrane glycoprotein	THY1	0.00596088	3		1
P05386	60S acidic ribosomal protein P1	RPLP1	0.00592873	5		1
Q01469	Fatty acid-binding protein, epidermal	FABP5	0.00589525	2		1
A0A0A0MRU5	Ceroid-lipofuscinosis neuronal protein 5	CLN5	0.0058943	7		1
P47755	F-actin-capping protein subunit alpha-2	CAPZA2	0.00587345	4		1
P04792	Heat shock protein beta-1	HSPB1	0.00586495	3		1
P62857	40S ribosomal protein S28	RPS28	0.00584214	2		1
P31431	Syndecan-4	SDC4	0.00580317	3		1
P11766	Alcohol dehydrogenase class-3	ADH5	0.00579724	6		1
Q92692	Nectin-2	NECTIN2	0.00574412	4		1
Q10471	Polypeptide N-acetylgalactosaminyltransferase 2	GALNT2	0.00567314	6		1
P69905	Hemoglobin subunit alpha	HBA1	0.00564905	3		1
P02533	Keratin, type I cytoskeletal 14	KRT14	0.00559666	6		1
P80723	Brain acid soluble protein 1	BASP1	0.00559664	3		1
P61160	Actin-related protein 2	ACTR2	0.00558625	10		1
P28070	Proteasome subunit beta type-4	PSMB4	0.00558377	6		1
A0A087WXW9	Collagen alpha-1(V) chain	COL5A1	0.00557357	3		1
Q9NZN4	EH domain-containing protein 2	EHD2	0.00551853	6		1
P63208	S-phase kinase-associated protein 1	SKP1	0.0055114	4		1
Q01459	Di-N-acetylchitobiase	CTBS	0.00546663	7		1
Q92520	Protein FAM3C	FAM3C	0.00542673	4		1
P04406	Glyceraldehyde-3-phosphate dehydrogenase	GAPDH	0.00541095	6	1	1
P38159	RNA-binding motif protein, X chromosome	RBMX	0.00534498	3		1
P34059	N-acetylgalactosamine-6-sulfatase	GALNS	0.00528447	5		1
Q15404	Ras suppressor protein 1	RSU1	0.00523768	6		1
P05362	Intercellular adhesion molecule 1	ICAM1	0.00523546	5		1
Q9BYX7	Putative beta-actin-like protein 3	POTEKP	0.00519497	2		1
P30041	Peroxiredoxin-6	PRDX6	0.00518865	4		1
Q01082	Spectrin beta chain, non-erythrocytic 1	SPTBN1	0.0051843	7		1
O75347	Tubulin-specific chaperone A	TBCA	0.00517306	5		1
Q96KP4	Cytosolic non-specific dipeptidase	CNDP2	0.00517069	11		1
P04156	Major prion protein	PRNP	0.00516443	2		1
P28065	Proteasome subunit beta type-9	PSMB9	0.00513295	4		1
O75436	Vacuolar protein sorting-associated protein 26A	VPS26A	0.00502981	6		1
P47756	F-actin-capping protein subunit beta	CAPZB	0.00500485	4		1
P17655	Calpain-2 catalytic subunit	CAPN2	0.0049105	6		1
P78417	Glutathione S-transferase omega-1	GSTO1	0.00473436	6		1
A6NMY6	Putative annexin A2-like protein	ANXA2P2	0.00468082	2		1
Q16531	DNA damage-binding protein 1	DDB1	0.00465588	11		1
Q8NHP8	Putative phospholipase B-like 2	PLBD2	0.00453972	7		1
Q6UVK1	Chondroitin sulfate proteoglycan 4	CSPG4	0.00453515	11		1
P68104	Elongation factor 1-alpha 1	EEF1A1	0.00452878	8	1	1
P08572	Collagen alpha-2(IV) chain	COL4A2	0.004525	7		1
P23142	Fibulin-1	FBLN1	0.0044189	8		1
P15291	Beta-1,4-galactosyltransferase 1	B4GALT1	0.00440305	4		1
K7EM49	6-phosphogluconate dehydrogenase, decarboxylating (Fragment)	PGD	0.00431298	2		1
Q9UNW1	Multiple inositol polyphosphate phosphatase 1	MINPP1	0.00417098	5		1
Q9UBQ6	Exostosin-like 2	EXTL2	0.00415709	5		1
P45877	Peptidyl-prolyl cis-trans isomerase C	PPIC	0.00413644	2		1
P19021	Peptidyl-glycine alpha-amidating monooxygenase	PAM	0.00413395	5		1
O00560	Syntenin-1	SDCBP	0.00411459	4	1	1
G5EA09	Syndecan binding protein (Syntenin), isoform CRA	SDCBP	0.00411459	4	1	1
P10253	Lysosomal alpha-glucosidase	GAA	0.00410093	7		1
Q8N114	Protein shisa-5	SHISA5	0.00407792	2		1
P04632	Calpain small subunit 1	CAPNS1	0.00404788	6		1
K7EKE8	Nectin-2 (Fragment)	NECTIN2	0.00402718	2		1
P12004	Proliferating cell nuclear antigen	PCNA	0.00401883	4		1
Q9Y5Z4	Heme-binding protein 2	HEBP2	0.00398081	2		1
O15230	Laminin subunit alpha-5	LAMA5	0.00394339	9		1
P20933	N(4)-(beta-N-acetylglucosaminyl)-L-asparaginase	AGA	0.00393517	4		1
Q6IBS0	Twinfilin-2	TWF2	0.00382425	3		1
Q8WVQ1	Soluble calcium-activated nucleotidase 1	CANT1	0.00380024	6		1
P14550	Alcohol dehydrogenase [NADP(+)]	AKR1A1	0.00379655	8		1
P19338	Nucleolin	NCL	0.00368515	8		1
P55287	Cadherin-11	CDH11	0.0036623	3		1
P46108	Adapter molecule crk	CRK	0.00365088	3		1
P27816	Microtubule-associated protein 4	MAP4	0.00364827	6		1
P58546	Myotrophin	MTPN	0.0035761	3		1
P30479	HLA class I histocompatibility antigen, B-41 alpha chain	HLA-B	0.00356141	2		1
P61604	10 kDa heat shock protein, mitochondrial	HSPE1	0.00352296	2		1
Q14914	Prostaglandin reductase 1	PTGR1	0.00352077	7		1
P51688	N-sulphoglucosamine sulphohydrolase	SGSH	0.00351643	4		1
P35241	Radixin	RDX	0.00348055	9		1
P13646	Keratin, type I cytoskeletal 13	KRT13	0.00343091	2		1
Q9UHL4	Dipeptidyl peptidase 2	DPP7	0.00339927	4		1
P07384	Calpain-1 catalytic subunit	CAPN1	0.00334595	7		1
Q15257	Serine/threonine-protein phosphatase 2A activator	PTPA	0.00329661	3		1
Q15274	Nicotinate-nucleotide pyrophosphorylase [carboxylating]	QPRT	0.003202	4		1
P28062	Proteasome subunit beta type-8	PSMB8	0.00314032	4		1
O14672	Disintegrin and metalloproteinase domain-containing protein 10	ADAM10	0.00308599	4		1
P15289	Arylsulfatase A	ARSA	0.0030721	6		1
Q99439	Calponin-2	CNN2	0.00306054	2		1
Q9BQ51	Programmed cell death 1 ligand 2	PDCD1LG2	0.0029109	2		1
Q16851	UTP--glucose-1-phosphate uridylyltransferase	UGP2	0.00282087	5		1
P46926	Glucosamine-6-phosphate isomerase 1	GNPDA1	0.00281484	3		1
P62805	Histone H4	HIST1H4A	0.00280826	4	1	1
P10619	Lysosomal protective protein	CTSA	0.00278685	3		1
E7EVA0	Microtubule-associated protein	MAP4	0.00277881	3		1
P21926	CD9 antigen	CD9	0.00273574	2	1	1
Q9Y287	Integral membrane protein 2B	ITM2B	0.00270518	3		1
Q92688	Acidic leucine-rich nuclear phosphoprotein 32 family member B	ANP32B	0.00263748	3		1
P43034	Platelet-activating factor acetylhydrolase IB subunit alpha	PAFAH1B1	0.00263693	3		1
Q04917	14-3-3 protein eta	YWHAH	0.00263188	4	1	1
H0Y983	Cytosol aminopeptidase (Fragment)	LAP3	0.00263078	2		1
P16190	HLA class I histocompatibility antigen, A-33 alpha chain	HLA-A	0.00262894	2		1
Q07960	Rho GTPase-activating protein 1	ARHGAP1	0.00258122	6		1
O00115	Deoxyribonuclease-2-alpha	DNASE2	0.00256099	2		1
P05154	Plasma serine protease inhibitor	SERPINA5	0.00255004	5		1
Q16778	Histone H2B type 2-E	HIST2H2BE	0.00250738	2		1
A0A1C7CYX9	Dihydropyrimidinase-related protein 2	DPYSL2	0.00248796	2		1
P13798	Acylamino-acid-releasing enzyme	APEH	0.0024134	5		1
P04066	Tissue alpha-L-fucosidase	FUCA1	0.0024103	3		1
O15031	Plexin-B2	PLXNB2	0.00235793	7		1
Q07812	Apoptosis regulator BAX	BAX	0.00233469	3		1
Q9Y4L1	Hypoxia up-regulated protein 1	HYOU1	0.00233369	5		1
Q9BS26	Endoplasmic reticulum resident protein 44	ERP44	0.00233352	4		1
P15144	Aminopeptidase N	ANPEP	0.00230178	6		1
Q8WUM4	Programmed cell death 6-interacting protein	PDCD6IP	0.00224838	8	1	1
Q15907	Ras-related protein Rab-11B	RAB11B	0.00220731	2		1
O75787	Renin receptor	ATP6AP2	0.00219412	3		1
P13647	Keratin, type II cytoskeletal 5	KRT5	0.00219066	3		1
P11717	Cation-independent mannose-6-phosphate receptor	IGF2R	0.00217686	7		1
Q13867	Bleomycin hydrolase	BLMH	0.00215595	2		1
Q00888	Pregnancy-specific beta-1-glycoprotein 4	PSG4	0.00215514	3		1
O94760	N(G),N(G)-dimethylarginine dimethylaminohydrolase 1	DDAH1	0.00211922	5		1
Q9HC38	Glyoxalase domain-containing protein 4	GLOD4	0.00211599	4		1
P61978	Heterogeneous nuclear ribonucleoprotein K	HNRNPK	0.00210408	5		1
P30046	D-dopachrome decarboxylase	DDT	0.00209555	2		1
Q13510	Acid ceramidase	ASAH1	0.00208359	4		1
P15121	Aldose reductase	AKR1B1	0.00207481	2		1
Q9NZP8	Complement C1r subcomponent-like protein	C1RL	0.00205516	2		1
Q96FW1	Ubiquitin thioesterase OTUB1	OTUB1	0.00201731	6		1
P17174	Aspartate aminotransferase, cytoplasmic	GOT1	0.00198773	5		1
P10809	60 kDa heat shock protein, mitochondrial	HSPD1	0.00198575	6		1
P54819	Adenylate kinase 2, mitochondrial	AK2	0.00197329	4		1
P61204	ADP-ribosylation factor 3	ARF3	0.00194055	3		1
Q8WVN6	Secreted and transmembrane protein 1	SECTM1	0.00193947	2		1
P05388	60S acidic ribosomal protein P0	RPLP0	0.00193038	3		1
P00746	Complement factor D	CFD	0.00193024	3		1
P53396	ATP-citrate synthase	ACLY	0.00190177	6	1	1
Q58FF7	Putative heat shock protein HSP 90-beta-3	HSP90AB3P	0.00188281	3		1
P21980	Protein-glutamine gamma-glutamyltransferase 2	TGM2	0.00185526	4		1
P17050	Alpha-N-acetylgalactosaminidase	NAGA	0.00183668	2		1
Q9UBX5	Fibulin-5	FBLN5	0.00183441	4		1
Q9UKK9	ADP-sugar pyrophosphatase	NUDT5	0.00181229	3		1
Q66K79	Carboxypeptidase Z	CPZ	0.00180051	4		1
O43396	Thioredoxin-like protein 1	TXNL1	0.00179566	4		1
P01876	Immunoglobulin heavy constant alpha 1	IGHA1	0.00178961	4		1
Q53FA7	Quinone oxidoreductase PIG3	TP53I3	0.00177763	4		1
P28072	Proteasome subunit beta type-6	PSMB6	0.00174868	4		1
Q13885	Tubulin beta-2A chain	TUBB2A	0.00167972	5		1
E9PAV3	Nascent polypeptide-associated complex subunit alpha, muscle-specific form	NACA	0.00167236	3		1
Q16473	Putative tenascin-XA	TNXA	0.00167223	2		1
Q9NQC3	Reticulon-4	RTN4	0.00166885	3		1
Q9UJJ9	N-acetylglucosamine-1-phosphotransferase subunit gamma	GNPTG	0.00162868	3		1
P07910	Heterogeneous nuclear ribonucleoproteins C1/C2	HNRNPC	0.0015998	2		1
Q16543	Hsp90 co-chaperone Cdc37	CDC37	0.0015807	2		1
O75223	Gamma-glutamylcyclotransferase	GGCT	0.00156355	2		1
Q13214	Semaphorin-3B	SEMA3B	0.0015625	3		1
P30740	Leukocyte elastase inhibitor	SERPINB1	0.00155283	5		1
P50990	T-complex protein 1 subunit theta	CCT8	0.00153618	2		1
Q9BWD1	Acetyl-CoA acetyltransferase, cytosolic	ACAT2	0.0014782	3		1
Q9NUQ9	Protein FAM49B	FAM49B	0.00146783	3		1
Q8IUX7	Adipocyte enhancer-binding protein 1	AEBP1	0.00146217	4		1
P08195	4F2 cell-surface antigen heavy chain	SLC3A2	0.00144267	4	1	1
P09104	Gamma-enolase	ENO2	0.00143772	5		1
P46976	Glycogenin-1	GYG1	0.0014196	2		1
P30040	Endoplasmic reticulum resident protein 29	ERP29	0.00140886	6		1
Q5THJ4	Vacuolar protein sorting-associated protein 13D	VPS13D	0.0013908	2		1
P26885	Peptidyl-prolyl cis-trans isomerase FKBP2	FKBP2	0.00134987	3		1
Q14767	Latent-transforming growth factor beta-binding protein 2	LTBP2	0.00134828	2		1
Q96JI7	Spatacsin	SPG11	0.00133771	2		1
O43854	EGF-like repeat and discoidin I-like domain-containing protein 3	EDIL3	0.0012999	2		1
P26599	Polypyrimidine tract-binding protein 1	PTBP1	0.00129169	3		1
O95433	Activator of 90 kDa heat shock protein ATPase homolog 1	AHSA1	0.00128383	2		1
P61586	Transforming protein RhoA	RHOA	0.00127941	3	1	1
P29373	Cellular retinoic acid-binding protein 2	CRABP2	0.00127835	3		1
P49721	Proteasome subunit beta type-2	PSMB2	0.00126116	4		1
Q86VP6	Cullin-associated NEDD8-dissociated protein 1	CAND1	0.00123098	5		1
P54652	Heat shock-related 70 kDa protein 2	HSPA2	0.001226	3		1
Q9UHY7	Enolase-phosphatase E1	ENOPH1	0.001223	2		1
Q9NWV4	UPF0587 protein C1orf123	C1orf123	0.00120873	2		1
O00754	Lysosomal alpha-mannosidase	MAN2B1	0.00120144	2		1
Q9BRF8	Serine/threonine-protein phosphatase CPPED1	CPPED1	0.00118253	4		1
Q00610	Clathrin heavy chain 1	CLTC	0.00116992	4	1	1
Q8NCW5	NAD(P)H-hydrate epimerase	NAXE	0.00116938	2		1
Q14103	Heterogeneous nuclear ribonucleoprotein D0	HNRNPD	0.00116596	2		1
Q15746	Myosin light chain kinase, smooth muscle	MYLK	0.00113076	3		1
P61960	Ubiquitin-fold modifier 1	UFM1	0.00111586	2		1
O76003	Glutaredoxin-3	GLRX3	0.00110847	4		1
Q96CW1	AP-2 complex subunit mu	AP2M1	0.00110198	3		1
Q99538	Legumain	LGMN	0.00109989	2		1
Q7KZF4	Staphylococcal nuclease domain-containing protein 1	SND1	0.00109675	6		1
O15145	Actin-related protein 2/3 complex subunit 3	ARPC3	0.00105586	2		1
Q92484	Acid sphingomyelinase-like phosphodiesterase 3a	SMPDL3A	0.00105161	2		1
O14737	Programmed cell death protein 5	PDCD5	0.00100637	2		1
Q99536	Synaptic vesicle membrane protein VAT-1 homolog	VAT1	0.000984531	2		1
Q13332	Receptor-type tyrosine-protein phosphatase S	PTPRS	0.000944791	4		1
Q9NRV9	Heme-binding protein 1	HEBP1	0.000923142	2		1
P06756	Integrin alpha-V	ITGAV	0.000917622	4		1
Q16832	Discoidin domain-containing receptor 2	DDR2	0.000916933	2		1
O95967	EGF-containing fibulin-like extracellular matrix protein 2	EFEMP2	0.000901055	2		1
O15511	Actin-related protein 2/3 complex subunit 5	ARPC5	0.000860184	2		1
P22061	Protein-L-isoaspartate(D-aspartate) O-methyltransferase	PCMT1	0.000848301	3		1
P61086	Ubiquitin-conjugating enzyme E2 K	UBE2K	0.000847685	2		1
Q96CN7	Isochorismatase domain-containing protein 1	ISOC1	0.000845081	2		1
Q96QK1	Vacuolar protein sorting-associated protein 35	VPS35	0.000839635	3		1
P07437	Tubulin beta chain	TUBB	0.00082396	2		1
Q13126	S-methyl-5'-thioadenosine phosphorylase	MTAP	0.000815028	3		1
Q13228	Selenium-binding protein 1	SELENBP1	0.000795691	2		1
P23470	Receptor-type tyrosine-protein phosphatase gamma	PTPRG	0.000779868	2		1
Q6UX71	Plexin domain-containing protein 2	PLXDC2	0.000770048	2		1
O95861	3'(2'),5'-bisphosphate nucleotidase 1	BPNT1	0.000764383	4		1
K7ENT6	Tropomyosin alpha-4 chain (Fragment)	TPM4	0.000751396	2		1
P55268	Laminin subunit beta-2	LAMB2	0.000751158	2		1
P50502	Hsc70-interacting protein	ST13	0.000742539	2		1
P51888	Prolargin	PRELP	0.000734609	3		1
Q96DG6	Carboxymethylenebutenolidase homolog	CMBL	0.000722906	2		1
Q99574	Neuroserpin	SERPINI1	0.00071166	2		1
Q92598	Heat shock protein 105 kDa	HSPH1	0.000692708	3		1
Q7Z7M0	Multiple epidermal growth factor-like domains protein 8	MEGF8	0.000681615	5		1
P56537	Eukaryotic translation initiation factor 6	EIF6	0.000673908	3		1
P00568	Adenylate kinase isoenzyme 1	AK1	0.000658307	2		1
P50897	Palmitoyl-protein thioesterase 1	PPT1	0.000645611	2		1
P36871	Phosphoglucomutase-1	PGM1	0.000628867	2		1
Q15365	Poly(rC)-binding protein 1	PCBP1	0.000627168	2		1
P62140	Serine/threonine-protein phosphatase PP1-beta catalytic subunit	PPP1CB	0.000618422	3		1
Q96AM1	Mas-related G-protein coupled receptor member F	MRGPRF	0.00059025	2		1
Q8NCC3	Group XV phospholipase A2	PLA2G15	0.000581484	2		1
P38571	Lysosomal acid lipase/cholesteryl ester hydrolase	LIPA	0.000566046	2		1
P00390	Glutathione reductase, mitochondrial	GSR	0.000565178	2		1
P41250	Glycine--tRNA ligase	GARS	0.000557998	2		1
Q13011	Delta(3,5)-Delta(2,4)-dienoyl-CoA isomerase, mitochondrial	ECH1	0.00053187	2		1
Q15075	Early endosome antigen 1	EEA1	0.000515356	3		1
P27824	Calnexin	CANX	0.000507328	3		1
P18085	ADP-ribosylation factor 4	ARF4	0.000506581	2		1
Q96G03	Phosphoglucomutase-2	PGM2	0.000501168	2		1
P30711	Glutathione S-transferase theta-1	GSTT1	0.000501075	2		1
P61088	Ubiquitin-conjugating enzyme E2 N	UBE2N	0.000499556	2		1
P30084	Enoyl-CoA hydratase, mitochondrial	ECHS1	0.000497886	2		1
P55957	BH3-interacting domain death agonist	BID	0.000490823	2		1
P53621	Coatomer subunit alpha	COPA	0.000490509	3		1
P61224	Ras-related protein Rap-1b	RAP1B	0.000486429	2	1	1
P30520	Adenylosuccinate synthetase isozyme 2	ADSS	0.00047716	3		1
P68032	Actin, alpha cardiac muscle 1	ACTC1	0.000470868	3		1
P00750	Tissue-type plasminogen activator	PLAT	0.000469564	2		1
Q96PD5	N-acetylmuramoyl-L-alanine amidase	PGLYRP2	0.000456001	2		1
Q03405	Urokinase plasminogen activator surface receptor	PLAUR	0.000451052	2		1
P62873	Guanine nucleotide-binding protein G(I)/G(S)/G(T) subunit beta-1	GNB1	0.000447134	2	1	1
P16278	Beta-galactosidase	GLB1	0.000439267	2		1
P49006	MARCKS-related protein	MARCKSL1	0.000428343	2		1
Q9NTK5	Obg-like ATPase 1	OLA1	0.000424886	3		1
P53675	Clathrin heavy chain 2	CLTCL1	0.000411798	2		1
P02786	Transferrin receptor protein 1	TFRC	0.000392834	3	1	1
P26639	Threonine--tRNA ligase, cytoplasmic	TARS	0.000360347	2		1
P62879	Guanine nucleotide-binding protein G(I)/G(S)/G(T) subunit beta-2	GNB2	0.000339746	2	1	1
P35475	Alpha-L-iduronidase	IDUA	0.000335214	2		1
P30153	Serine/threonine-protein phosphatase 2A 65 kDa regulatory subunit A alpha isoform	PPP2R1A	0.000326093	2		1
P21399	Cytoplasmic aconitate hydratase	ACO1	0.000314574	4		1
O75144	ICOS ligand	ICOSLG	0.000312678	2		1
Q02790	Peptidyl-prolyl cis-trans isomerase FKBP4	FKBP4	0.000312064	2		1
Q92882	Osteoclast-stimulating factor 1	OSTF1	0.00030536	2		1
Q14517	Protocadherin Fat 1	FAT1	0.000296643	2		1
Q969P0	Immunoglobulin superfamily member 8	IGSF8	0.000288917	2		1
Q00169	Phosphatidylinositol transfer protein alpha isoform	PITPNA	0.000284861	2		1
P00491	Purine nucleoside phosphorylase	PNP	0.000282868	2		1
Q16706	Alpha-mannosidase 2	MAN2A1	0.000277017	3		1
O95833	Chloride intracellular channel protein 3	CLIC3	0.000276121	2		1
P13591	Neural cell adhesion molecule 1	NCAM1	0.000238251	2		1
Q9BT78	COP9 signalosome complex subunit 4	COPS4	0.000227026	2		1
Q96RW7	Hemicentin-1	HMCN1	0.000223631	2		1
P49327	Fatty acid synthase	FASN	0.000210997	3	1	1
P23526	Adenosylhomocysteinase	AHCY	0.000181612	2	1	1
P16930	Fumarylacetoacetase	FAH	0.000169662	2		1
Q15435	Protein phosphatase 1 regulatory subunit 7	PPP1R7	0.00016945	2		1
P49588	Alanine--tRNA ligase, cytoplasmic	AARS	0.000160571	2		1
P48643	T-complex protein 1 subunit epsilon	CCT5	0.000134518	2	1	1
P50991	T-complex protein 1 subunit delta	CCT4	8.00412e-05	2		1
P09486	SPARC	SPARC	3.34559	19
P02452	Collagen alpha-1(I) chain	COL1A1	2.59625	75
P02461	Collagen alpha-1(III) chain	COL3A1	1.86968	70
P08253	72 kDa type IV collagenase	MMP2	1.73428	43
Q01995	Transgelin	TAGLN	0.584152	18
P08254	Stromelysin-1	MMP3	0.547448	24
I3L3H7	Collagen alpha-1(I) chain (Fragment)	COL1A1	0.519588	3
P09493	Tropomyosin alpha-1 chain	TPM1	0.307732	21
P05997	Collagen alpha-2(V) chain	COL5A2	0.227956	44
P24593	Insulin-like growth factor-binding protein 5	IGFBP5	0.210502	12
Q9UBP4	Dickkopf-related protein 3	DKK3	0.208714	14
P48740	Mannan-binding lectin serine protease 1	MASP1	0.192277	16
P13611	Versican core protein	VCAN	0.186818	16
O43852	Calumenin	CALU	0.184345	23
P02545	Prelamin-A/C	LMNA	0.170925	29
P07951	Tropomyosin beta chain	TPM2	0.166326	15
P35442	Thrombospondin-2	THBS2	0.160203	32
P07585	Decorin	DCN	0.138713	9
P29279	Connective tissue growth factor	CTGF	0.130676	6
Q9NZJ4	Sacsin	SACS	0.125168	2
P24821	Tenascin	TNC	0.110461	48
Q6UXH9	Inactive serine protease PAMR1	PAMR1	0.101864	17
Q05682	Caldesmon	CALD1	0.0968218	14
P24347	Stromelysin-3	MMP11	0.0955989	8
Q15293	Reticulocalbin-1	RCN1	0.093667	11
P07093	Glia-derived nexin	SERPINE2	0.0919762	18
O76061	Stanniocalcin-2	STC2	0.0846698	9
P13797	Plastin-3	PLS3	0.07868	24
H7BYY1	Tropomyosin 1 (Alpha), isoform CRA	TPM1	0.0739085	3
P32455	Guanylate-binding protein 1	GBP1	0.0712705	20
Q5HYB6	Epididymis luminal protein 189	DKFZp686J1372	0.0705387	12
Q9H4D0	Calsyntenin-2	CLSTN2	0.0672435	15
Q9UHI8	A disintegrin and metalloproteinase with thrombospondin motifs 1	ADAMTS1	0.0671024	18
Q08629	Testican-1	SPOCK1	0.0578235	10
P02458	Collagen alpha-1(II) chain	COL2A1	0.0548211	6
Q8NBP7	Proprotein convertase subtilisin/kexin type 9	PCSK9	0.0495025	11
P13497	Bone morphogenetic protein 1	BMP1	0.0494949	16
Q6ZN40	Tropomyosin 1 (Alpha), isoform CRA	TPM1	0.049407	4
P41271	Neuroblastoma suppressor of tumorigenicity 1	NBL1	0.0461654	2
P01037	Cystatin-SN	CST1	0.0414153	8
P14314	Glucosidase 2 subunit beta	PRKCSH	0.0386907	11
Q9UBG0	C-type mannose receptor 2	MRC2	0.0369788	11
Q13308	Inactive tyrosine-protein kinase 7	PTK7	0.0355848	12
P13667	Protein disulfide-isomerase A4	PDIA4	0.0327858	19
Q5TCU3	Tropomyosin beta chain	TPM2	0.0309704	3
P00742	Coagulation factor X	F10	0.0296862	7
P0DMV9	Heat shock 70 kDa protein 1B	HSPA1B	0.029208	17
Q07954	Prolow-density lipoprotein receptor-related protein 1	LRP1	0.0271065	33
C9J813	Caldesmon (Fragment)	CALD1	0.026417	5
Q92859	Neogenin	NEO1	0.0238785	12
P03956	Interstitial collagenase	MMP1	0.0225357	11
P22692	Insulin-like growth factor-binding protein 4	IGFBP4	0.0223231	3
O00622	Protein CYR61	CYR61	0.0221649	5
Q6YHK3	CD109 antigen	CD109	0.0197965	21
P48681	Nestin	NES	0.0193254	19
Q96D15	Reticulocalbin-3	RCN3	0.018896	12
A0A0A6YYG9	Protein ARPC4-TTLL3	ARPC4-TTLL3	0.0188146	2
P02771	Alpha-fetoprotein	AFP	0.0187537	3
O75326	Semaphorin-7A	SEMA7A	0.0180604	9
Q14315	Filamin-C	FLNC	0.0176468	16
P31150	Rab GDP dissociation inhibitor alpha	GDI1	0.0149514	11
Q9NRN5	Olfactomedin-like protein 3	OLFML3	0.0139244	11
Q9ULV4	Coronin-1C	CORO1C	0.0130801	3
Q9UI42	Carboxypeptidase A4	CPA4	0.0128478	10
Q01105	Protein SET	SET	0.0125049	4
Q9H0R5	Guanylate-binding protein 3	GBP3	0.0119629	4
Q02952	A-kinase anchor protein 12	AKAP12	0.0119105	14
P06748	Nucleophosmin	NPM1	0.0119045	6
P09455	Retinol-binding protein 1	RBP1	0.0116123	7
P08476	Inhibin beta A chain	INHBA	0.0113004	14
P02042	Hemoglobin subunit delta	HBD	0.0111518	2
O00462	Beta-mannosidase	MANBA	0.0106699	9
P10646	Tissue factor pathway inhibitor	TFPI	0.0104686	3
A0A1B0GU03	Uncharacterized protein	N/A	0.0104422	2
O14786	Neuropilin-1	NRP1	0.0103669	13
Q15121	Astrocytic phosphoprotein PEA-15	PEA15	0.0102802	6
Q32P51	Heterogeneous nuclear ribonucleoprotein A1-like 2	HNRNPA1L2	0.0101023	4
Q15262	Receptor-type tyrosine-protein phosphatase kappa	PTPRK	0.00998262	5
Q15063	Periostin	POSTN	0.00956799	5
Q9NR12	PDZ and LIM domain protein 7	PDLIM7	0.0091312	4
Q9NVD7	Alpha-parvin	PARVA	0.00821404	5
Q86T90	Protein hinderin	KIAA1328	0.00812692	2
Q93070	Ecto-ADP-ribosyltransferase 4	ART4	0.007956	2
Q13219	Pappalysin-1	PAPPA	0.00790314	13
Q9BZM5	UL16-binding protein 2	ULBP2	0.00789315	2
P63010	AP-2 complex subunit beta	AP2B1	0.00768293	13
P27695	DNA-(apurinic or apyrimidinic site) lyase	APEX1	0.00745861	7
Q14240	Eukaryotic initiation factor 4A-II	EIF4A2	0.00740791	4
P24844	Myosin regulatory light polypeptide 9	MYL9	0.00731333	4
P20810	Calpastatin	CAST	0.00731306	6
O95302	Peptidyl-prolyl cis-trans isomerase FKBP9	FKBP9	0.00714211	5
P14324	Farnesyl pyrophosphate synthase	FDPS	0.00711453	3
P10124	Serglycin	SRGN	0.00696225	3
Q16394	Exostosin-1	EXT1	0.00680166	10
Q6IS14	Eukaryotic translation initiation factor 5A-1-like	EIF5AL1	0.00669551	2
Q14563	Semaphorin-3A	SEMA3A	0.00652608	4
P48163	NADP-dependent malic enzyme	ME1	0.00647509	6
Q03692	Collagen alpha-1(X) chain	COL10A1	0.00615471	2
Q58FG1	Putative heat shock protein HSP 90-alpha A4	HSP90AA4P	0.00596814	2
O95613	Pericentrin	PCNT	0.00593635	2
P26022	Pentraxin-related protein PTX3	PTX3	0.00593447	4
Q15643	Thyroid receptor-interacting protein 11	TRIP11	0.00585748	3
Q8NHW5	60S acidic ribosomal protein P0-like	RPLP0P6	0.00564466	4
Q15436	Protein transport protein Sec23A	SEC23A	0.00563477	8
E9PQ70	Inactive serine protease PAMR1 (Fragment)	PAMR1	0.00552887	2
P60983	Glia maturation factor beta	GMFB	0.00534827	2
P16234	Platelet-derived growth factor receptor alpha	PDGFRA	0.0052909	5
Q00839	Heterogeneous nuclear ribonucleoprotein U	HNRNPU	0.00527337	4
P99999	Cytochrome c	CYCS	0.00516925	3
Q12906	Interleukin enhancer-binding factor 3	ILF3	0.00510302	7
O00148	ATP-dependent RNA helicase DDX39A	DDX39A	0.00510269	3
Q96AY3	Peptidyl-prolyl cis-trans isomerase FKBP10	FKBP10	0.00507435	5
P12081	Histidine--tRNA ligase, cytoplasmic	HARS	0.00501206	9
P19367	Hexokinase-1	HK1	0.00500685	6
Q03252	Lamin-B2	LMNB2	0.00494282	3
P24534	Elongation factor 1-beta	EEF1B2	0.00490387	4
P34741	Syndecan-2	SDC2	0.00485215	2
P43235	Cathepsin K	CTSK	0.00481973	7
P51858	Hepatoma-derived growth factor	HDGF	0.00454014	7
P52823	Stanniocalcin-1	STC1	0.00439567	2
P09622	Dihydrolipoyl dehydrogenase, mitochondrial	DLD	0.00425393	7
Q00688	Peptidyl-prolyl cis-trans isomerase FKBP3	FKBP3	0.00412695	4
Q9P2E9	Ribosome-binding protein 1	RRBP1	0.00411937	8
Q15417	Calponin-3	CNN3	0.00407907	4
P42224	Signal transducer and activator of transcription 1-alpha/beta	STAT1	0.00405972	5
Q9HCL0	Protocadherin-18	PCDH18	0.00405564	4
O60462	Neuropilin-2	NRP2	0.003781	6
Q15631	Translin	TSN	0.00352015	2
Q9Y678	Coatomer subunit gamma-1	COPG1	0.00351838	4
P48444	Coatomer subunit delta	ARCN1	0.00350958	3
P48509	CD151 antigen	CD151	0.00348717	2
Q6NZI2	Caveolae-associated protein 1	CAVIN1	0.00348698	4
O95881	Thioredoxin domain-containing protein 12	TXNDC12	0.00342229	3
P13284	Gamma-interferon-inducible lysosomal thiol reductase	IFI30	0.00341821	8
Q9P0L0	Vesicle-associated membrane protein-associated protein A	VAPA	0.00341196	3
Q9ULZ3	Apoptosis-associated speck-like protein containing a CARD	PYCARD	0.00328421	5
Q9Y2B0	Protein canopy homolog 2	CNPY2	0.00316225	3
P05455	Lupus La protein	SSB	0.00311372	5
Q96HC4	PDZ and LIM domain protein 5	PDLIM5	0.00309889	3
P30049	ATP synthase subunit delta, mitochondrial	ATP5D	0.0030514	2
P10155	60 kDa SS-A/Ro ribonucleoprotein	TROVE2	0.00282581	4
P02462	Collagen alpha-1(IV) chain	COL4A1	0.00268393	2
Q6UWY5	Olfactomedin-like protein 1	OLFML1	0.00262077	4
P55145	Mesencephalic astrocyte-derived neurotrophic factor	MANF	0.00260383	2
P83916	Chromobox protein homolog 1	CBX1	0.00259181	4
O43399	Tumor protein D54	TPD52L2	0.00253178	3
Q5T4S7	E3 ubiquitin-protein ligase UBR4	UBR4	0.00251146	2
Q9H173	Nucleotide exchange factor SIL1	SIL1	0.00249405	4
Q9HBR0	Putative sodium-coupled neutral amino acid transporter 10	SLC38A10	0.00248007	3
Q9P2B2	Prostaglandin F2 receptor negative regulator	PTGFRN	0.00246136	7	1
Q9Y3B8	Oligoribonuclease, mitochondrial	REXO2	0.00243977	2
P32456	Guanylate-binding protein 2	GBP2	0.00241347	3
Q15691	Microtubule-associated protein RP/EB family member 1	MAPRE1	0.00230484	5
P09429	High mobility group protein B1	HMGB1	0.00230111	2
P54727	UV excision repair protein RAD23 homolog B	RAD23B	0.00226373	4
Q13185	Chromobox protein homolog 3	CBX3	0.00225419	2
Q53QV2	Protein LBH	LBH	0.00222415	3
P09238	Stromelysin-2	MMP10	0.00221559	6
Q16643	Drebrin	DBN1	0.00220057	6
Q9Y570	Protein phosphatase methylesterase 1	PPME1	0.00213773	4
Q9UKM7	Endoplasmic reticulum mannosyl-oligosaccharide 1,2-alpha-mannosidase	MAN1B1	0.0021069	2
B4E1Z4	cDNA FLJ55673, highly similar to Complement factor B (EC 3.4.21.47)	N/A	0.0020771	3
O95777	U6 snRNA-associated Sm-like protein LSm8	LSM8	0.00202181	3
B2RXH8	Heterogeneous nuclear ribonucleoprotein C-like 2	HNRNPCL2	0.0020044	2
P01130	Low-density lipoprotein receptor	LDLR	0.00198854	4
Q5TG12	Receptor-type tyrosine-protein phosphatase kappa	PTPRK	0.00192611	2
Q9P2D7	Dynein heavy chain 1, axonemal	DNAH1	0.00191182	2
Q9BYZ2	L-lactate dehydrogenase A-like 6B	LDHAL6B	0.00189955	2
O75954	Tetraspanin-9	TSPAN9	0.00189315	2
Q9Y4G6	Talin-2	TLN2	0.00187512	3
Q00887	Pregnancy-specific beta-1-glycoprotein 9	PSG9	0.00184966	3
Q9BQE3	Tubulin alpha-1C chain	TUBA1C	0.00183728	3	1
P00367	Glutamate dehydrogenase 1, mitochondrial	GLUD1	0.0018261	5
Q15238	Pregnancy-specific beta-1-glycoprotein 5	PSG5	0.00175158	3
O60245	Protocadherin-7	PCDH7	0.00170581	4
P48745	Protein NOV homolog	NOV	0.00167182	3
Q86UP2	Kinectin	KTN1	0.00165474	2
O60506	Heterogeneous nuclear ribonucleoprotein Q	SYNCRIP	0.00163211	4
P25774	Cathepsin S	CTSS	0.00162715	4
O95782	AP-2 complex subunit alpha-1	AP2A1	0.00158635	5
P05161	Ubiquitin-like protein ISG15	ISG15	0.00157104	3
Q14696	LRP chaperone MESD	MESD	0.00156447	2
D6R9P3	Heterogeneous nuclear ribonucleoprotein A/B	HNRNPAB	0.00153258	2
P84090	Enhancer of rudimentary homolog	ERH	0.00152246	2
Q96FJ2	Dynein light chain 2, cytoplasmic	DYNLL2	0.00152238	2
O00410	Importin-5	IPO5	0.00149772	7
P17813	Endoglin	ENG	0.00148242	2
O60664	Perilipin-3	PLIN3	0.00145243	5
Q99729	Heterogeneous nuclear ribonucleoprotein A/B	HNRNPAB	0.00137868	2
Q14257	Reticulocalbin-2	RCN2	0.00134758	5
Q9NPH2	Inositol-3-phosphate synthase 1	ISYNA1	0.0013059	2
Q9Y680	Peptidyl-prolyl cis-trans isomerase FKBP7	FKBP7	0.00127333	2
Q6P179	Endoplasmic reticulum aminopeptidase 2	ERAP2	0.00126217	5
Q8WWX9	Selenoprotein M	SELENOM	0.00124724	2
Q9NQP4	Prefoldin subunit 4	PFDN4	0.00124456	2
P25391	Laminin subunit alpha-1	LAMA1	0.00123461	4
P29692	Elongation factor 1-delta	EEF1D	0.00122794	2
Q16576	Histone-binding protein RBBP7	RBBP7	0.00119515	2
P49590	Probable histidine--tRNA ligase, mitochondrial	HARS2	0.00116986	2
Q07021	Complement component 1 Q subcomponent-binding protein, mitochondrial	C1QBP	0.0011435	2
O14579	Coatomer subunit epsilon	COPE	0.00112842	4
P20700	Lamin-B1	LMNB1	0.0011152	4
Q9UPN3	Microtubule-actin cross-linking factor 1, isoforms 1/2/3/5	MACF1	0.00111211	5
P63279	SUMO-conjugating enzyme UBC9	UBE2I	0.00109652	3
Q13046	Putative pregnancy-specific beta-1-glycoprotein 7	PSG7	0.00106009	2
P48147	Prolyl endopeptidase	PREP	0.00105855	3
P50281	Matrix metalloproteinase-14	MMP14	0.00104598	3
P25398	40S ribosomal protein S12	RPS12	0.00102595	2
P14735	Insulin-degrading enzyme	IDE	0.00102108	2
Q9BSJ8	Extended synaptotagmin-1	ESYT1	0.00101106	2
Q86SR1	Polypeptide N-acetylgalactosaminyltransferase 10	GALNT10	0.000984111	3
Q9Y240	C-type lectin domain family 11 member A	CLEC11A	0.000963783	2
Q5JRA6	Transport and Golgi organization protein 1 homolog	MIA3	0.000924405	2
Q9Y4F1	FERM, ARHGEF and pleckstrin domain-containing protein 1	FARP1	0.000916029	3
Q12852	Mitogen-activated protein kinase kinase kinase 12	MAP3K12	0.000899121	2
Q8N883	Zinc finger protein 614	ZNF614	0.000897475	2
P78330	Phosphoserine phosphatase	PSPH	0.000896865	2
Q15155	Nodal modulator 1	NOMO1	0.000862407	4
Q9UHX1	Poly(U)-binding-splicing factor PUF60	PUF60	0.0008541	2
Q9Y4K0	Lysyl oxidase homolog 2	LOXL2	0.000848525	4
Q12792	Twinfilin-1	TWF1	0.000829239	2
Q9Y5S9	RNA-binding protein 8A	RBM8A	0.00082623	2
O60391	Glutamate receptor ionotropic, NMDA 3B	GRIN3B	0.000777115	2
P55058	Phospholipid transfer protein	PLTP	0.000741169	3
Q10567	AP-1 complex subunit beta-1	AP1B1	0.000709673	2
P49746	Thrombospondin-3	THBS3	0.000705763	2
Q9Y266	Nuclear migration protein nudC	NUDC	0.000701917	2
P49589	Cysteine--tRNA ligase, cytoplasmic	CARS	0.000698992	2
Q10472	Polypeptide N-acetylgalactosaminyltransferase 1	GALNT1	0.000687888	2
P31937	3-hydroxyisobutyrate dehydrogenase, mitochondrial	HIBADH	0.000676898	2
Q96CG8	Collagen triple helix repeat-containing protein 1	CTHRC1	0.000660179	2
P48506	Glutamate--cysteine ligase catalytic subunit	GCLC	0.00065462	3
Q6UWH4	Protein FAM198B	FAM198B	0.000652171	2
O14933	Ubiquitin/ISG15-conjugating enzyme E2 L6	UBE2L6	0.000646907	2
P21246	Pleiotrophin	PTN	0.000640714	2
Q6P587	Acylpyruvase FAHD1, mitochondrial	FAHD1	0.000632561	2
P61326	Protein mago nashi homolog	MAGOH	0.000586178	2
O75396	Vesicle-trafficking protein SEC22b	SEC22B	0.000570093	2
Q14203	Dynactin subunit 1	DCTN1	0.000567413	3
O43390	Heterogeneous nuclear ribonucleoprotein R	HNRNPR	0.000556754	3
O14980	Exportin-1	XPO1	0.000551207	3
Q8IWU6	Extracellular sulfatase Sulf-1	SULF1	0.000525062	2
Q13642	Four and a half LIM domains protein 1	FHL1	0.000508551	2
P62495	Eukaryotic peptide chain release factor subunit 1	ETF1	0.000492088	2
Q96AC1	Fermitin family homolog 2	FERMT2	0.0004836	2
Q9NX46	Poly(ADP-ribose) glycohydrolase ARH3	ADPRHL2	0.000481988	2
Q04637	Eukaryotic translation initiation factor 4 gamma 1	EIF4G1	0.000479083	2
Q99798	Aconitate hydratase, mitochondrial	ACO2	0.000466824	3
Q8IWE2	Protein NOXP20	FAM114A1	0.000457211	2
O14561	Acyl carrier protein, mitochondrial	NDUFAB1	0.000456412	2
Q9Y275	Tumor necrosis factor ligand superfamily member 13B	TNFSF13B	0.000448032	2
P29317	Ephrin type-A receptor 2	EPHA2	0.000437648	2
P31943	Heterogeneous nuclear ribonucleoprotein H	HNRNPH1	0.000412721	2
Q76M96	Coiled-coil domain-containing protein 80	CCDC80	0.000401629	2
Q9NPH3	Interleukin-1 receptor accessory protein	IL1RAP	0.000389508	2
P22304	Iduronate 2-sulfatase	IDS	0.000378519	2
Q96DB5	Regulator of microtubule dynamics protein 1	RMDN1	0.000349676	2
P06132	Uroporphyrinogen decarboxylase	UROD	0.000345852	2
P13010	X-ray repair cross-complementing protein 5	XRCC5	0.000343567	2
Q7Z7M9	Polypeptide N-acetylgalactosaminyltransferase 5	GALNT5	0.000330234	2
P12956	X-ray repair cross-complementing protein 6	XRCC6	0.000328463	2
O00339	Matrilin-2	MATN2	0.000308426	2
P54687	Branched-chain-amino-acid aminotransferase, cytosolic	BCAT1	0.000291708	2
P23229	Integrin alpha-6	ITGA6	0.000283645	2	1
P14902	Indoleamine 2,3-dioxygenase 1	IDO1	0.000280777	2
P54756	Ephrin type-A receptor 5	EPHA5	0.000275234	2
Q99645	Epiphycan	EPYC	0.000258019	2
P31942	Heterogeneous nuclear ribonucleoprotein H3	HNRNPH3	0.000240025	2
P49903	Selenide, water dikinase 1	SEPHS1	0.000234043	2
Q6P4A8	Phospholipase B-like 1	PLBD1	0.000207885	2
Q7Z7G0	Target of Nesh-SH3	ABI3BP	0.000205181	2
Q16401	26S proteasome non-ATPase regulatory subunit 5	PSMD5	0.000200321	2
Q9Y5B9	FACT complex subunit SPT16	SUPT16H	0.00019986	2
P52888	Thimet oligopeptidase	THOP1	0.000145786	2
Q8NI22	Multiple coagulation factor deficiency protein 2	MCFD2	0.000136111	2
Q9H993	Protein-glutamate O-methyltransferase	ARMT1	0.000133325	2
P45974	Ubiquitin carboxyl-terminal hydrolase 5	USP5	0.000106332	2
Q8WZA0	Protein LZIC	LZIC	7.57898e-05	2
