# Supplementary material for: Unraveling the Molecular Signature of Extracellular Vesicles From Endometrial-Derived Mesenchymal Stem Cells: Potential Modulatory Effects and Therapeutic Applications
Source: Front Bioeng Biotechnol. 2019 Dec 20;7:431. doi: 10.3389/fbioe.2019.00431 (PMC6932983; doi:10.3389/fbioe.2019.00431)
Supplement: Supplementary file 2 [file Table_2.XLSX]

## Sheet: Supp-Table_2
Supplementary Table 2. Enrichment analysis of EV-endMSCs identified proteins (n=895) using DAVID software. Different annotation databases as Gene Ontology (GO), KEEG, REACTOME or BIOCARTA were used. “Count” means the number of proteins within the corresponding category annotation. The percentage represents the proportion of gene-coded proteins annotated within the category. The magnitude of the c…
Original database	Category	Count	%	p value	Proteins	Fold Enrichment	FDR Benjamini
GOTERM_CC_DIRECT	GO:0070062~extracellular exosome	598	69.1329	2.62431e-297	P46940, P17655, P07437, P16278, Q7Z3B1, P08603, P27816, P0DP23, P07737, P53621, P30711, P28062, P13645, P13647, P50502, P13646, P35475, P59998, P17661, P28065, P14649, P28066, P06681, Q8NBS9, Q9BQ51, O75368, Q92520, O75369, Q562R1, P28072, O15230, P28070, Q07812, P61586, P07237, Q16832, P13798, A0A0A0MTI5, P13796, P53634, Q10471, Q16851, Q99439, Q99536, G5EA09, P52565, Q99538, P46926, P11766, P16…	4.49756	1.61658e-294
GOTERM_MF_DIRECT	GO:0005515~protein binding	564	65.2023	3.02887e-19	P46940, P17655, P16278, P07437, P01130, Q7Z3B1, P08603, P27816, P0DP23, P07737, O95777, P28062, P13647, P50502, P59998, P17661, P28065, Q00839, P34741, P14649, P28066, Q01105, Q8NBS9, Q04637, Q92520, O75369, Q562R1, P28070, Q07812, O95881, P61586, Q16832, P07237, O95782, P13798, P53634, Q10471, Q16851, G5EA09, P52565, Q13642, P46926, Q99436, P13667, A0A024RA52, P27348, P14625, P06756, Q9P2B2, P63…	1.28256	9.95488e-17
GOTERM_CC_DIRECT	GO:0005737~cytoplasm	349	40.3468	2.29528e-14	P46940, P16278, P07437, P17655, P00367, Q13867, P78417, P29692, P13591, P27816, Q99988, P23528, P23526, P14324, P0DP23, P53621, P61769, P07737, Q9BRF8, P28062, P13645, Q9Y696, Q9P2D7, P13647, P50502, P62857, P00568, Q9BQE3, Q15075, P28065, P28066, P68104, Q01105, P49589, P00352, P49588, Q5T4S7, Q04637, P41250, O75368, O75369, Q562R1, Q00169, P28072, P49590, Q8IUX7, P28070, P36871, Q07812, Q15063,…	1.41294	7.07878e-13
GOTERM_CC_DIRECT	GO:0005829~cytosol	330	38.1503	5.34401e-46	P46940, P17655, H0YDD8, Q13867, P78417, P29692, P43034, P04216, O14786, P23526, P14324, P0DP23, P53621, P07737, P11142, P28062, P30711, Q9Y696, P13647, P50502, P62857, P00568, Q15075, P59998, Q9UHL4, P17661, P28065, P14649, P28066, P68104, P14902, Q01105, P49589, P00352, P49588, Q04637, P41250, O75369, P09493, P28072, P28070, P36871, P62258, Q07812, P00558, P61586, O95782, P13798, P55957, P13796,…	2.10459	6.58382e-44
GOTERM_CC_DIRECT	GO:0005615~extracellular space	248	28.6705	1.95515e-84	P16278, P08603, O76061, Q99988, P23528, O14786, Q9GZX9, P61769, P53621, P11142, P13645, P98160, P06681, P68104, P20933, Q9UKU9, O75368, Q562R1, Q8IUX7, O15230, P10124, Q15063, P53634, P13796, Q02818, P10646, P13473, G5EA09, P52565, P41222, Q16706, Q969H8, P01008, P09486, P07942, P09382, O75882, Q13214, Q13219, P07225, P63104, Q7Z7G0, P22692, Q9UBX5, Q96CG8, Q15582, P62987, P06396, P68133, I3L3H7,…	3.89243	6.02187e-82
GOTERM_CC_DIRECT	GO:0016020~membrane	214	24.7399	3.17332e-26	P01130, H0YDD8, P13591, P23528, O14786, P61769, P07737, P53621, P11142, Q9BSJ8, P13645, P13647, Q15075, Q00839, O60506, P68104, P10619, P49588, Q5T4S7, Q04637, Q9UBG0, Q9P2E9, Q07812, P62258, P00558, O95782, P55957, P53634, Q10472, O00410, Q10471, Q99439, Q02818, P13473, G5EA09, Q86UP2, P27348, P14625, P06756, Q16706, P11021, P27824, P00338, P20810, P06576, P23284, Q96PD5, Q13228, P21926, Q07021,…	2.05649	2.17196e-24
GOTERM_CC_DIRECT	GO:0005576~extracellular region	187	21.6185	4.25586e-32	P07437, P08603, Q99988, O76061, P0DP23, P61769, P98160, P06681, Q6UWY5, Q92520, Q6UVK1, P24043, O15230, P10124, P07237, Q10472, P10646, P05997, P18206, P41222, P09871, P35609, P00491, P14625, P01008, P09486, P07942, P07225, Q13219, P22692, Q9UBX5, Q15582, O95967, P06396, Q9NRV9, P21810, I3L3H7, P13284, P07602, P0C0L5, P55083, P49746, P01033, P36955, P16035, P01857, P01859, P05121, Q05707, P01024,…	2.45557	3.27701e-30
GOTERM_MF_DIRECT	GO:0044822~poly(A) RNA binding	125	14.4509	1.83512e-17	Q12906, Q9UPN3, Q01082, P27816, H0Y3Z3, P14324, P07737, O95777, P11142, P05455, P62857, O00148, O43390, O43707, Q00839, P61978, O60506, P68104, P04080, P68036, P22626, Q04637, O75369, Q99729, P60842, Q15149, P49590, Q9P2E9, P08238, P62258, P10599, P07237, P13798, P63241, O00410, P38159, Q14974, P12956, P04075, Q86UP2, Q00688, P30050, P13667, Q7KZF4, P51858, P09382, Q00610, P50991, P63279, P55072,…	2.21186	3.61885e-15
GOTERM_CC_DIRECT	GO:0005925~focal adhesion	117	13.526	4.95068e-61	P46940, P17655, H0YDD8, P19022, Q9ULV4, H0Y3Z3, P04216, P23528, O14786, P61769, P07737, P11142, P15151, P08758, O43707, P50281, P61978, P98160, P04083, Q9Y490, P05556, P05362, O75954, O15511, Q9UBG0, O00560, Q6UVK1, O75369, Q15149, P55290, H0YDL9, P62258, P61586, Q16832, P07237, P67936, Q9NR12, P13796, Q99439, P18206, Q92692, G5EA09, Q13642, Q15404, Q9Y4G6, Q12792, P35609, P30050, P12814, P27348,…	6.32624	7.62404e-59
GOTERM_CC_DIRECT	GO:0031012~extracellular matrix	113	13.0636	8.84374e-72	Q16270, P07437, P04406, Q99715, H0Y3Z3, P02461, P23528, P02462, P11142, P02458, P05452, P50281, Q00839, P61978, P98160, P12111, P08572, Q15113, O75369, P24043, P60842, P02545, Q15149, P02649, Q8IUX7, O15230, P07237, Q15063, P05997, Q96RW7, O00468, P30050, P48681, P22105, P14625, P09382, P07942, Q00610, P11021, P27824, Q7Z7G0, Q9UBX5, P02452, P55268, Q15582, P07585, P06576, P08253, P21810, P14618,…	8.07092	1.81591e-69
KEGG_PATHWAY	hsa01100:Metabolic pathways	112	12.948	0.00402576	P16278, P00367, P04406, P43034, P23526, P14324, Q6P587, P54819, P35475, P00568, P53396, P14902, P00352, P18669, P49903, P48163, P36871, Q9UKM7, P00558, K7EM49, P15259, P78330, Q10472, Q10471, Q16851, Q7Z7M9, P15586, Q16394, P04075, P41222, Q09328, P46926, P11766, P09622, P16152, P30041, P00491, O95336, Q16706, P30049, Q15904, P09104, P22304, Q9BYZ2, Q15274, P07205, P37837, P60174, Q9Y617, P00338,…	1.2666	0.037525
GOTERM_MF_DIRECT	GO:0005509~calcium ion binding	101	11.6763	2.61356e-21	P46940, P17655, Q9UPN3, P01130, P19022, P19021, P0DP23, P05452, P08758, O43707, P50281, P98160, P14649, P04083, P06703, Q8WVQ1, Q15293, P80303, P48163, P55287, P14314, Q9UKM7, P55290, P67936, P13797, P13796, P78330, Q02818, Q96RW7, O00468, A6NMY6, P09871, Q7Z7M0, Q9NZN4, P35609, Q9Y680, P12814, P19105, Q14651, P14625, P09486, P11021, Q14257, P07225, P27824, Q96D15, Q9UBX5, Q12841, P07384, O95967,…	2.81413	1.28849e-18
GOTERM_CC_DIRECT	GO:0005739~mitochondrion	100	11.5607	3.79744e-06	Q12906, Q96QK1, P00367, P14324, P17900, Q6P587, Q9Y696, P13647, Q99497, Q96FJ2, P49588, Q13011, P48163, O00299, P49590, P08238, Q07812, P09211, P62258, P10599, P55957, Q9NQP4, P11766, P09622, O94760, P27348, Q7KZF4, P30044, P30049, P09486, Q00610, P11021, Q15907, Q9BYZ2, P63104, P27695, O43396, Q96DB5, P49327, P07384, P07195, P19367, P99999, P06576, P31937, O75874, P08253, Q04917, P07954, P14618,…	1.58839	5.99785e-05
GOTERM_CC_DIRECT	GO:0005913~cell-cell adherens junction	85	9.82659	2.7295e-39	P07355, P46940, Q9UPN3, Q01082, P42224, P19022, P06733, P29692, P37802, P31946, P07737, P11142, P15311, P15151, P31949, P61978, Q9Y266, Q06830, Q6EMK4, Q99497, P04083, Q9Y490, P05556, Q04637, P21333, O00560, Q07960, Q16643, O75369, P35579, Q13813, P28072, Q15149, Q15417, O00299, Q05682, P08238, P47756, P62258, Q96HC4, Q14847, Q15365, Q99439, Q96TA1, P29317, P18206, Q92692, Q9HC38, G5EA09, P04075,…	5.56356	2.80228e-37
GOTERM_CC_DIRECT	GO:0005783~endoplasmic reticulum	84	9.71098	5.98047e-11	P17655, P30504, O76061, P29692, Q92626, Q9ULZ3, H0Y3Z3, P04216, Q8NBP7, Q8IWU6, O43390, P30455, P16188, Q99497, O60506, P10619, Q01105, P20933, Q8NBS9, Q15293, Q9NZ08, P80303, Q6P179, P55145, P16190, P02649, P21980, P14314, Q9P2E9, Q9UKM7, Q07812, P10909, P07237, Q9Y646, P24534, A0A0A0MTI5, P01034, P33908, Q9H173, P10646, Q9Y2B0, Q16394, O95302, Q14696, P27797, P61916, Q86UP2, O60568, P30479, P14…	2.14479	1.47359e-09
GOTERM_MF_DIRECT	GO:0098641~cadherin binding involved in cell-cell adhesion	80	9.24855	6.93781e-37	P07355, P46940, Q9UPN3, Q01082, P42224, P06733, P29692, P37802, P31946, P07737, P11142, P15311, P31949, P61978, Q9Y266, Q06830, Q6EMK4, Q99497, P04083, Q9Y490, P05556, Q04637, P21333, O00560, Q07960, Q16643, O75369, P35579, Q13813, P28072, Q15149, Q15417, O00299, Q05682, P08238, P47756, P62258, Q96HC4, Q14847, Q15365, Q99439, Q96TA1, P29317, P18206, Q9HC38, G5EA09, P04075, C9J813, Q12792, Q86UP2,…	5.51104	6.84068e-34
GOTERM_CC_DIRECT	GO:0009986~cell surface	77	8.90173	7.58912e-18	P07355, Q12907, P01130, P30504, P17813, Q07021, P19021, P13591, O15031, O14786, Q8NBP7, P16035, Q9Y696, P15151, Q8IWU6, Q9BZM5, P30455, P08174, P08962, Q00839, P16188, P34741, Q6EMK4, P02787, P02788, P04083, P30530, P05556, Q9Y490, P02786, P05362, P11717, Q6UVK1, P14735, Q9NRA1, O94985, Q9BRK3, P16190, P08238, P10809, P10909, Q9BS26, P10646, Q15262, P29317, Q92692, P21589, P27797, P00505, Q6YHK3,…	3.0035	3.1166e-16
GOTERM_CC_DIRECT	GO:0005794~Golgi apparatus	74	8.55491	9.38867e-07	P16278, P17655, Q9UPN3, P61204, Q12907, P01130, P15291, P30504, O76061, Q8NBP7, P61769, P18085, O00391, Q8IWU6, P30455, Q9UHL4, P16188, P80303, Q92520, Q9BRK5, P28072, P16190, P02649, P13497, Q9UKM7, P10809, P10124, P10909, P24592, Q9Y646, P31150, A0A0A0MTI5, Q10472, O00410, Q10471, P33908, Q02818, Q16394, P16870, P27797, P29279, P41222, Q86VP6, Q8WVN6, P50897, P30479, Q9Y678, Q9P2B2, Q9Y287, Q9U…	1.81283	1.65239e-05
GOTERM_MF_DIRECT	GO:0042802~identical protein binding	73	8.43931	6.85801e-08	P04406, P00367, P42224, P01130, Q13867, P17174, Q13185, P60709, Q9ULZ3, P54687, P23526, P61769, P02458, P50502, A0A1C7CYX9, O00148, P17661, P23470, Q99497, Q06830, P08476, Q15631, P02786, P49903, P11717, O00560, O75369, P08123, Q9BRK5, P02649, P26447, O14818, Q07812, P04179, P13798, P53634, P04792, P13796, P19338, P01034, P38159, Q16851, P02751, Q92692, P00441, G5EA09, P04075, Q9Y6C2, P09871, P00…	1.94707	3.38099e-06
GOTERM_CC_DIRECT	GO:0048471~perinuclear region of cytoplasm	73	8.43931	1.46899e-12	P07355, P16278, Q9Y275, P61204, P49746, P04406, P42224, O76061, P19021, P43034, Q14240, P31946, Q8NBP7, P08133, P36955, P15311, Q9Y696, O43707, Q99497, P54756, P08476, P02787, Q01105, P05556, P02786, P06703, P26038, P11717, P21333, P11279, Q07960, P55145, P02545, O00299, P26447, P55290, P10909, P15121, Q10472, P01034, Q10471, Q02790, P27797, P29279, P41222, P58546, Q9NZN4, Q12792, P07900, P30044,…	2.48524	3.9342e-11
GOTERM_MF_DIRECT	GO:0042803~protein homodimerization activity	72	8.3237	5.32035e-08	P42224, P15291, P17813, P16234, O76061, P43034, Q9ULZ3, P07686, P29401, P08133, P48740, P15151, P31949, Q15075, O43707, Q99497, P04083, P49589, P02786, P06703, Q8WUM4, P49903, Q8WVQ1, P21333, O00560, P35579, P06748, P14735, Q9NRA1, Q53FA7, P49590, P02649, P55290, Q07812, Q9Y646, P78330, Q92692, Q16394, P00441, Q8NCW5, G5EA09, P62942, Q12852, P00505, P11766, P35609, O75223, P12814, P07900, P83916,…	1.97039	2.91436e-06
GOTERM_BP_DIRECT	GO:0098609~cell-cell adhesion	70	8.09249	2.55854e-30	P46940, P07355, Q9UPN3, Q01082, P42224, P06733, P29692, P37802, P31946, P07737, P11142, P31949, P61978, Q9Y266, Q06830, Q6EMK4, Q99497, Q04637, O00560, Q07960, Q16643, O75369, Q13813, P28072, Q15417, Q15149, Q05682, P08238, P47756, P62258, Q96HC4, Q14847, Q15365, Q99439, Q96TA1, P29317, Q9HC38, G5EA09, P04075, C9J813, Q12792, Q86UP2, P30041, P52907, Q7KZF4, P08195, Q9UHX1, Q09666, P50990, O95433,…	5.15745	8.54551e-27
GOTERM_BP_DIRECT	GO:0006508~proteolysis	66	7.63006	1.28717e-12	P17655, Q13867, P43235, Q9NZP8, Q66K79, Q92820, P48740, Q9H4A4, P01857, P01859, P55786, Q9UHL4, P01024, P50281, Q99497, P25774, P00736, P06681, P10619, P02788, P20933, Q15113, Q9UHI8, Q6P179, P42785, P14735, P0DOY2, P24347, P13497, P04632, Q9Y646, P13798, P53634, P00746, P12955, P09871, P07711, P09622, Q99538, P01834, P00751, P00750, Q9UBR2, P48147, P09960, Q92743, H0Y983, Q13219, P30101, P01861,…	2.63561	3.58269e-10
GOTERM_BP_DIRECT	GO:0007155~cell adhesion	65	7.51445	7.65034e-14	Q16270, P49746, P15291, P20908, P21926, P19022, P17813, P13591, Q99715, P04216, P12111, P05362, O00622, P55287, P24043, O94985, P35580, P24821, Q13308, P55290, Q9HCL0, Q16832, Q15063, O14498, P13611, Q15262, P35442, P02751, P18206, Q92692, P29279, Q9Y6C2, Q9Y4G6, P35609, P48509, P22105, P06756, Q9NVD7, P07942, P11047, P07996, Q9BUD6, Q9Y4K0, P12110, Q14112, K7EKE8, A0A087WXW9, Q13332, P02452, Q5T…	2.82753	3.19365e-11
GOTERM_BP_DIRECT	GO:0030198~extracellular matrix organization	53	6.12717	5.2208e-24	P15291, P20908, Q92626, P02461, P02462, P02458, P05121, Q03692, Q05707, P98160, P05556, P14543, P12111, P08572, P05362, O00622, P08123, P24043, Q76M96, P24821, O15230, Q16832, Q15063, P13611, P02751, P05997, O00468, Q9Y6C2, P06756, P09486, P07942, P11047, P07996, Q14118, Q7Z7G0, P12110, Q14112, A0A087WXW9, P02452, Q9UBX5, P23142, P05067, P25391, Q16363, P55268, P35555, Q15582, P07585, P51884, P12…	5.39916	8.71874e-21
REACTOME_PATHWAY	R-HSA-114608:R-HSA-114608	52	6.01156	5.74911e-27	P01033, Q14624, P21926, P37802, P23528, P0DP23, P07737, O00391, Q9BWS9, P05452, P05121, Q9BYX7, P08758, O43707, P08962, P01023, Q9NUQ9, P02787, Q9Y490, P21333, O60245, Q92520, H0Y789, P55145, P10124, P10909, Q99969, O14498, P00746, P02751, P18206, P13473, P00441, P04075, Q6YHK3, P35609, P12814, Q16610, P09486, P11021, P07996, P07225, Q01518, P02768, P02765, P05067, Q9NTK5, P62937, Q06481, P05155,…	5.95082	4.13361e-24
KEGG_PATHWAY	hsa04510:Focal adhesion	52	6.01156	1.42855e-15	P17655, P49746, P20908, Q9GZP0, P16234, P60709, P02461, P02462, P02458, O43707, P62140, P05556, Q9Y490, P12111, P08572, P21333, O75369, P08123, Q9NRA1, P24043, P24821, O15230, P61586, P35442, P02751, P05997, P18206, Q9Y4G6, P35609, P12814, P22105, P19105, P06756, P09619, Q9NVD7, P07942, P11047, P07996, P46108, P61224, P12110, Q08043, A0A087WXW9, P02452, P25391, Q16363, P55268, Q14315, Q15746, P12…	3.47985	1.84741e-13
GOTERM_CC_DIRECT	GO:0005788~endoplasmic reticulum lumen	50	5.78035	6.27012e-23	P20908, Q9GZP0, H0Y3Z3, Q99715, P02461, P02462, P61769, P02458, Q03692, Q05707, P12111, P08572, Q8NBS9, Q9NZ08, Q15293, Q6P179, Q03405, P08123, Q9NRA1, P00742, P14314, O95881, P07237, P53634, Q9BS26, Q9H173, P05997, P27797, Q9Y680, P13667, P14625, Q9UBR2, Q969H8, P11021, P07996, Q14257, P30101, P27824, P12110, Q96D15, A0A087WXW9, P02452, P15289, P50454, P30040, Q15084, P12109, P23284, Q9UNW1, O00…	5.50561	2.97107e-21
GOTERM_CC_DIRECT	GO:0005578~proteinaceous extracellular matrix	49	5.66474	1.0673e-15	P01033, P20908, Q92626, P35052, Q66K79, P16035, Q03692, Q9HCU0, Q05707, Q99645, P12111, O00622, P48745, Q9UHI8, P08123, P24347, H0Y789, P13497, Q15063, P13611, P02751, P05997, P29279, Q9Y6C2, P27797, Q16610, P22105, P09486, P09382, Q9BUD6, P12110, A0A087WXW9, Q9UBX5, Q96CG8, P23142, P35555, P25391, Q15582, P09238, O00339, P51888, P51884, Q16473, P36222, A0A0A0MT20, P08254, P08253, Q08629, P21810,…	3.86543	3.79696e-14
KEGG_PATHWAY	hsa01130:Biosynthesis of antibiotics	49	5.66474	3.8881e-13	P04406, P17174, P06733, P54687, P29401, P14324, P54819, P00568, P53396, P40925, P40926, Q9NPH2, P18669, P06744, P09972, P36871, P00558, Q96G03, P52209, K7EM49, P14550, P15259, P78330, Q16851, Q8N0Y7, P04075, P00505, P11766, P09622, O95336, P13929, Q9BWD1, P09104, Q9BYZ2, P07205, P37837, P60174, Q9Y617, P00338, P07195, P19367, P15531, O95861, O75874, Q96DG6, P30084, P07954, P14618, Q99798, P21399	3.18629	1.99065e-11
GOTERM_CC_DIRECT	GO:0005764~lysosome	47	5.43353	2.09122e-17	P17655, Q8NCC3, P13473, P01130, P15586, P43235, Q6P4A8, P00441, P17174, P07711, Q99538, P61916, Q92820, Q8NBP7, P30041, P50897, Q01459, P10253, Q9UBR2, Q9BWS9, P45974, Q9UHL4, P08962, P25774, A0A0A0MRU5, P10619, O14773, P20933, P07858, P11279, P07384, P15289, P13686, P42785, Q13510, P17050, O00115, P54802, O00584, P38571, P07339, Q9Y646, P53634, P51688, P13284, P07602, P01034	4.39669	8.0512e-16
GOTERM_CC_DIRECT	GO:0043202~lysosomal lumen	47	5.43353	1.36646e-38	P16278, P13473, P15586, P02774, O00468, P07711, P35052, Q99538, P07686, O00462, Q8NHP8, P17900, P07900, P11142, P50897, O00754, P10253, P09619, P34059, P35475, P22304, P98160, P25774, P34741, P20062, P10619, P06865, O14773, Q9Y2E5, Q8NBS9, P15289, P04066, Q6UVK1, P46976, P51888, P07585, Q13510, P51884, P54802, O00584, P07339, P31431, P21810, P51688, P13284, P13611, P07602	11.69	1.20248e-36
KEGG_PATHWAY	hsa04151:PI3K-Akt signaling pathway	47	5.43353	3.1182e-05	P49746, P20908, Q9GZP0, P16234, P30153, P31946, P02461, P02462, P02458, Q16543, P12111, P05556, P08572, P08123, P24043, Q9NRA1, P24821, P08238, O15230, P62258, P35442, P02751, P29317, P05997, P61981, P22105, P27348, P07900, P62873, P06756, P14625, P09619, P62879, P07942, P11047, P07996, P63104, P12110, A0A087WXW9, P02452, P55268, Q16363, P25391, P09603, P12109, Q04917, P04004, P23229, I3L3H7	1.87803	0.00053204
GOTERM_CC_DIRECT	GO:0072562~blood microparticle	46	5.31792	4.70205e-24	P02751, Q14624, P01876, P02774, G5EA09, P08603, P60709, P09871, P19823, P01834, P07737, P11142, P00751, P01857, P01859, P01008, P68032, P04264, P01024, P01023, P17066, P07225, P63104, P00736, P01861, P02787, P69905, P02786, P02768, P02765, P26038, P54652, O00560, P0DOY2, P0DMV9, P20742, O00299, P02649, P05155, P06396, P10909, P68133, P04004, P02042, P02790, Q08380, P0C0L5	6.3981	2.41372e-22
GOTERM_CC_DIRECT	GO:0000139~Golgi membrane	45	5.20231	0.00201192	P61204, Q12907, P15291, Q9GZP0, P30504, Q86SR1, P13591, P61769, P53621, P30455, P08174, P16188, O94985, Q9NRA1, P16190, P10124, Q10567, Q8NI22, P53634, Q10472, Q10471, P33908, Q7Z7M9, Q16394, Q09328, P30479, Q9Y678, Q16706, Q9UBR2, Q9H0R5, Q9Y287, Q9UJJ9, Q5JRA6, P07225, O14579, P30475, Q9P0L0, O14672, P18462, O43505, Q93063, Q15436, O75396, Q6UWH4, Q9H4D0, P32456, P32455, P48444, Q15643	1.60976	0.0186213
GOTERM_BP_DIRECT	GO:0055114~oxidation-reduction process	45	5.20231	0.00556777	Q99536, P00367, P00441, P78417, Q92626, P19021, P16152, O60568, P30041, P30044, O00391, P32119, Q9BYZ2, Q06830, Q9Y4K0, Q02809, Q9H299, P27695, P14902, O43396, P30101, P08294, Q9BRA2, P00352, P00390, P00338, P49327, P07195, P48163, P99999, P50395, P35754, Q53FA7, P31937, O95881, P10599, P04179, P52209, Q16881, K7EM49, P15121, P14550, O76003, P31150, Q14914, P13284	1.51774	0.124712
GOTERM_CC_DIRECT	GO:0043209~myelin sheath	44	5.08671	3.52356e-22	Q8N0Y7, P09936, P00441, P60709, P00505, P09622, P04216, P61981, P29401, Q16555, P07900, P11142, P15311, P62873, P62879, A0A1C7CYX9, P48643, Q00610, P11021, P09104, P55072, Q06830, P30101, P40925, P27824, P40926, P18669, P02768, P26038, Q8WUM4, P54652, P68363, P06744, P07195, P06576, Q00169, P50395, P35241, Q7Z406, Q16658, P10809, P04179, P14618, Q99798, P31150	6.11992	1.55037e-20
KEGG_PATHWAY	hsa04142:Lysosome	44	5.08671	8.70118e-20	P16278, Q8NCC3, P13473, P15586, P43235, P07711, P61916, Q99538, P07686, O00462, P17900, P50897, O00754, P10253, Q9UBR2, P34059, P35475, Q15904, Q00610, Q9UJJ9, P22304, P08962, P25774, A0A0A0MRU5, P10619, P06865, O14773, P20933, P07858, P11717, P15289, P11279, P13686, Q13510, P17050, O00115, P54802, P38571, P07339, Q10567, P53675, P53634, P51688, P07602	5.01293	2.2275e-17
GOTERM_BP_DIRECT	GO:0016032~viral process	44	5.08671	3.86044e-10	Q16531, P25788, P29317, P25789, P30504, P16234, Q07021, Q14240, P31946, Q99436, P20618, P14324, P11142, Q7KZF4, P30479, P28062, E9PAV3, P08670, P30455, P28065, P61978, P63279, P16188, P30475, O60506, Q01105, Q9Y490, Q5T4S7, Q04637, P18462, P23142, P06748, P60842, P28072, P16190, P28070, O14818, P10809, P62258, Q07812, O14980, P61586, P02790, P49721, Q08431, P49720, P03956, O00410	2.93824	6.13994e-08
GOTERM_MF_DIRECT	GO:0003779~actin binding	42	4.85549	4.55377e-10	Q99439, Q9UPN3, Q01082, P18206, P02774, P07951, P04075, Q14019, P49006, C9J813, Q9Y4G6, Q01995, P07737, P52907, H7BYY1, P15311, Q9NVD7, Q5TCU3, O43707, Q14118, Q6ZN40, Q08043, P05556, Q01518, P26038, P60983, Q16643, O75369, P35579, Q13813, P35580, Q15149, P09493, Q15417, P35241, Q15746, P26447, P47755, Q05682, P06396, P47756, Q16658, P32455, Q96HC4, Q04917, P13796	3.01819	3.45386e-08
GOTERM_CC_DIRECT	GO:0005856~cytoskeleton	41	4.73988	1.03498e-06	Q99439, P07437, Q9UPN3, P80723, P18206, G5EA09, P52565, Q14019, P60709, C9J813, P35609, D6R904, Q16555, P07737, P52907, H7BYY1, P00491, P15311, P08670, A0A1C7CYX9, Q9NVD7, Q9BYX7, Q02952, P04264, Q14118, Q6ZN40, Q96AC1, K7ENT6, P26038, P08779, O00560, Q9Y4F1, Q562R1, P09972, Q14315, Q15149, P09493, P35241, Q05682, P06753, P47756, Q16658, P61586, Q6IBS0, P67936, Q15643, P04792, Q14247	2.3364	1.77096e-05
GOTERM_BP_DIRECT	GO:0006457~protein folding	41	4.73988	8.21902e-16	Q9H173, Q02790, P62942, Q14696, O95302, P27797, Q58FG1, Q9Y680, Q9Y536, P13667, P61604, P45877, P07900, P11142, P62873, Q58FF7, P14625, P62879, P50502, P48643, P50990, P50991, P26885, Q9Y266, O75347, Q16543, P30101, O43396, P27824, P49588, Q8NBS9, P30040, P62937, Q15084, P14314, P08238, P10599, Q9NZJ4, Q96AY3, Q9NQP4, Q9BS26	4.54797	3.70814e-13
GOTERM_CC_DIRECT	GO:0015629~actin cytoskeleton	41	4.73988	1.18346e-13	P46940, Q96TA1, P18206, Q9ULV4, P04075, C9J813, P23528, Q9Y4G6, Q12792, P52907, P15311, P61160, Q9Y696, Q09666, Q9NVD7, P29966, O43707, P46108, O15144, Q9Y281, O15145, P26639, P21333, O15511, Q16643, O75369, P60981, P35579, P35580, Q15417, P47755, Q05682, P06396, P36871, P47756, Q16658, Q96HC4, P68133, Q9NR12, P61158, P49720, P13796	3.97616	3.47156e-12
GOTERM_CC_DIRECT	GO:0042470~melanosome	40	4.62428	7.20172e-26	P07355, G5EA09, A6NMY6, H0Y3Z3, P31946, Q92820, P23526, P08133, P13667, P07900, Q7KZF4, P11142, P36955, P14625, P08195, Q00610, P11021, P50991, P08962, P50281, P35749, Q06830, P63104, P30101, P27824, O14773, P05556, P02786, Q8WUM4, P07858, P49327, O00560, P11279, P30040, Q15084, O75396, P08238, P62258, P23284, P07237, P07339, O43852	8.37288	4.43626e-24
GOTERM_BP_DIRECT	GO:0002576~platelet degranulation	39	4.50867	1.5538e-23	P02751, P01033, P18206, P13473, Q14624, P21926, P00441, P04075, P35609, P12814, P0DP23, Q16610, O00391, P05452, P05121, P09486, Q9BYX7, O43707, P08962, P07996, P01023, P07225, P02787, Q9Y490, P02768, P02765, P21333, P05067, O60245, Q92520, H0Y789, Q06481, P05155, P10124, P10909, Q99969, Q08380, O14498, P00746, P07602	7.56021	1.7299e-20
GOTERM_BP_DIRECT	GO:0043066~negative regulation of apoptotic process	39	4.50867	0.00137571	Q16531, Q96TA1, P01033, P52565, P23528, P18085, P50897, P30044, P14625, P09619, Q969H8, P68032, P11021, P08758, P61978, P07996, P48506, P32119, Q99497, P63104, P04083, P02788, P02768, Q8NBS9, P21333, Q04760, O00622, Q03405, P06748, P62987, P13693, O95865, H0Y789, P21980, P04156, P09211, P10809, P04179, P16070, P04792	1.71143	0.0416808
GOTERM_MF_DIRECT	GO:0004252~serine-type endopeptidase activity	37	4.27746	1.7094e-08	P43235, Q9NZP8, E9PQ70, P09871, P07711, Q8NBP7, P01834, P48740, P00751, P00750, P01857, P48147, P01859, Q92743, P50281, P01024, P25774, P06681, P00736, P01861, P02788, O14773, P07858, P09238, P0DOY2, P24347, P00742, P13497, P05156, P08254, P08253, P07339, P13798, Q6UXH9, P53634, P0C0L5, P00746, P03956	2.8987	1.05342e-06
GOTERM_MF_DIRECT	GO:0019899~enzyme binding	37	4.27746	1.1419e-05	Q14974, P42224, P13473, P62942, Q13185, Q14019, O76061, H0Y3Z3, P30086, P00505, Q9ULZ3, P31946, P61916, Q16610, P11142, P83916, P09619, P11021, P59998, P12004, P63279, P01023, P46108, P17066, Q99497, P68036, P54652, P11717, P05067, P11279, Q03405, O60888, P0DMV9, P62258, P32455, P07237, Q9H993, Q04917	2.21972	0.000363135
GOTERM_MF_DIRECT	GO:0051015~actin filament binding	36	4.16185	1.37968e-16	Q9UPN3, P07951, Q9ULV4, P23528, Q9Y4G6, P35609, D6R904, P12814, Q14651, H7BYY1, P61160, P15311, Q9H6X2, P29966, Q5TCU3, P59998, O43707, Q6ZN40, P35749, K7ENT6, Q9Y490, O15144, Q9Y281, O15145, P21333, O15511, P60981, P35579, Q14315, P35580, P09493, P13639, P06753, P47756, Q7Z406, Q16658, P67936, Q14847, P61158, P13797, P13796	5.44841	1.82077e-14
GOTERM_MF_DIRECT	GO:0008201~heparin binding	36	4.16185	8.99902e-14	P02751, P35442, P49746, P20908, P29279, P08603, P43034, O14786, P22105, P05452, P01008, P51858, P21246, Q99645, P07996, P08294, Q7Z7G0, P02788, A0A087WXW9, Q15113, P48745, O00622, Q9UHI8, Q12841, P05067, P35555, O14737, P51888, Q76M96, Q06481, P05154, P02649, O60462, P04004, Q15063, P07093, Q14767	4.49494	1.10973e-11
GOTERM_CC_DIRECT	GO:0005604~basement membrane	35	4.04624	1.40624e-24	P07355, P35442, P01033, P20908, Q96RW7, A6NMY6, P02462, P48509, P36955, P02458, P09486, P21246, P07942, P11047, Q14118, P98160, Q9Y4K0, Q14112, P14543, A0A087WXW9, Q9UHI8, P23142, P25391, Q16363, P35555, P55268, Q15582, O95967, P24043, O00339, Q76M96, H0Y789, P24821, O15230, P04004, P23229, P01034	9.3665	7.87495e-23
REACTOME_PATHWAY	R-HSA-3000178:R-HSA-3000178	35	4.04624	9.05196e-21	P02751, P05997, P20908, O00468, P13591, P02461, P02462, P22105, P06756, P02458, P05121, P09486, P07942, P11047, Q14118, P12110, P12111, P05556, P08572, A0A087WXW9, P02452, Q13332, P05067, P25391, Q16363, P55268, P08123, P24043, P07585, P24821, P51884, O15230, P12109, P04004, P21810, I3L3H7, P13611	6.94262	3.25418e-18
KEGG_PATHWAY	hsa01200:Carbon metabolism	35	4.04624	2.22391e-13	P00367, P04406, Q8N0Y7, P17174, P04075, P06733, P00505, P09622, P11766, P29401, O95336, P13929, Q9BWD1, P09104, P40925, P60174, P37837, P07205, P40926, Q9Y617, P18669, P06744, P48163, P19367, P09972, P00558, O75874, P52209, P30084, K7EM49, P14618, P15259, P07954, Q99798, P78330, P21399	4.26987	1.42322e-11
GOTERM_MF_DIRECT	GO:0005102~receptor binding	35	4.04624	0.000197686	Q9Y275, Q92692, P07737, P30479, O75144, P30044, P00750, P09619, Q8NFZ8, Q15257, P15151, P05121, P35475, P30455, P01024, P01023, P16188, Q99497, P30475, P04083, P22692, K7EKE8, P26038, Q13011, P18462, O14672, P05067, P25391, Q03405, Q9UKU9, Q16363, P14735, P24043, P0DMV9, P16190, O75874, P24592, Q99969, Q13740, P07093	1.98077	0.0044206
GOTERM_BP_DIRECT	GO:0045087~innate immune response	35	4.04624	0.00563592	P01876, P30504, Q9NZP8, Q07021, P09871, Q9ULZ3, P17931, P01834, P61769, P52907, P30479, P01857, Q9BWS9, P01859, P08174, Q9BUD6, P30475, P00736, P06681, P01861, P04083, P30530, Q9NPH3, P08779, P05067, P0DOY2, P62987, P09603, P05155, P47755, P05156, P26022, P10909, P09429, Q96PD5, P0C0L5	1.6252	0.125306
GOTERM_MF_DIRECT	GO:0005178~integrin binding	34	3.93064	3.68003e-18	P02751, P20908, P21926, P29279, P27797, H0Y3Z3, P04216, P02461, P35609, P48509, P12814, P22105, P16035, O43707, P50281, P07996, Q08043, Q9Y490, P05556, P05362, O75326, A0A087WXW9, Q9UBX5, P48745, O00622, P23142, O14672, P35555, P55268, Q15582, O43854, O15230, P07237, P04004, P23229, Q08431	6.46891	9.07129e-16
GOTERM_CC_DIRECT	GO:0043234~protein complex	34	3.93064	0.00224687	P46940, P07437, Q01082, P18206, P00441, Q02790, P16234, P60709, P00505, P31946, Q16555, P27348, P07900, P62879, P50502, A0A1C7CYX9, Q00610, O43707, P62805, Q6NZI2, P27824, P04083, P02788, Q01105, P12110, P02768, P61088, P35237, P35579, P07910, P05154, P12109, P10809, P10909, P31150	1.74469	0.0204686
KEGG_PATHWAY	hsa04512:ECM-receptor interaction	33	3.81503	1.84137e-15	P02751, P35442, P05997, P49746, P20908, O00468, P02461, P02462, P22105, P06756, P02458, P07942, P11047, P07996, Q14118, P98160, P12110, P12111, P05556, P08572, A0A087WXW9, P02452, P25391, P55268, Q16363, P08123, P24043, P24821, O15230, P12109, P04004, P31431, P23229, P16070, I3L3H7	5.22901	1.61093e-13
GOTERM_CC_DIRECT	GO:0009897~external side of plasma membrane	33	3.81503	6.41786e-09	P15291, P01130, P01876, P21926, P17813, P27797, P13591, H0Y3Z3, P04216, P01834, P61769, P06756, P01857, Q9H6X2, P01859, O75787, P08758, P07996, P54756, P01861, P05556, P02786, P00390, P05362, O75326, P11279, P0DOY2, P05154, P55290, P07237, Q13740, P23229, P15144, Q08431	3.27545	1.36324e-07
KEGG_PATHWAY	hsa04810:Regulation of actin cytoskeleton	32	3.69942	9.80911e-05	P46940, P02751, P18206, Q9GZP0, P16234, P60709, P23528, P35609, P12814, P07737, P19105, P15311, P06756, P09619, P59998, O43707, P46108, Q08043, P05556, O15144, P62140, Q9Y281, O15145, P26038, O15511, Q9NRA1, P35241, Q15746, P06396, P24844, P61586, P23229	2.10066	0.00139417
KEGG_PATHWAY	hsa04141:Protein processing in endoplasmic reticulum	31	3.58382	3.24452e-06	Q9H173, P17655, Q12907, P27797, H0Y3Z3, P13667, P11142, P07900, P14625, P63208, P11021, P55072, P17066, P30101, P27824, Q8NBS9, P54652, P07384, P30040, P54727, P0DMV9, Q15084, Q15436, P14314, Q9UKM7, P08238, Q9P2E9, Q07812, P07237, Q9Y4L1, P33908, Q92598	2.52871	6.92141e-05
KEGG_PATHWAY	hsa04144:Endocytosis	31	3.58382	0.00228668	Q96QK1, P61204, P01130, P30504, P16234, Q9NZN4, P63010, O75436, P52907, P11142, P30479, P30455, Q15075, Q00610, Q15907, P59998, P16188, P17066, P30475, O15144, P02786, O15145, Q8WUM4, P54652, P11717, P18462, O15511, P0DMV9, P16190, P47755, P47756, P61586, O95782, P53675, Q96CW1	1.77325	0.0231698
GOTERM_BP_DIRECT	GO:0010951~negative regulation of endopeptidase activity	30	3.46821	1.06584e-12	P10646, P01033, Q14624, P30086, Q6YHK3, P19823, P36955, P16035, P01008, P05121, P01024, P01023, Q99574, P07225, P04080, P30740, P12111, P02765, P35237, P50454, P05067, P20810, H0Y789, Q06481, P20742, P05154, P05155, Q08629, P04004, P07093, P0C0L5	4.95042	3.2362e-10
GOTERM_BP_DIRECT	GO:0043488~regulation of mRNA stability	29	3.3526	8.84437e-14	P25788, P25789, P25786, P31946, Q99436, A0A024RA52, P20618, P11142, P28062, P28065, Q16401, P63104, P28066, P27695, Q9UL46, Q01105, Q06323, Q04637, P62987, P0DMV9, P28072, P28070, O14818, O14980, Q14103, P60900, P49721, P04792, P49720	5.62169	3.28377e-11
GOTERM_BP_DIRECT	GO:0000165~MAPK cascade	29	3.3526	0.000127753	P25788, Q01082, P25789, P25786, P16234, P13591, P30086, P31946, Q15121, P35609, Q99436, A0A024RA52, P0DP23, P20618, P28062, P09619, P28065, Q16401, P28066, Q9UL46, Q06323, Q13813, P62987, P28072, P28070, O14818, P60900, P49721, P49720	2.21006	0.00567346
GOTERM_MF_DIRECT	GO:0005198~structural molecule activity	29	3.3526	4.54529e-05	E7EVA0, P07437, P18206, P35527, P27816, Q9Y4G6, P48681, P53621, Q9Y678, P13647, P08670, P13646, P02533, Q9BQE3, P07942, Q00610, P04264, P17661, O14579, P04083, P68363, P08779, P55268, P41219, P24043, Q03252, P02545, O15230, P20700, P53675	2.34554	0.00124416
GOTERM_BP_DIRECT	GO:0008283~cell proliferation	29	3.3526	0.0168329	Q9Y275, P09936, Q16576, P54687, P36955, P62873, Q969P0, P51858, Q9Y266, P12004, Q06830, P61224, P68036, P22692, P60033, P13010, O00622, P08779, Q15582, Q6UVK1, P35580, Q07954, P09603, O15230, H0YDL9, Q16658, P10599, P38571, Q15691, Q16881	1.58206	0.285023
GOTERM_BP_DIRECT	GO:0022617~extracellular matrix disassembly	28	3.23699	1.25428e-16	P17655, P02751, P01033, P43235, P17813, P07711, P16035, P11047, P50281, Q92743, P01023, P98160, P25774, P14543, O14672, P07384, P35555, P09238, P24347, P07585, H0Y789, P06396, P13497, P08254, P04632, P08253, P16070, P13796, P03956	7.35615	6.18394e-14
GOTERM_MF_DIRECT	GO:0005200~structural constituent of cytoskeleton	28	3.23699	3.47593e-12	P07437, Q01082, P04259, P35527, O00468, P60709, Q9Y4G6, Q14651, H7BYY1, P61160, P13647, P08670, P02533, Q9BQE3, P59998, P17661, Q6ZN40, Q9Y490, O15144, O15145, P26038, P68363, O15511, P08779, Q13813, P09493, P35908, P68133, Q13885, P61158	5.08519	3.11566e-10
GOTERM_MF_DIRECT	GO:0019904~protein domain specific binding	28	3.23699	5.33244e-06	P46940, P07437, P80723, Q14974, P13473, Q13185, P31946, Q9NZN4, P61981, P35609, P0DP23, P27348, P15311, P50502, P11021, P55072, P63104, P62805, Q9P0L0, P11279, Q03405, P35579, P35241, P21980, P06396, P62258, O14980, Q04917	2.68928	0.000202202
REACTOME_PATHWAY	R-HSA-1474228:R-HSA-1474228	27	3.12139	2.35265e-12	P17655, P02751, P43235, P07711, P07942, P11047, Q92743, P50281, P01023, P98160, P25774, P14543, Q9UHI8, O14672, P07384, P35555, P09238, P20810, P24347, P07585, P13497, O15230, P08254, P04632, P08253, P16070, P03956	5.14975	2.81929e-10
GOTERM_CC_DIRECT	GO:0030529~intracellular ribonucleoprotein complex	27	3.12139	9.45778e-10	P46940, Q12906, P04406, P60709, P31942, P11142, Q32P51, Q9UHX1, P05455, O43390, P10155, O43707, Q00839, P61978, O60506, D6R9P3, P22626, P05388, B2RXH8, P06748, Q99729, P07910, P13639, O14980, Q14103, P19338, Q15365, P38159	4.19722	2.15778e-08
GOTERM_BP_DIRECT	GO:0005975~carbohydrate metabolic process	27	3.12139	5.49382e-07	P16278, P15291, P07686, P46926, O00462, O00754, O95336, Q9BWS9, P08195, P10253, P35475, Q9BYZ2, P06865, P37837, P40925, P40926, Q9BTY2, P00338, Q04760, P06744, P07195, P48163, P17050, P36871, P36222, Q96G03, P15121	3.09828	5.56026e-05
GOTERM_BP_DIRECT	GO:0006898~receptor-mediated endocytosis	27	3.12139	2.00719e-06	P01130, P01876, P27797, P01834, P48740, P07900, P50897, P14625, P09486, Q00610, Q9Y4K0, P69905, Q01518, P02768, P11717, P0DOY2, Q07954, P02649, P05156, Q9NR12, P04004, Q08380, P02790, P53675, Q9Y4L1, Q92598, Q14247	2.89839	0.000163499
GOTERM_CC_DIRECT	GO:0045121~membrane raft	27	3.12139	4.90736e-06	P07355, P46940, P17655, P18206, G5EA09, P35052, P04216, P50897, Q09666, Q8IWU6, P08174, Q14118, Q99497, P61224, Q6NZI2, P05556, P05362, O00560, P05067, P07195, P50454, P19367, P04156, P13639, P10809, P00558, P07339, P31431	2.77098	7.37275e-05
GOTERM_BP_DIRECT	GO:0001525~angiogenesis	27	3.12139	5.30632e-05	P07355, P02751, P29279, P04216, O14786, Q16610, Q9Y696, P06756, Q969H8, P05121, P50281, P98160, P08572, Q9NZ08, P48745, P06744, Q15582, Q6UVK1, P35579, P06576, O15230, O60462, P08253, P15144, Q08431, P19338, P23381	2.41749	0.00272299
REACTOME_PATHWAY	R-HSA-2467813:R-HSA-2467813	27	3.12139	0.000250858	P25788, P25789, P25786, P30153, P43034, Q99436, A0A024RA52, P20618, P28062, Q9BQE3, P28065, Q9Y266, Q16401, P28066, Q9UL46, Q06323, P68363, P62987, P28072, P28070, O14818, O14980, Q15691, Q13885, P60900, P49721, P49720	2.17125	0.00277138
KEGG_PATHWAY	hsa05205:Proteoglycans in cancer	27	3.12139	0.00240703	P46940, P02751, P60709, P07711, P35052, P15311, P06756, P07996, P08962, P98160, P34741, P05556, P62140, P26038, P21333, Q03405, O75369, Q14315, P07585, P35241, P51884, P61586, P08253, P31431, P04004, P16070, Q14247	1.86105	0.0234492
GOTERM_BP_DIRECT	GO:0042493~response to drug	27	3.12139	0.00545172	P42224, Q13867, P00441, P27797, P19021, Q92820, Q16555, P61769, P16035, P07900, P00491, P13929, A0A1C7CYX9, P68032, P09382, P21246, P07996, P08476, P27695, P04083, P05362, P02452, P00338, P13010, P10809, P04179, O14980, I3L3H7, P01034	1.77336	0.123095
GOTERM_BP_DIRECT	GO:0030574~collagen catabolic process	26	3.00578	1.22683e-16	P05997, P20908, P43235, P12955, P07711, Q99715, P02461, P02462, P02458, Q03692, P50281, P25774, P12110, P12111, P08572, A0A087WXW9, P07858, P02452, Q9UBG0, P09238, P08123, P24347, P12109, P08254, P08253, P07339, I3L3H7, P03956	8.11147	7.41629e-14
GOTERM_BP_DIRECT	GO:0060071~Wnt signaling pathway, planar cell polarity pathway	26	3.00578	1.90963e-12	P25788, P25789, P25786, P63010, Q99436, P20618, A0A024RA52, P07737, P28062, Q00610, P28065, Q16401, P28066, Q9UL46, Q06323, Q96CG8, P62987, P28072, P28070, O14818, P61586, O95782, P60900, P49721, P49720, Q96CW1	5.64276	4.90616e-10
REACTOME_PATHWAY	R-HSA-1236974:R-HSA-1236974	26	3.00578	1.03093e-10	P25788, P25789, P25786, P30504, P27797, Q99436, A0A024RA52, P20618, P61769, P28062, P30479, P30455, P28065, P16188, Q16401, P28066, P30475, P30101, Q9UL46, Q06323, P18462, P62987, P28072, O75396, P16190, P28070, O14818, P60900, P49721, P49720	4.6048	9.26547e-09
REACTOME_PATHWAY	R-HSA-216083:R-HSA-216083	26	3.00578	1.81156e-10	P02751, P05997, P20908, O00468, P02461, P02462, P06756, P02458, Q03692, P07996, P98160, Q14118, P12110, P12111, P05556, P08572, P05362, A0A087WXW9, P02452, P35555, P08123, P24821, P51884, P12109, P04004, P23229, P16070, I3L3H7	4.49771	1.30251e-08
GOTERM_CC_DIRECT	GO:0031982~vesicle	26	3.00578	1.24426e-09	P07355, P04406, P80723, Q9ULV4, P37802, P23528, O75436, P29401, P0DP23, P15311, P62879, Q09666, Q9BQE3, Q9UHL4, Q9P0L0, P02787, P04083, P60033, P60660, P26038, P50395, O00299, P09211, H0YDL9, P61586, P14618, P01034	4.29437	2.73737e-08
GOTERM_MF_DIRECT	GO:0051082~unfolded protein binding	26	3.00578	1.32275e-10	Q9H173, Q16543, P27824, P27797, P54652, Q58FG1, P50454, P06748, P0DMV9, P61604, P62937, P07900, P11142, Q58FF7, P08238, P14625, P10809, P23284, P50502, P48643, P50990, P11021, P50991, Q9NQP4, Q9Y266, P17066	4.72196	1.08686e-08
GOTERM_BP_DIRECT	GO:0016477~cell migration	26	3.00578	1.52433e-06	Q15262, P29317, P20908, P19022, P17813, P29279, P48509, P18085, P06756, P09619, Q9HCU0, P11047, P08962, P07996, P34741, P05556, A0A087WXW9, Q96CG8, O15511, Q5TG12, Q14517, Q6UVK1, Q13308, O15230, Q16658, P61586, P31431, P13796	3.01822	0.000145454
KEGG_PATHWAY	hsa04145:Phagosome	26	3.00578	6.43369e-05	P35442, P07437, P49746, P13473, P30504, P27797, P60709, P07711, P30479, P06756, Q9BQE3, Q15904, Q15075, P30455, P07996, P01024, P16188, P25774, P00736, P30475, P27824, P05556, P02786, P68363, P18462, Q9UBG0, P11279, O75396, P16190, Q13885	2.3895	0.000968401
GOTERM_CC_DIRECT	GO:0043025~neuronal cell body	26	3.00578	0.00807809	Q15262, P09936, O60391, P00441, P16870, Q02790, Q9ULZ3, P43034, O14786, Q16555, P50897, P16035, P07900, A0A1C7CYX9, P54756, P27824, P48745, P21333, Q5TG12, P11279, P35580, Q07954, Q15417, P02649, Q9Y5S9, Q13740, P0C0L5, P01034	1.74502	0.0628268
GOTERM_CC_DIRECT	GO:0005759~mitochondrial matrix	26	3.00578	0.01257	P43251, O14561, P00367, Q9NX46, P40926, P00441, P00390, Q8NCW5, Q07021, P00505, P41250, P09622, P61604, P06576, P30044, P49590, P31937, P10809, P04179, P30084, Q9Y3B8, P30049, P07954, Q99798, Q9BYZ2, Q99497	1.68098	0.0885917
GOTERM_BP_DIRECT	GO:0051603~proteolysis involved in cellular protein catabolic process	25	2.89017	4.2804e-19	P10619, P17655, P25788, P25789, P25786, P43235, P07858, P07711, Q99538, P14735, Q99436, A0A024RA52, P20618, P28072, P28062, P28070, O14818, Q9UBR2, P11021, P60900, P28065, P49721, P53634, P49720, P25774	10.3993	3.57413e-16
REACTOME_PATHWAY	R-HSA-1442490:R-HSA-1442490	25	2.89017	8.76511e-13	P05997, P20908, P43235, P07711, Q99715, P02461, P02462, P02458, Q03692, Q05707, P50281, P12110, P12111, P08572, A0A087WXW9, P07858, P02452, O14672, P09238, P08123, P24347, P12109, P08254, P08253, P07339, I3L3H7, P03956	5.81135	1.26044e-10
GOTERM_BP_DIRECT	GO:0090090~negative regulation of canonical Wnt signaling pathway	25	2.89017	1.94572e-06	P25788, P25789, P25786, P19022, Q99436, P20618, A0A024RA52, P28062, P28065, Q9UBP4, Q16401, P28066, Q9UL46, P22692, Q06323, Q96CG8, P62987, P28072, P02649, P28070, O14818, P24592, P60900, P49721, P49720	3.06238	0.000166619
GOTERM_BP_DIRECT	GO:0043161~proteasome-mediated ubiquitin-dependent protein catabolic process	25	2.89017	8.15202e-05	Q16531, P09936, P25788, P25789, P25786, Q99436, P20618, A0A024RA52, P28062, P63208, P28065, P55072, Q16401, P28066, Q9UL46, Q06323, P61086, P62987, P54727, P28072, P28070, O14818, P60900, P49721, P49720	2.45895	0.00399624
GOTERM_CC_DIRECT	GO:0005765~lysosomal membrane	25	2.89017	0.0027769	P07355, Q96QK1, P10619, A0A0A0MRU5, Q96JI7, P13473, P22314, P11717, P11279, P08133, P62987, Q07954, P11142, P62873, P12109, P08238, P10253, P62879, Q09666, Q10567, P08962, P15144, Q96CW1, P07602, Q6EMK4	1.92897	0.0248758
REACTOME_PATHWAY	R-HSA-450408:R-HSA-450408	24	2.77457	2.6803e-13	P25788, Q9UL46, P25789, P25786, Q06323, Q04637, Q99436, P62987, A0A024RA52, P20618, P0DMV9, P11142, P28072, P28062, P28070, O14818, P60900, Q14103, P49721, P28065, P49720, P04792, P28066, Q16401	6.37588	4.81744e-11
GOTERM_BP_DIRECT	GO:0006928~movement of cell or subcellular component	24	2.77457	2.10566e-11	P07437, P18206, P21926, P52565, P60709, C9J813, D6R904, P52907, P61160, H7BYY1, Q969P0, P08670, Q6ZN40, K7ENT6, Q9Y490, O15144, O15145, P26038, O15511, Q03405, P09493, P47755, Q05682, P06753, P47756, P10599, P67936, P61158, P04792	5.5721	4.137e-09
KEGG_PATHWAY	hsa00010:Glycolysis / Gluconeogenesis	24	2.77457	9.48464e-11	P07205, P60174, P04406, Q8N0Y7, P18669, P06733, P04075, P00338, P06744, P07195, P09622, P11766, P19367, P09972, P36871, P13929, P00558, Q96G03, Q9UNW1, P14550, P09104, P14618, P15259, Q9BYZ2	4.93812	4.04678e-09
KEGG_PATHWAY	hsa05146:Amoebiasis	24	2.77457	1.38064e-06	P02751, P05997, P18206, P20908, P02461, P35609, P02462, P12814, P02458, P07942, P11047, O43707, P30740, Q08043, P08572, A0A087WXW9, P02452, P35237, Q16363, P55268, P25391, P08123, P24043, O15230, I3L3H7, P04792	3.12126	3.21307e-05
GOTERM_BP_DIRECT	GO:0038095~Fc-epsilon receptor signaling pathway	24	2.77457	2.82724e-05	P25788, Q9UL46, P25789, P25786, Q06323, P61088, Q99436, P0DOY2, P62987, A0A024RA52, P20618, P0DP23, P01834, P28072, P28062, P28070, O14818, P63208, P60900, P28065, P49721, P49720, P28066, Q16401	2.69214	0.00165532
GOTERM_BP_DIRECT	GO:0010628~positive regulation of gene expression	24	2.77457	0.00632396	Q99439, P08476, P02751, Q96QK1, P01130, P17813, P26038, P27797, P29279, P23142, P30040, P0DMV9, O14737, P24821, P09603, P35241, P15311, P06396, P08670, P68032, P68133, Q14103, Q00839, Q99497	1.82901	0.13772
KEGG_PATHWAY	hsa05203:Viral carcinogenesis	24	2.77457	0.0229535	Q16531, Q08043, P30504, Q5T4S7, P18462, P31946, Q16778, P61981, P35609, P12814, Q7KZF4, P27348, P16190, P30479, P06396, Q07812, P62258, P61586, P30455, Q04917, P14618, O43707, P01024, P61978, P16188, P30475, P62805, P63104	1.61392	0.134969
GOTERM_CC_DIRECT	GO:1903561~extracellular vesicle	23	2.65896	1.25258e-16	P12110, P18206, P12111, P21926, P02786, P22061, Q8WUM4, G5EA09, Q99715, O00560, P16152, O95967, Q13813, P51888, O43854, P62873, P02649, Q9UKM7, Q9NRN5, Q00610, P14618, Q13885, P07093, Q08431	9.7251	3.9968e-15
GOTERM_BP_DIRECT	GO:0045454~cell redox homeostasis	23	2.65896	1.36436e-11	P27695, Q9H299, O43396, P30101, P02788, P00390, Q8NBS9, H0Y3Z3, P09622, P13667, P30041, Q15084, P35754, P30044, O00391, P10599, O95881, P07237, Q16881, O76003, P32119, P48506, Q06830, Q9BS26	5.96408	3.25498e-09
GOTERM_BP_DIRECT	GO:0033209~tumor necrosis factor-mediated signaling pathway	23	2.65896	8.00946e-08	Q9Y275, P25788, Q9UL46, P25789, P42224, P25786, Q9BRA2, Q06323, Q9ULZ3, Q99436, P62987, A0A024RA52, P20618, P28072, P28062, P28070, O14818, P60900, P28065, P49721, P49720, P28066, Q16401	3.89182	8.91716e-06
GOTERM_BP_DIRECT	GO:0002479~antigen processing and presentation of exogenous peptide antigen via MHC class I, TAP-dependent	23	2.65896	1.37837e-13	P25788, P25789, P25786, P30504, Q99436, A0A024RA52, P20618, P61769, P28062, P30479, P06756, P30455, P28065, P16188, Q16401, P28066, P30475, Q9UL46, Q06323, P18462, P28072, P16190, P28070, O14818, P60900, P49721, P49720	7.28943	4.60552e-11
KEGG_PATHWAY	hsa01230:Biosynthesis of amino acids	23	2.65896	3.05658e-09	P07205, P60174, P04406, P37837, Q8N0Y7, Q9Y617, P18669, P17174, P06733, P04075, P00505, P54687, P29401, P09972, P13929, O75874, P00558, P09104, P14618, P15259, Q99798, P78330, P21399	4.40372	1.11784e-07
GOTERM_MF_DIRECT	GO:0005201~extracellular matrix structural constituent	23	2.65896	5.80353e-13	P05997, P20908, P08572, A0A087WXW9, P02452, Q92626, P23142, P02461, P25391, P35555, Q16363, P08123, O95967, P02462, P51888, P22105, P51884, P02458, P36222, P21810, P07942, P11047, Q05707, I3L3H7, P13611	6.85795	5.72189e-11
GOTERM_MF_DIRECT	GO:0030246~carbohydrate binding	23	2.65896	0.000332035	P27824, Q7Z7M9, Q12907, Q9Y2E5, P27797, Q86SR1, P17931, Q04446, Q9UBG0, Q9Y240, Q15155, O00754, Q16706, P10253, P05452, P36222, Q9HCU0, O75882, P04264, P0C0L5, P13611, Q10472, Q10471	2.3443	0.00679848
GOTERM_MF_DIRECT	GO:0031625~ubiquitin protein ligase binding	23	2.65896	0.0310937	P07437, P60174, P09936, P68036, P18206, P27797, P61088, P68363, P13010, Q96FW1, P06744, P61086, P0DMV9, P30041, P11142, P62258, P10809, P10909, P11021, P55957, P63279, P55072, P63104	1.60099	0.289832
REACTOME_PATHWAY	R-HSA-2871837:R-HSA-2871837	23	2.65896	0.000106788	P25788, Q9UL46, P25789, P25786, Q06323, P61088, Q99436, P0DOY2, P62987, A0A024RA52, P20618, P01834, P28072, P28062, P28070, O14818, P63208, P60900, P28065, P49721, P49720, P28066, Q16401	2.49761	0.00125797
GOTERM_BP_DIRECT	GO:0030335~positive regulation of cell migration	23	2.65896	0.000134905	Q9GZP0, G5EA09, P16234, P06756, P09619, P07942, Q13214, P11021, O43707, P50281, P07996, O75326, P02452, O00622, O14672, O00560, Q9NRA1, P09603, P00742, P35241, Q15746, P55290, Q15691, I3L3H7, P23229	2.49584	0.00591157
GOTERM_BP_DIRECT	GO:0000209~protein polyubiquitination	23	2.65896	0.000134905	P25788, Q9UL46, P25789, P68036, P25786, Q13867, Q06323, Q99436, P62987, A0A024RA52, P20618, P28072, P28062, P28070, O14818, P63208, P55786, P60900, P28065, P49721, P49720, P28066, Q16401	2.49584	0.00591157
GOTERM_CC_DIRECT	GO:0030424~axon	23	2.65896	0.000859811	P46940, Q15262, P27824, Q96JI7, P42224, Q12852, P48745, P41250, P58546, Q5TG12, P05067, O14786, P35580, P50897, O60462, P62258, Q7Z406, Q9NZJ4, Q13740, Q14563, P0C0L5, Q99497, P01034, P54756	2.19034	0.00864879
GOTERM_BP_DIRECT	GO:0001649~osteoblast differentiation	22	2.54335	3.71908e-08	K7ENT6, P84090, P29317, O75326, P02452, O00622, P49327, Q9UBG0, P17936, P61604, P24821, P06576, Q7KZF4, P07910, P12109, Q9P2E9, P67936, P24593, Q00610, I3L3H7, Q00839, P13611, P38159, O60506	4.22373	4.60063e-06
GOTERM_BP_DIRECT	GO:0050852~T cell receptor signaling pathway	22	2.54335	1.50386e-05	P25788, Q9UL46, P25789, P25786, Q06323, P61088, P04216, Q99436, P62987, A0A024RA52, P20618, P28072, P28062, P28070, O14818, P63208, P60900, P28065, P49721, P49720, P28066, Q16401	2.96802	0.00096548
GOTERM_CC_DIRECT	GO:0000502~proteasome complex	22	2.54335	1.58408e-13	O43396, P25788, Q9UL46, P25789, P25786, Q06323, Q99436, A0A024RA52, P54727, P20618, P28072, P28062, P28070, O14818, P60900, P28065, P49721, P49720, P55072, P04792, P28066, Q16401	7.75189	4.43601e-12
GOTERM_MF_DIRECT	GO:0005518~collagen binding	22	2.54335	4.66833e-13	P02751, Q7Z7G0, P14543, Q14112, P43235, Q15113, P07858, P07711, Q9UBG0, P50454, Q15582, P07585, P51884, P23284, Q9H6X2, P10124, P09486, Q16832, P04004, Q05707, P16070, P25774	7.32509	5.11459e-11
GOTERM_BP_DIRECT	GO:0006888~ER to Golgi vesicle-mediated transport	22	2.54335	4.93114e-05	Q9P0L0, Q96FJ2, Q01082, Q12907, Q13813, P53621, Q15436, P00742, P18085, O75396, Q9Y678, Q9UBR2, Q14203, P48444, Q5JRA6, P08174, Q9Y4L1, P53634, P55072, Q8NI22, P07225, O14579	2.74542	0.00265299
GOTERM_BP_DIRECT	GO:0007010~cytoskeleton organization	22	2.54335	5.4095e-05	Q99439, Q9UPN3, Q01082, Q92692, P04259, K7EKE8, P26038, O00468, P60709, P08779, P23528, P04216, Q13813, Q16555, P09493, H7BYY1, P02649, O15230, P47756, P13647, P13646, A0A1C7CYX9, Q9BQE3, Q13885, P17661, Q6ZN40	2.72837	0.00273386
GOTERM_BP_DIRECT	GO:0008152~metabolic process	22	2.54335	0.000100865	Q16851, P16278, Q96CN7, P16870, P78417, Q13011, P49327, P15289, P54687, P29401, Q6P587, P04156, Q9UKM7, Q96KP4, P09211, P34059, Q8IWU6, O75787, Q99798, P22304, P51688, P21399	2.61469	0.00466834
REACTOME_PATHWAY	R-HSA-3000171:R-HSA-3000171	21	2.42775	9.80836e-14	P02751, P05997, P20908, P08572, A0A087WXW9, P02452, O00468, P02461, P25391, P55268, Q16363, P08123, P02462, P24043, O15230, P02458, Q16832, P07942, Q03692, P11047, I3L3H7, P98160, Q14118	7.81045	2.34952e-11
REACTOME_PATHWAY	R-HSA-5358346:R-HSA-5358346	21	2.42775	8.32303e-10	P25788, Q9UL46, P25789, P25786, Q06323, H0Y3Z3, Q99436, P62987, A0A024RA52, P20618, P28072, P28062, P28070, O14818, P07237, P60900, P28065, P49721, P55072, P49720, P28066, Q16401	5.20697	3.74016e-08
REACTOME_PATHWAY	R-HSA-1650814:R-HSA-1650814	21	2.42775	7.36522e-09	Q02809, P05997, P12110, P12111, P20908, P08572, A0A087WXW9, P02452, Q15113, H0Y3Z3, Q99715, P50454, P02461, P08123, P02462, O60568, P13497, P12109, P23284, P02458, P07237, Q03692, Q05707, I3L3H7	4.66296	1.89128e-07
REACTOME_PATHWAY	R-HSA-195253:R-HSA-195253	21	2.42775	9.78975e-09	P25788, Q9UL46, P25789, P25786, Q06323, P30153, Q99436, P62987, A0A024RA52, P20618, P28072, P28062, P28070, O14818, P63208, P60900, P28065, P49721, P49720, P28066, Q16401	4.59438	2.27059e-07
KEGG_PATHWAY	hsa04610:Complement and coagulation cascades	21	2.42775	4.37821e-08	P10646, P08603, P09871, Q03405, P48740, P00742, P00751, P05154, P00750, P05155, P05156, P01008, P05121, P08174, P01024, P01023, P0C0L5, P00746, P00736, P06681, P07225	4.19561	1.24536e-06
REACTOME_PATHWAY	R-HSA-5607764:R-HSA-5607764	21	2.42775	1.96253e-07	P25788, Q9UL46, P25789, P25786, Q06323, P61088, Q99436, P62987, A0A024RA52, P20618, P28072, P28062, P28070, O14818, P63208, P60900, P28065, P49721, P49720, P28066, Q16401	3.90523	3.44161e-06
GOTERM_BP_DIRECT	GO:0002223~stimulatory C-type lectin receptor signaling pathway	21	2.42775	2.15065e-07	P25788, Q9UL46, P25789, P25786, Q06323, P61088, Q99436, P62987, A0A024RA52, P20618, P28072, P28062, P28070, O14818, P63208, P60900, P28065, P49721, P49720, P28066, Q16401	3.99334	2.24471e-05
KEGG_PATHWAY	hsa04612:Antigen processing and presentation	21	2.42775	2.55551e-07	P34932, P30504, P27797, P07711, Q99538, P61769, P07900, P11142, P30479, P30455, P25774, P17066, P16188, P30475, P30101, Q9UL46, P27824, P07858, Q06323, P54652, P18462, P0DMV9, P16190, P08238, P13284	3.80917	6.54207e-06
GOTERM_MF_DIRECT	GO:0004867~serine-type endopeptidase inhibitor activity	21	2.42775	5.37944e-08	P10646, P30740, P12111, Q14624, P30086, P50454, P35237, P05067, Q6YHK3, P19823, Q06481, P20742, P36955, P05154, P05155, P05121, P01008, Q08629, P07093, P01023, Q99574	4.32503	2.79164e-06
GOTERM_BP_DIRECT	GO:0090263~positive regulation of canonical Wnt signaling pathway	21	2.42775	1.97474e-06	Q96QK1, P25788, Q9UL46, P25789, P25786, P02452, Q06323, Q99436, P62987, A0A024RA52, P20618, P28072, P28062, P28070, O14818, P60900, I3L3H7, P28065, P49721, P49720, P28066, Q16401	3.49417	0.000164878
REACTOME_PATHWAY	R-HSA-202424:R-HSA-202424	21	2.42775	9.7635e-06	P25788, Q9UL46, P25789, P25786, Q06323, P61088, Q99436, P62987, A0A024RA52, P20618, P28072, P28062, P28070, O14818, P63208, P60900, P28065, P49721, P49720, P28066, Q16401	3.09325	0.000132444
REACTOME_PATHWAY	R-HSA-2132295:R-HSA-2132295	21	2.42775	0.000162994	P10619, P27824, Q96FJ2, P43235, P07858, P68363, P07711, Q99538, P63010, Q15436, Q14203, Q9BQE3, P07339, Q00610, Q10567, O95782, Q13885, P13284, P53634, Q96CW1, P25774	2.5608	0.00185862
GOTERM_CC_DIRECT	GO:0005911~cell-cell junction	21	2.42775	0.000185498	P07355, P46940, Q99439, Q15262, P18206, Q92692, Q9Y490, K7EKE8, P19022, P21333, Q5TG12, P05067, Q9Y4G6, Q12792, Q14517, P12814, Q13308, Q9Y696, Q16658, Q9NR12, O43707, P61158, P61224	2.58123	0.00223823
GOTERM_BP_DIRECT	GO:0007568~aging	21	2.42775	0.000222635	P27695, P27824, P01033, P00441, P29279, P08779, P02461, P09622, Q07954, P07585, H0Y789, P48637, P16035, P36955, P13639, P05155, P13929, P02533, P24593, P53634, P48506, Q9Y4K0	2.54122	0.00892002
GOTERM_BP_DIRECT	GO:0042981~regulation of apoptotic process	21	2.42775	0.00515228	Q08043, P42224, P27797, P07858, Q99988, O60361, Q15121, P17936, P35609, P15531, P12814, P13693, Q53FA7, P13497, Q07812, P09382, P55957, O43707, Q9NQC3, P32119, P55072	1.96855	0.118328
GOTERM_BP_DIRECT	GO:0006886~intracellular protein transport	21	2.42775	0.0148507	Q9H173, Q96QK1, P10619, Q14974, P63010, P30040, O75436, P06748, P53621, Q15436, Q9Y678, O14980, Q04917, P48444, Q00610, Q10567, O95782, P53675, Q96CW1, O00410, Q14247	1.7767	0.262667
GOTERM_BP_DIRECT	GO:0038061~NIK/NF-kappaB signaling	20	2.31214	2.93493e-10	P25788, Q9UL46, P25789, P25786, Q06323, Q99436, P62987, A0A024RA52, P20618, P28072, P28062, P28070, O14818, P63208, P60900, P28065, P49721, P49720, P28066, Q16401	6.05052	4.90134e-08
GOTERM_CC_DIRECT	GO:0031093~platelet alpha granule lumen	20	2.31214	2.99524e-12	P02751, P01033, P02768, P02765, P04075, P05067, P35609, P12814, H0Y789, O00391, P05155, P10124, P05121, P09486, P10909, O43707, P07996, O14498, P01023, P00746, P07225	7.68783	7.68786e-11
REACTOME_PATHWAY	R-HSA-180534:R-HSA-180534	20	2.31214	3.64687e-10	P25788, Q9UL46, P25789, P25786, Q06323, Q99436, P62987, A0A024RA52, P20618, P28072, P28062, P28070, O14818, P63208, P60900, P28065, P49721, P49720, P28066, Q16401	5.72194	2.017e-08
REACTOME_PATHWAY	R-HSA-174113:R-HSA-174113	20	2.31214	1.10686e-09	P25788, Q9UL46, P25789, P25786, Q06323, Q99436, P62987, A0A024RA52, P20618, P28072, P28062, P28070, O14818, P63208, P60900, P28065, P49721, P49720, P28066, Q16401	5.40984	4.68135e-08
REACTOME_PATHWAY	R-HSA-5362768:R-HSA-5362768	20	2.31214	1.57185e-09	P25788, Q9UL46, P25789, P25786, Q06323, Q99436, P62987, A0A024RA52, P20618, P28072, P28062, P28070, O14818, P60900, P28065, P49721, P55072, P49720, P28066, Q16401	5.31323	5.94823e-08
GOTERM_BP_DIRECT	GO:0051437~positive regulation of ubiquitin-protein ligase activity involved in regulation of mitotic cell cycle transition	20	2.31214	4.03795e-09	P25788, Q9UL46, P25789, P25786, Q06323, Q99436, P62987, A0A024RA52, P20618, P28072, P28062, P28070, O14818, P63208, P60900, P28065, P49721, P49720, P28066, Q16401	5.2544	5.86381e-07
REACTOME_PATHWAY	R-HSA-5676590:R-HSA-5676590	20	2.31214	4.2725e-09	P25788, Q9UL46, P25789, P25786, Q06323, Q99436, P62987, A0A024RA52, P20618, P28072, P28062, P28070, O14818, P63208, P60900, P28065, P49721, P49720, P28066, Q16401	5.04307	1.27997e-07
REACTOME_PATHWAY	R-HSA-5610785:R-HSA-5610785	20	2.31214	5.86674e-09	P25788, Q9UL46, P25789, P25786, Q06323, Q99436, P62987, A0A024RA52, P20618, P28072, P28062, P28070, O14818, P63208, P60900, P28065, P49721, P49720, P28066, Q16401	4.95902	1.62238e-07
REACTOME_PATHWAY	R-HSA-5607761:R-HSA-5607761	20	2.31214	5.86674e-09	P25788, Q9UL46, P25789, P25786, Q06323, Q99436, P62987, A0A024RA52, P20618, P28072, P28062, P28070, O14818, P63208, P60900, P28065, P49721, P49720, P28066, Q16401	4.95902	1.62238e-07
REACTOME_PATHWAY	R-HSA-5610780:R-HSA-5610780	20	2.31214	5.86674e-09	P25788, Q9UL46, P25789, P25786, Q06323, Q99436, P62987, A0A024RA52, P20618, P28072, P28062, P28070, O14818, P63208, P60900, P28065, P49721, P49720, P28066, Q16401	4.95902	1.62238e-07
REACTOME_PATHWAY	R-HSA-187577:R-HSA-187577	20	2.31214	5.86674e-09	P25788, Q9UL46, P25789, P25786, Q06323, Q99436, P62987, A0A024RA52, P20618, P28072, P28062, P28070, O14818, P63208, P60900, P28065, P49721, P49720, P28066, Q16401	4.95902	1.62238e-07
REACTOME_PATHWAY	R-HSA-5610783:R-HSA-5610783	20	2.31214	5.86674e-09	P25788, Q9UL46, P25789, P25786, Q06323, Q99436, P62987, A0A024RA52, P20618, P28072, P28062, P28070, O14818, P63208, P60900, P28065, P49721, P49720, P28066, Q16401	4.95902	1.62238e-07
REACTOME_PATHWAY	R-HSA-5678895:R-HSA-5678895	20	2.31214	7.99517e-09	P25788, Q9UL46, P25789, P25786, Q06323, Q99436, P62987, A0A024RA52, P20618, P28072, P28062, P28070, O14818, P60900, P28065, P49721, P55072, P49720, P28066, Q16401	4.87772	1.98225e-07
REACTOME_PATHWAY	R-HSA-1169091:R-HSA-1169091	20	2.31214	4.43824e-08	P25788, Q9UL46, P25789, P25786, Q06323, Q99436, P62987, A0A024RA52, P20618, P28072, P28062, P28070, O14818, P63208, P60900, P28065, P49721, P49720, P28066, Q16401	4.44091	9.11742e-07
REACTOME_PATHWAY	R-HSA-5668541:R-HSA-5668541	20	2.31214	7.48433e-08	Q9Y275, P25788, Q9UL46, P25789, P25786, Q06323, Q99436, P62987, A0A024RA52, P20618, P28072, P28062, P28070, O14818, P60900, P28065, P49721, P49720, P28066, Q16401	4.31219	1.49479e-06
GOTERM_MF_DIRECT	GO:0032403~protein complex binding	20	2.31214	0.00754991	P46940, P27695, Q15631, P07437, Q01082, P05556, P43034, P23142, P31946, Q12792, P35555, P63010, Q07954, P62873, P23284, P62879, P50502, O95782, Q14118, P61224	1.93956	0.096048
REACTOME_PATHWAY	R-HSA-382556:R-HSA-382556	20	2.31214	2.06096e-06	P25788, Q9UL46, P25789, P25786, Q06323, Q99436, P62987, A0A024RA52, P20618, P28072, P28062, P28070, O14818, P60900, P28065, P49721, P55072, P49720, P28066, Q16401	3.54215	3.0871e-05
REACTOME_PATHWAY	R-HSA-5687128:R-HSA-5687128	20	2.31214	4.31309e-06	P25788, Q9UL46, P25789, P25786, Q06323, Q99436, P62987, A0A024RA52, P20618, P28072, P28062, P28070, O14818, P60900, P28065, P49721, P04792, P49720, P28066, Q16401	3.38115	6.20205e-05
GOTERM_BP_DIRECT	GO:0044267~cellular protein metabolic process	20	2.31214	5.98228e-06	P02788, P22692, O14933, P05067, P07686, P17936, Q15582, P62987, P61769, P06396, P08253, Q9Y287, P24592, P24593, Q08431, P98160, Q13219, P62805, P01034, P03956	3.38419	0.000443921
GOTERM_BP_DIRECT	GO:0001501~skeletal system development	20	2.31214	5.21391e-05	P05997, P29317, P22692, Q16394, P02765, P02452, Q99715, P02461, P07686, P35555, P55287, P08123, P51888, Q8IUX7, P13497, P02458, Q03692, Q15063, I3L3H7, Q06830, P13611	2.91485	0.00276045
GOTERM_CC_DIRECT	GO:0030027~lamellipodium	20	2.31214	0.000202495	Q9H299, P29317, P05556, O15145, Q9ULV4, P19022, Q14517, P35580, Q15746, P35241, P47756, Q16658, Q9NVD7, P61586, P68032, Q6IBS0, P68133, P61158, Q14118, Q14247	2.64269	0.00239616
REACTOME_PATHWAY	R-HSA-2022090:R-HSA-2022090	19	2.19653	2.84517e-10	P05997, P12110, P20908, P12111, P08572, A0A087WXW9, P02452, P07858, P07711, P02461, P08123, P02462, P48509, Q15149, P12109, P02458, P08254, Q03692, P23229, I3L3H7, P25774	6.14487	1.85971e-08
REACTOME_PATHWAY	R-HSA-211733:R-HSA-211733	19	2.19653	1.41272e-09	P25788, Q9UL46, P25789, P25786, Q06323, Q99436, P62987, A0A024RA52, P20618, P28072, P28062, P28070, O14818, P60900, P28065, P49721, P49720, P28066, Q16401	5.65328	5.64302e-08
REACTOME_PATHWAY	R-HSA-1236978:R-HSA-1236978	19	2.19653	1.41272e-09	P25788, Q9UL46, P25789, P25786, Q06323, Q9UBG0, Q99436, A0A024RA52, P20618, P28072, P28062, P28070, O14818, P60900, P28065, P49721, P49720, P28066, Q16401	5.65328	5.64302e-08
REACTOME_PATHWAY	R-HSA-69017:R-HSA-69017	19	2.19653	2.04875e-09	P25788, Q9UL46, P25789, P25786, Q06323, Q99436, P62987, A0A024RA52, P20618, P28072, P28062, P28070, O14818, P60900, P28065, P49721, P49720, P28066, Q16401	5.54243	7.01452e-08
REACTOME_PATHWAY	R-HSA-69481:R-HSA-69481	19	2.19653	2.04875e-09	P25788, Q9UL46, P25789, P25786, Q06323, Q99436, P62987, A0A024RA52, P20618, P28072, P28062, P28070, O14818, P60900, P28065, P49721, P49720, P28066, Q16401	5.54243	7.01452e-08
REACTOME_PATHWAY	R-HSA-69229:R-HSA-69229	19	2.19653	2.04875e-09	P25788, Q9UL46, P25789, P25786, Q06323, Q99436, P62987, A0A024RA52, P20618, P28072, P28062, P28070, O14818, P60900, P28065, P49721, P49720, P28066, Q16401	5.54243	7.01452e-08
REACTOME_PATHWAY	R-HSA-349425:R-HSA-349425	19	2.19653	2.94031e-09	P25788, Q9UL46, P25789, P25786, Q06323, Q99436, P62987, A0A024RA52, P20618, P28072, P28062, P28070, O14818, P60900, P28065, P49721, P49720, P28066, Q16401	5.43584	9.60947e-08
REACTOME_PATHWAY	R-HSA-69601:R-HSA-69601	19	2.19653	4.17815e-09	P25788, Q9UL46, P25789, P25786, Q06323, Q99436, P62987, A0A024RA52, P20618, P28072, P28062, P28070, O14818, P60900, P28065, P49721, P49720, P28066, Q16401	5.33328	1.30613e-07
REACTOME_PATHWAY	R-HSA-180585:R-HSA-180585	19	2.19653	5.88116e-09	P25788, Q9UL46, P25789, P25786, Q06323, Q99436, P62987, A0A024RA52, P20618, P28072, P28062, P28070, O14818, P60900, P28065, P49721, P49720, P28066, Q16401	5.23452	1.56613e-07
GOTERM_BP_DIRECT	GO:0051436~negative regulation of ubiquitin-protein ligase activity involved in mitotic cell cycle	19	2.19653	8.13419e-09	P25788, Q9UL46, P25789, P25786, Q06323, Q99436, P62987, A0A024RA52, P20618, P28072, P28062, P28070, O14818, P60900, P28065, P49721, P49720, P28066, Q16401	5.3432	1.13201e-06
REACTOME_PATHWAY	R-HSA-4641257:R-HSA-4641257	19	2.19653	8.20379e-09	P25788, Q9UL46, P25789, P25786, Q06323, Q99436, P62987, A0A024RA52, P20618, P28072, P28062, P28070, O14818, P60900, P28065, P49721, P49720, P28066, Q16401	5.13934	1.96618e-07
REACTOME_PATHWAY	R-HSA-4641258:R-HSA-4641258	19	2.19653	1.55604e-08	P25788, Q9UL46, P25789, P25786, Q06323, Q99436, P62987, A0A024RA52, P20618, P28072, P28062, P28070, O14818, P60900, P28065, P49721, P49720, P28066, Q16401	4.95902	3.49624e-07
REACTOME_PATHWAY	R-HSA-68827:R-HSA-68827	19	2.19653	2.85934e-08	P25788, Q9UL46, P25789, P25786, Q06323, Q99436, P62987, A0A024RA52, P20618, P28072, P28062, P28070, O14818, P60900, P28065, P49721, P49720, P28066, Q16401	4.79091	6.04666e-07
GOTERM_BP_DIRECT	GO:0031145~anaphase-promoting complex-dependent catabolic process	19	2.19653	4.93727e-08	P25788, Q9UL46, P25789, P25786, Q06323, Q99436, P62987, A0A024RA52, P20618, P28072, P28062, P28070, O14818, P60900, P28065, P49721, P49720, P28066, Q16401	4.80212	5.88943e-06
REACTOME_PATHWAY	R-HSA-174084:R-HSA-174084	19	2.19653	8.86662e-08	P25788, Q9UL46, P25789, P25786, Q06323, Q99436, P62987, A0A024RA52, P20618, P28072, P28062, P28070, O14818, P60900, P28065, P49721, P49720, P28066, Q16401	4.48673	1.723e-06
REACTOME_PATHWAY	R-HSA-4608870:R-HSA-4608870	19	2.19653	1.15773e-07	P25788, Q9UL46, P25789, P25786, Q06323, Q99436, P62987, A0A024RA52, P20618, P28072, P28062, P28070, O14818, P60900, P28065, P49721, P49720, P28066, Q16401	4.41662	2.19054e-06
REACTOME_PATHWAY	R-HSA-5632684:R-HSA-5632684	19	2.19653	1.93904e-07	P25788, Q9UL46, P25789, P25786, Q06323, Q99436, P62987, A0A024RA52, P20618, P28072, P28062, P28070, O14818, P60900, P28065, P49721, P49720, P28066, Q16401	4.28279	3.48542e-06
GOTERM_BP_DIRECT	GO:0048013~ephrin receptor signaling pathway	19	2.19653	1.96626e-07	P29317, O15144, O15145, G5EA09, P60709, O15511, O14672, O00560, P63010, P19105, P61160, P61586, P08253, P59998, O95782, P61158, P46108, Q96CW1, P34741, P54756	4.41125	2.11846e-05
REACTOME_PATHWAY	R-HSA-174154:R-HSA-174154	19	2.19653	2.4883e-07	P25788, Q9UL46, P25789, P25786, Q06323, Q99436, P62987, A0A024RA52, P20618, P28072, P28062, P28070, O14818, P60900, P28065, P49721, P49720, P28066, Q16401	4.21886	4.25973e-06
REACTOME_PATHWAY	R-HSA-5658442:R-HSA-5658442	19	2.19653	3.17603e-07	P25788, Q9UL46, P25789, P25786, Q06323, Q99436, P62987, A0A024RA52, P20618, P28072, P28062, P28070, O14818, P60900, P28065, P49721, P49720, P28066, Q16401	4.15682	5.3106e-06
REACTOME_PATHWAY	R-HSA-68949:R-HSA-68949	19	2.19653	6.40608e-07	P25788, Q9UL46, P25789, P25786, Q06323, Q99436, P62987, A0A024RA52, P20618, P28072, P28062, P28070, O14818, P60900, P28065, P49721, P49720, P28066, Q16401	3.98118	1.04681e-05
REACTOME_PATHWAY	R-HSA-174178:R-HSA-174178	19	2.19653	8.0166e-07	P25788, Q9UL46, P25789, P25786, Q06323, Q99436, P62987, A0A024RA52, P20618, P28072, P28062, P28070, O14818, P60900, P28065, P49721, P49720, P28066, Q16401	3.92589	1.28087e-05
REACTOME_PATHWAY	R-HSA-174184:R-HSA-174184	19	2.19653	8.0166e-07	P25788, Q9UL46, P25789, P25786, Q06323, Q99436, P62987, A0A024RA52, P20618, P28072, P28062, P28070, O14818, P60900, P28065, P49721, P49720, P28066, Q16401	3.92589	1.28087e-05
GOTERM_MF_DIRECT	GO:0051087~chaperone binding	19	2.19653	7.39711e-08	O75347, Q16543, P02768, P00441, P27797, P30040, P61604, P04156, P30479, Q07812, P10809, P50502, Q9NZJ4, P10909, P11021, O95433, Q9NQP4, Q9Y4L1, P53634, P30475	4.68608	3.47311e-06
GOTERM_MF_DIRECT	GO:0016787~hydrolase activity	19	2.19653	0.00739084	Q9NX46, Q8N0Y7, P62140, P20933, P18669, P21589, P07858, P13686, P46926, Q9NZN4, Q8NHP8, P30041, Q13510, Q96KP4, Q96DG6, P15259, P53634, P55072, Q9UKK9	1.98729	0.0953414
GOTERM_BP_DIRECT	GO:0008360~regulation of cell shape	19	2.19653	0.000216797	P02751, P04083, P05362, P26038, P52565, P04075, O15031, P07686, P35579, P19105, P35580, P09493, H7BYY1, P15311, P35241, Q7Z406, Q9NVD7, P21246, Q99584, Q6ZN40, Q96AC1	2.70977	0.00879257
GOTERM_BP_DIRECT	GO:0007411~axon guidance	19	2.19653	0.00101682	Q01082, Q16394, P13591, P35052, P55268, O14786, O43505, Q16555, Q13813, P24043, O00339, P35580, P15311, Q92859, O60462, A0A1C7CYX9, Q13214, Q14563, Q9BUD6, P54756	2.38596	0.0324513
GOTERM_BP_DIRECT	GO:0001666~response to hypoxia	19	2.19653	0.00247163	Q02809, P17655, P08294, P17813, P00338, P19021, P23526, P00750, P14625, P10809, P04179, P08253, P14618, Q15063, O43707, P07996, P50281, Q9Y4K0, P01034	2.20562	0.0682074
GOTERM_BP_DIRECT	GO:0007596~blood coagulation	19	2.19653	0.00507574	P10646, Q9GZP0, P02452, Q03405, Q9NZN4, P08123, Q9NRA1, P52907, P00742, P05154, P00750, P47755, P47756, Q9UNN8, P01008, P02042, P07093, P08758, I3L3H7, P07225	2.06178	0.119123
KEGG_PATHWAY	hsa04514:Cell adhesion molecules (CAMs)	19	2.19653	0.0136329	Q92692, Q7Z3B1, P05556, K7EKE8, P30504, P19022, P05362, P13591, P18462, Q9BQ51, P16190, O75144, P30479, P06756, Q92859, P15151, P30455, P31431, Q13740, P23229, P16188, P13611, P34741, P30475	1.84455	0.0955251
GOTERM_CC_DIRECT	GO:0043005~neuron projection	19	2.19653	0.032459	P46940, E7EVA0, O15144, P27816, P19021, O15511, P06744, P23526, P07737, P07900, P26447, P55290, P16949, Q96HC4, P08670, P31150, P09429, O43707, Q99497, P78330	1.69489	0.185611
GOTERM_BP_DIRECT	GO:0006936~muscle contraction	18	2.08092	2.18807e-05	K7ENT6, Q08043, P18206, Q9Y490, P60660, P07951, P62942, C9J813, D6R904, P0DP23, P19105, P09493, Q15746, H7BYY1, Q05682, P06753, P24844, P67936, P68133, Q5TCU3, P17661, Q6ZN40, P35749, P14649	3.35889	0.00132789
GOTERM_BP_DIRECT	GO:0006521~regulation of cellular amino acid metabolic process	18	2.08092	1.94455e-10	P25788, Q9UL46, P25789, P25786, Q06323, Q99436, A0A024RA52, P20618, P28072, P28062, P28070, O14818, P60900, P28065, P49721, P49720, P28066, Q16401	7.04707	3.41832e-08
GOTERM_CC_DIRECT	GO:0001725~stress fiber	18	2.08092	2.25813e-10	Q99439, K7ENT6, O75369, P35579, D6R904, P12814, P19105, P35580, P09493, Q15746, H7BYY1, P06753, P24844, Q16658, Q7Z406, P67936, P68133, Q9NR12, O43707, P13796, Q6ZN40, Q96AC1	7.04718	5.35004e-09
REACTOME_PATHWAY	R-HSA-350562:R-HSA-350562	18	2.08092	1.5639e-08	P25788, Q9UL46, P25789, P25786, Q06323, Q99436, A0A024RA52, P20618, P28072, P28062, P28070, O14818, P60900, P28065, P49721, P49720, P28066, Q16401	5.25072	3.40741e-07
GOTERM_CC_DIRECT	GO:0005581~collagen trimer	18	2.08092	1.24493e-06	P05997, P12110, P01033, P12111, P20908, A0A087WXW9, P02452, Q15113, Q9Y6C2, Q96CG8, Q99715, P50454, P02461, P08123, H0Y789, P12109, P02458, A0A0A0MT20, Q03692, Q05707, I3L3H7, P03956	4.13639	2.07262e-05
GOTERM_CC_DIRECT	GO:0005796~Golgi lumen	18	2.08092	2.30502e-06	P08294, O00468, P35052, Q6UVK1, P51888, Q9BRK5, P07585, P24347, P00742, P51884, P21810, P31431, P04004, P50281, P98160, P13611, P34741, P07225	3.96404	3.73649e-05
GOTERM_MF_DIRECT	GO:0001948~glycoprotein binding	18	2.08092	1.26018e-08	P10619, P27824, Q12907, P01130, P02786, G5EA09, P27797, P11717, P21333, O00560, P14735, P61769, P07900, P00750, P08238, P08670, P09382, P11021, P07996	5.53223	8.28357e-07
GOTERM_MF_DIRECT	GO:0002020~protease binding	18	2.08092	9.92222e-06	P07355, P04080, P02751, P01033, P05556, P01130, Q9ULZ3, P35237, Q16610, Q07954, H0Y789, P16035, P05154, P06756, P05121, P01008, P01037, P01023, P01034	3.56035	0.0003373
GOTERM_MF_DIRECT	GO:0016887~ATPase activity	18	2.08092	0.0103877	Q9UPN3, Q14240, Q9NTK5, P35579, P14735, P0DMV9, P06576, P11142, P07900, Q9P2D7, P10809, Q15257, O00148, P68032, P10909, P30049, P11021, P55072	1.965	0.123658
GOTERM_MF_DIRECT	GO:0003824~catalytic activity	18	2.08092	0.0133337	P37837, Q96CN7, Q13011, P49327, P15289, P54687, P14735, P29401, O94760, O95865, Q13510, P00491, P08195, P10253, Q8IWU6, O75787, P07954, Q13126	1.91274	0.154255
GOTERM_MF_DIRECT	GO:0004872~receptor activity	18	2.08092	0.0450472	P01130, P05556, P05362, P11717, Q03405, Q00688, Q07954, Q92859, Q9P2E9, O60462, Q9H6X2, Q9UNN8, Q8NFZ8, P15151, O75787, O75882, P04264, P15144	1.65712	0.359541
GOTERM_BP_DIRECT	GO:0050821~protein stabilization	18	2.08092	0.000448719	Q16543, P04406, P13473, P27797, P21333, P11279, P0DMV9, P07737, P07900, P08238, P23284, P10809, P48643, P10909, P50990, P50991, P13284, Q99497	2.64265	0.0163382
GOTERM_BP_DIRECT	GO:0006094~gluconeogenesis	17	1.96532	1.48847e-10	P40925, Q8N0Y7, P04406, P60174, P40926, P18669, P17174, P04075, P06733, P06744, P00505, P09972, P36871, P13929, P00558, P09104, P15259	7.71441	2.76195e-08
GOTERM_BP_DIRECT	GO:0006958~complement activation, classical pathway	17	1.96532	3.05202e-05	P01861, P01876, Q9NZP8, Q07021, P09871, P0DOY2, P01834, P05155, P01857, P05156, P01859, P10909, P08174, P01024, P0C0L5, P00736, P06681	3.42863	0.00175603
GOTERM_BP_DIRECT	GO:0030199~collagen fibril organization	17	1.96532	1.70541e-11	P07355, P05997, P20908, A0A087WXW9, P02452, Q99715, P50454, P02461, P08123, O60568, P22105, P24347, P51884, P02458, Q16473, Q16832, Q05707, I3L3H7, Q9Y4K0	8.70344	3.79739e-09
REACTOME_PATHWAY	R-HSA-186797:R-HSA-186797	17	1.96532	3.05695e-11	P35442, P49746, P05997, P12110, P20908, P12111, Q9GZP0, P08572, A0A087WXW9, P16234, P02461, Q9NRA1, P02462, P00750, P12109, P02458, P09619, P07996	7.90343	3.13993e-09
REACTOME_PATHWAY	R-HSA-445355:R-HSA-445355	17	1.96532	1.70697e-10	P07355, K7ENT6, P04083, P18206, Q9Y490, P60660, P07951, C9J813, D6R904, P08133, P0DP23, P19105, P09493, Q15746, H7BYY1, Q05682, P06753, P24844, P67936, Q5TCU3, Q6ZN40, P35749, P14649	7.226	1.36368e-08
GOTERM_CC_DIRECT	GO:0005903~brush border	17	1.96532	1.13623e-08	Q08043, P18206, P60660, O75369, P35579, P12814, P19105, P35580, Q15149, Q14651, O00299, P15311, P47755, Q7Z406, P47756, O43707, P61158	5.9901	2.33306e-07
KEGG_PATHWAY	hsa03050:Proteasome	17	1.96532	2.79771e-08	P25788, Q9UL46, P25789, P25786, Q06323, Q99436, A0A024RA52, P20618, P28072, P28062, P28070, O14818, P60900, P28065, P49721, P49720, P28066	5.32624	8.95266e-07
GOTERM_CC_DIRECT	GO:0005884~actin filament	17	1.96532	3.94192e-08	P46940, K7ENT6, Q08043, P07951, P21333, P35609, D6R904, P12814, Q14651, P09493, H7BYY1, P15311, P06753, P47756, P68032, P67936, P68133, Q5TCU3, P13797, P13796, Q6ZN40, Q14247	5.52932	7.83298e-07
GOTERM_BP_DIRECT	GO:0046718~viral entry into host cell	17	1.96532	1.77102e-06	Q92692, P01130, P30530, P05556, P02786, K7EKE8, P60033, P05362, P07858, P13591, P11279, P14735, P0DMV9, P06756, H0YDL9, P15151, P08174, P15144, Q14118	4.24293	0.000159858
GOTERM_BP_DIRECT	GO:0001503~ossification	17	1.96532	1.77102e-06	P05997, P02788, Q92882, Q16394, P02765, P29279, P55287, Q93063, Q9GZX9, Q16610, P13497, P05452, Q9UNW1, P52823, P09486, Q16832, Q9NR12	4.24293	0.000159858
GOTERM_MF_DIRECT	GO:0005516~calmodulin binding	17	1.96532	0.0278295	P46940, Q99439, Q01082, Q5T4S7, P49006, C9J813, P35579, Q13813, P35580, Q15417, Q15746, Q8IUX7, Q05682, Q7Z406, P29966, Q15075, O95613, P35749	1.79692	0.265973
GOTERM_CC_DIRECT	GO:0030426~growth cone	17	1.96532	0.000111024	P46940, P80723, O15145, Q12852, P43034, Q16643, P04216, O14786, Q16555, P0DP23, P35580, P16035, Q16658, Q7Z406, A0A1C7CYX9, O43390, Q6IBS0, Q14247	3.09833	0.00145415
GOTERM_BP_DIRECT	GO:0043524~negative regulation of neuron apoptotic process	17	1.96532	0.000915475	Q01105, P30530, P49588, P00441, P06744, Q99538, O14786, P48681, Q07954, P50897, P02649, P08238, Q07812, P10809, P04179, P48506, Q99497	2.57147	0.0295458
REACTOME_PATHWAY	R-HSA-2029482:R-HSA-2029482	17	1.96532	0.00532286	P01861, O15144, O15145, P60709, O15511, P23528, P35579, P0DOY2, P01834, P07900, P61160, P08238, P01857, P01859, P59998, P61158, P46108	2.1433	0.0426693
GOTERM_BP_DIRECT	GO:0043123~positive regulation of I-kappaB kinase/NF-kappaB signaling	17	1.96532	0.00687112	Q9P0L0, P02788, Q8WVQ1, P62942, P29692, P21333, P61088, Q8WVN6, P62987, Q16610, P21980, P26447, P61586, P09382, Q8N114, Q99584, P63279	2.10829	0.14779
GOTERM_BP_DIRECT	GO:0050776~regulation of immune response	17	1.96532	0.0169538	Q92692, P05556, K7EKE8, P60033, P30504, P05362, P02452, P62942, P18462, P02461, P08123, P0DOY2, P61769, P01834, P16190, P30479, P02458, H0YDL9, P15151, P30455, I3L3H7, P01024, P16188, P30475	1.90693	0.28534
GOTERM_CC_DIRECT	GO:0030175~filopodium	16	1.84971	8.85611e-07	P15291, P05556, P26038, Q12792, Q9Y4F1, Q14517, P35609, P15311, P35241, Q16658, P68032, Q6IBS0, P68133, P23229, P13796, Q14118	4.76429	1.60451e-05
GOTERM_BP_DIRECT	GO:0006096~glycolytic process	16	1.84971	2.06721e-11	P07205, Q8N0Y7, P04406, P60174, P18669, P00338, P04075, P06733, P06744, P19367, P09972, P36871, P13929, P00558, P09104, P15259	9.3961	4.31528e-09
REACTOME_PATHWAY	R-HSA-70263:R-HSA-70263	16	1.84971	4.13046e-10	P07205, P40925, P04406, P60174, P40926, P18669, P17174, P04075, P06733, P06744, P00505, P09972, P00558, P13929, P09104, P15259	7.43852	2.12128e-08
GOTERM_MF_DIRECT	GO:0044325~ion channel binding	16	1.84971	0.000500589	Q08043, Q13642, P62942, P21333, P35609, P12814, P0DP23, P27348, P07900, P04156, P14314, P08238, P62258, Q04917, O43707, Q96CW1	2.82867	0.00927192
GOTERM_MF_DIRECT	GO:0008083~growth factor activity	16	1.84971	0.0158857	P08476, P28799, P01033, Q9GZP0, P29279, Q99988, P48745, P06744, Q9Y240, P60983, Q9NRA1, H0Y789, P09603, P55145, P13497, P51858, P21246	1.97309	0.173231
GOTERM_BP_DIRECT	GO:0030336~negative regulation of cell migration	16	1.84971	7.07404e-05	Q99439, Q15262, P18206, P17813, P52565, Q5TG12, P08779, P04216, P09493, H7BYY1, Q9Y696, Q8IWU6, P05121, P52823, P21246, P24593, Q5JRA6, Q14118, Q6ZN40	3.36281	0.00352038
GOTERM_CC_DIRECT	GO:0030018~Z disc	16	1.84971	0.000444435	Q08043, Q9Y281, P62942, P21333, O75369, P35609, Q14315, P12814, P19105, P24844, P47756, Q9NVD7, O76003, P17661, O43707, P04792	2.86665	0.00471013
GOTERM_CC_DIRECT	GO:0005938~cell cortex	16	1.84971	0.000692582	P07355, Q96RW7, P29279, P43034, Q16643, O75369, P07737, P35580, P61586, P29966, Q03692, Q02952, O76003, P19338, Q96AC1, Q14247	2.75012	0.00720743
GOTERM_BP_DIRECT	GO:0050900~leukocyte migration	16	1.84971	0.00112931	P02751, P15291, P05556, P05362, P26038, P02452, P35579, P08123, P62937, P06756, P08195, Q9UNN8, P23229, P16070, I3L3H7, P07225, P03956	2.61858	0.0353049
KEGG_PATHWAY	hsa04974:Protein digestion and absorption	16	1.84971	0.00145873	P05997, P12110, P20908, P12111, P08572, A0A087WXW9, P02452, Q99715, P02461, P42785, P08123, P02462, P12109, P08195, P02458, Q03692, Q05707, I3L3H7	2.50647	0.0154506
KEGG_PATHWAY	hsa05145:Toxoplasmosis	16	1.84971	0.0124633	P42224, P01130, P05556, P54652, P25391, P55268, Q16363, P24043, P99999, P0DMV9, P11142, O15230, P07942, P11047, P23229, P17066	2.00517	0.0901098
KEGG_PATHWAY	hsa04670:Leukocyte transendothelial migration	16	1.84971	0.0182424	Q08043, P18206, P05556, P05362, P26038, P60709, P04216, P35609, P12814, P19105, P15311, P24844, P08253, P61586, O43707, P61224	1.91799	0.119604
GOTERM_BP_DIRECT	GO:0098869~cellular oxidant detoxification	15	1.7341	7.79029e-06	O43396, P69905, Q9BRA2, P02768, P00390, P78417, Q92626, P30041, P30044, P30711, P02649, P09211, P10599, Q16881, Q99497	4.27858	0.000530872
GOTERM_CC_DIRECT	GO:0005839~proteasome core complex	15	1.7341	2.12287e-14	P25788, P25789, P25786, Q99436, A0A024RA52, P20618, P28072, P28062, P28070, O14818, P60900, P28065, P49721, P49720, P28066	15.1011	6.8745e-13
REACTOME_PATHWAY	R-HSA-3000170:R-HSA-3000170	15	1.7341	2.88015e-10	P02751, P05997, P05556, P20908, A0A087WXW9, P02452, P02461, P08123, P12814, P24821, P06756, P31431, P04004, P23229, P07996, I3L3H7, P34741	8.26503	1.72569e-08
REACTOME_PATHWAY	R-HSA-5625740:R-HSA-5625740	15	1.7341	5.40819e-10	P62140, P60660, P31946, P61981, P35579, P19105, P35580, P27348, P24844, P62258, Q7Z406, P61586, Q04917, P35749, P63104	7.96985	2.59233e-08
REACTOME_PATHWAY	R-HSA-3000157:R-HSA-3000157	15	1.7341	1.72819e-09	P14543, Q14112, P05556, P08572, P55268, Q16363, P25391, P24043, P02462, P06756, O15230, P07942, P11047, P23229, P98160	7.43852	6.21285e-08
REACTOME_PATHWAY	R-HSA-70171:R-HSA-70171	15	1.7341	4.93901e-09	P07205, P04406, P60174, P18669, P04075, P06733, P30153, P06744, P19367, P09972, P00558, P13929, P09104, P15259, P14618	6.97362	1.42046e-07
GOTERM_MF_DIRECT	GO:0004298~threonine-type endopeptidase activity	15	1.7341	4.60425e-14	P25788, P25789, P25786, Q99436, A0A024RA52, P20618, P28072, P28062, P28070, O14818, P60900, P28065, P49721, P49720, P28066	14.2697	6.48992e-12
GOTERM_MF_DIRECT	GO:0001618~virus receptor activity	15	1.7341	7.74552e-06	P01130, P30530, P05556, Q92692, P02786, K7EKE8, P05362, P13591, P11279, P14735, P0DMV9, P06756, P15151, P08174, P15144, Q14118	4.2809	0.000272717
GOTERM_BP_DIRECT	GO:0042060~wound healing	15	1.7341	3.82049e-05	Q99439, P02751, Q9UPN3, P01033, P17813, P16234, P02461, H0Y789, P07585, P09493, P24821, H7BYY1, Q13308, P09619, P09486, P31431, Q5JRA6, Q6ZN40	3.74376	0.00208973
GOTERM_CC_DIRECT	GO:0001726~ruffle	15	1.7341	7.9142e-05	P07355, P46940, Q9Y490, P05556, P06703, Q9Y4G6, P35579, P12814, P15311, P35241, Q16658, P31949, Q9NR12, P13796, Q14247	3.52359	0.00108282
GOTERM_BP_DIRECT	GO:0006956~complement activation	15	1.7341	9.90511e-05	P01861, P08603, P09871, P0DOY2, P48740, P01834, P00751, P01857, P01859, P10909, P01024, P00746, P0C0L5, P00736, P06681	3.44254	0.00464898
GOTERM_BP_DIRECT	GO:0032355~response to estradiol	15	1.7341	0.000162564	P10646, P04083, P27797, P29279, P02452, P19021, P06744, P13639, P09211, P09619, P21246, Q15063, P55957, I3L3H7, P12004, P01034	3.29122	0.00702722
GOTERM_CC_DIRECT	GO:0005623~cell	15	1.7341	0.000250061	P30101, O43396, Q9H299, P18206, Q8NBS9, H0Y3Z3, P19367, P30041, P13667, P02649, O00391, P07237, Q16881, P32119, Q06830, P21399	3.17123	0.00290251
GOTERM_BP_DIRECT	GO:0038096~Fc-gamma receptor signaling pathway involved in phagocytosis	15	1.7341	0.00450143	P01861, O15144, O15145, P60709, O15511, P0DOY2, P01834, P07900, P61160, P08238, P01857, P01859, P59998, P61158, P46108	2.35827	0.107882
GOTERM_BP_DIRECT	GO:0006986~response to unfolded protein	14	1.6185	7.40198e-08	P34932, P54652, P50454, P61604, P55145, P11142, P07900, P08238, P10809, P07996, P04792, P17066, Q9BS26, Q92598	6.65557	8.525e-06
GOTERM_BP_DIRECT	GO:0000302~response to reactive oxygen species	14	1.6185	2.7093e-08	P08294, P00441, P00390, H0Y3Z3, P30041, P99999, P30044, P02649, P09211, P10599, P04179, Q16881, P07237, P32119, Q06830	7.16754	3.4804e-06
GOTERM_CC_DIRECT	GO:0005793~endoplasmic reticulum-Golgi intermediate compartment	14	1.6185	1.49851e-05	Q02818, P02751, Q12907, P80303, H0Y3Z3, P50454, Q15084, O75396, Q969H8, P07237, P11021, P09429, P15144, P33908, Q9BS26	4.35267	0.000214649
BIOCARTA	h_rhoPathway:Rho cell motility signaling pathway	14	1.6185	2.34435e-05	P18206, Q9Y490, O15144, O15145, O15511, Q07960, P23528, P07737, P61160, Q15746, P06396, P61586, P59998, P61158	3.75909	0.00222468
GOTERM_MF_DIRECT	GO:0008237~metallopeptidase activity	14	1.6185	0.00017795	Q9NY33, P52888, Q9UHI8, O14672, Q6P179, Q9H4A4, P13497, Q96KP4, P55786, P08254, P09960, P08253, P15144, Q13219	3.4529	0.00427071
KEGG_PATHWAY	hsa05130:Pathogenic Escherichia coli infection	14	1.6185	4.74697e-05	P07437, O15144, P05556, O15145, P60709, P68363, O15511, P15311, P61586, Q9BQE3, Q13885, P59998, P19338, Q14247	3.78427	0.000759245
GOTERM_CC_DIRECT	GO:0032587~ruffle membrane	14	1.6185	0.000115785	P68104, Q9UPN3, P29317, Q9Y490, P05556, P23528, Q12792, P15531, P07900, P18085, P09493, P15311, H7BYY1, P06756, P13796, Q6ZN40	3.60953	0.00148488
GOTERM_CC_DIRECT	GO:0042383~sarcolemma	14	1.6185	0.000168308	P07355, P12110, P04083, P05556, P12111, P11279, P24043, Q14315, Q15149, P12109, Q09666, P21810, P17661, Q14118	3.48213	0.00207158
GOTERM_BP_DIRECT	GO:0007160~cell-matrix adhesion	14	1.6185	0.000517632	P49746, P18206, P14543, Q14112, P05556, P29279, Q9UBX5, P02461, P06756, P04004, P23229, P16070, P08962, Q96AC1	3.10593	0.018229
GOTERM_BP_DIRECT	GO:0019886~antigen processing and presentation of exogenous peptide antigen via MHC class II	14	1.6185	0.000641602	P27824, Q96FJ2, P07711, Q99538, P63010, Q15436, Q14203, P07339, Q00610, Q10567, O95782, P13284, P25774, Q96CW1	3.03841	0.0212083
GOTERM_BP_DIRECT	GO:0006464~cellular protein modification process	14	1.6185	0.00221287	Q02809, P68036, P16870, P49903, P22314, O14933, P61088, O00462, P62987, A0A0A6YYG9, P00750, O00754, P63279, Q9Y4K0	2.66223	0.0628436
REACTOME_PATHWAY	R-HSA-5628897:R-HSA-5628897	14	1.6185	0.00412928	P00390, P06744, P31946, P61981, P99999, P27348, P30044, P62258, P10599, Q16881, Q04917, P32119, Q06830, P63104	2.45034	0.0343957
KEGG_PATHWAY	hsa05222:Small cell lung cancer	14	1.6185	0.00765776	P02751, P05556, P08572, P55268, Q16363, P25391, P24043, P02462, P99999, P06756, O15230, P07942, P11047, P23229	2.27056	0.0615086
KEGG_PATHWAY	hsa04530:Tight junction	14	1.6185	0.00929569	Q08043, P60709, P30153, P35609, P35579, P12814, P19105, P35580, P24844, Q7Z406, P61586, O43707, P35749, Q14247	2.21837	0.0719905
REACTOME_PATHWAY	R-HSA-6807878:R-HSA-6807878	14	1.6185	0.013562	Q01082, P61204, Q96FJ2, P68363, Q13813, P53621, P18085, Q9Y678, Q14203, Q9BQE3, P48444, Q13885, P08174, O14579	2.12529	0.0962607
GOTERM_BP_DIRECT	GO:0000086~G2/M transition of mitotic cell cycle	14	1.6185	0.0198503	P07437, P62140, P30153, P43034, P61981, P62987, P0DP23, P48681, P07900, P62258, P63208, Q14203, Q15691, O95613	2.04039	0.319459
GOTERM_BP_DIRECT	GO:0061621~canonical glycolysis	13	1.50289	1.14662e-09	P04406, P60174, P18669, P04075, P06733, P06744, P19367, P09972, P00558, P13929, P14618, P15259, P09104	9.98335	1.74078e-07
REACTOME_PATHWAY	R-HSA-3299685:R-HSA-3299685	13	1.50289	1.04404e-06	P08294, P00441, P00390, H0Y3Z3, P30041, P99999, P30044, P09211, P10599, P04179, Q16881, P07237, P32119, Q06830	5.68828	1.63187e-05
GOTERM_MF_DIRECT	GO:0004866~endopeptidase inhibitor activity	13	1.50289	3.44648e-07	P04080, P10646, Q14624, P02765, Q6YHK3, P19823, P20810, P20742, P01024, P01023, P0C0L5, P01034, P07225	6.49269	1.54464e-05
GOTERM_MF_DIRECT	GO:0008092~cytoskeletal protein binding	13	1.50289	2.9696e-06	P07355, P17655, Q96FJ2, P15291, P04075, A6NMY6, Q9Y4F1, P35609, P09972, Q14315, P09493, H7BYY1, P35908, P17661, Q6ZN40	5.41058	0.000121994
GOTERM_BP_DIRECT	GO:0030855~epithelial cell differentiation	13	1.50289	0.000165668	O14773, P07858, P17931, P37802, Q01995, P16152, P31942, P02462, P09972, Q15417, P00558, P02533, P12004	3.7081	0.00706946
GOTERM_MF_DIRECT	GO:0042277~peptide binding	13	1.50289	2.87461e-05	P62937, Q9H4A4, O14773, P23284, P55786, P09960, P05388, P27797, P52888, Q9NZ08, Q6P179, P15144, P14735	4.40183	0.000833301
GOTERM_BP_DIRECT	GO:0030334~regulation of cell migration	13	1.50289	0.000284507	P18206, P21333, O15031, Q16363, P04216, P25391, P09238, P24043, P02545, O15230, P61586, Q9NQC3, P07093	3.50766	0.0107418
GOTERM_BP_DIRECT	GO:0001558~regulation of cell growth	13	1.50289	0.000593725	Q16270, P22692, P02786, Q9UBX5, P29279, Q08629, P24592, P48745, O00622, P24593, Q92743, P17936, O94985	3.24459	0.0200377
GOTERM_CC_DIRECT	GO:0031225~anchored component of membrane	13	1.50289	0.00711789	P10646, Q7Z3B1, P21589, O75326, P13591, P35052, Q03405, Q6YHK3, Q93070, P04156, P55290, P08174, Q10588	2.43221	0.0569827
GOTERM_CC_DIRECT	GO:0005882~intermediate filament	13	1.50289	0.00711789	P35527, P08779, P15531, P41219, P48681, P02545, P13645, P13647, P08670, P02533, P13646, P35908, P17661	2.43221	0.0569827
GOTERM_BP_DIRECT	GO:0006979~response to oxidative stress	13	1.50289	0.00888701	O76061, Q92626, P05067, P48637, P04156, P30044, P02649, O75874, O75882, P04264, P50281, P48506, P32119	2.3597	0.177059
KEGG_PATHWAY	hsa05100:Bacterial invasion of epithelial cells	13	1.50289	0.00974073	P02751, P18206, O15144, P05556, O15145, P61586, P60709, Q00610, P59998, O15511, P53675, P46108, Q14247	2.2976	0.0731234
GOTERM_CC_DIRECT	GO:0005770~late endosome	13	1.50289	0.0127568	Q9BRK5, Q96QK1, P02787, P11142, P13473, P01130, Q9BWS9, P11717, P53675, P11279, P08962, Q99538, Q8NBP7	2.25279	0.0888469
GOTERM_BP_DIRECT	GO:0030036~actin cytoskeleton organization	13	1.50289	0.0297137	Q01518, Q9ULV4, G5EA09, P43034, O15511, O00560, P23528, O75369, P22105, P07737, Q16658, P47756, P61586, Q9NR12	1.99667	0.423359
REACTOME_PATHWAY	R-HSA-977225:R-HSA-977225	13	1.50289	0.0305163	P62987, P61769, P02788, P06396, O14933, Q9Y287, P05067, Q16778, Q08431, Q15582, P98160, P01034, P62805	1.97349	0.189592
GOTERM_BP_DIRECT	GO:0070527~platelet aggregation	12	1.38728	3.6502e-06	P12814, P19105, O00299, P18206, Q9Y490, P24844, P16234, P60709, P21333, P04792, P35579, P21291	5.84391	0.000283487
GOTERM_BP_DIRECT	GO:0006749~glutathione metabolic process	12	1.38728	8.65703e-05	P26641, O00299, P30711, Q9Y696, P09211, O75874, P00441, O95833, P00390, P04179, P78417, Q04760	4.27858	0.0041223
GOTERM_BP_DIRECT	GO:0006027~glycosaminoglycan catabolic process	12	1.38728	1.78036e-08	P16278, P15586, P54802, P35475, O00468, P31431, P35052, P22304, P04066, P98160, P51688, P34741	9.2154	2.37855e-06
REACTOME_PATHWAY	R-HSA-5627123:R-HSA-5627123	12	1.38728	1.26917e-07	P0DP23, P19105, P35580, Q15746, P62140, Q7Z406, P24844, P60660, P21333, P35579, P35749, Q14247	7.43852	2.33982e-06
GOTERM_BP_DIRECT	GO:0061077~chaperone-mediated protein folding	12	1.38728	1.18706e-06	P13667, P27824, P23284, Q02790, P27797, O95302, P62942, P10909, Q96AY3, P26885, Q9Y680, Q00688	6.47569	0.000116605
GOTERM_BP_DIRECT	GO:0030049~muscle filament sliding	12	1.38728	1.59562e-06	K7ENT6, Q08043, P07951, P60660, P35609, D6R904, P09493, H7BYY1, P06753, P08670, P68032, P68133, P67936, Q5TCU3, P17661, P14649, Q6ZN40	6.30528	0.000148028
GOTERM_BP_DIRECT	GO:0000413~protein peptidyl-prolyl isomerization	12	1.38728	6.06263e-06	Q9Y536, P62937, P45877, P23284, Q15257, Q02790, O95302, P62942, Q96AY3, P26885, Q9Y680, Q00688	5.5721	0.000440104
GOTERM_BP_DIRECT	GO:0071230~cellular response to amino acid stimulus	12	1.38728	1.52821e-05	P17655, P05997, P12109, Q9GZP0, P08253, P02452, Q14103, I3L3H7, P02461, P08123, O00410, P02462, Q9NRA1	5.09788	0.000962604
GOTERM_BP_DIRECT	GO:0021762~substantia nigra development	12	1.38728	2.33271e-05	P0DP23, P00367, P09936, P27348, P80723, P13929, P62258, P61586, P00338, P60709, Q04917, P11021	4.88981	0.00139035
REACTOME_PATHWAY	R-HSA-419037:R-HSA-419037	12	1.38728	7.15089e-05	P05997, P12110, P04156, P12111, P20908, P12109, P02458, P08572, A0A087WXW9, O00468, P13591, P02461, P02462	4.25059	0.000871091
GOTERM_CC_DIRECT	GO:0044297~cell body	12	1.38728	0.000158879	P07437, P15311, P62873, P62879, Q8NCW5, P48643, P09455, P68032, P50990, P68133, P50991, Q99497	4.02696	0.0019955
GOTERM_MF_DIRECT	GO:0001968~fibronectin binding	12	1.38728	1.77102e-08	Q76M96, P06756, P05556, P43235, P29279, P31431, P24593, P07711, P23142, P07996, P17936, P25774	9.22039	1.02719e-06
GOTERM_MF_DIRECT	GO:0008307~structural constituent of muscle	12	1.38728	4.70049e-06	K7ENT6, Q08043, P07951, P60660, P35609, D6R904, Q15149, P09493, H7BYY1, P24844, P06753, P67936, Q5TCU3, Q14118, P35749, P14649, Q6ZN40	5.70786	0.000185371
GOTERM_MF_DIRECT	GO:0003755~peptidyl-prolyl cis-trans isomerase activity	12	1.38728	1.21955e-05	Q9Y536, P62937, P45877, P23284, Q15257, Q02790, O95302, P62942, Q96AY3, P26885, Q9Y680, Q00688	5.21153	0.000375704
GOTERM_MF_DIRECT	GO:0004197~cysteine-type endopeptidase activity	12	1.38728	0.000192654	P30101, P09936, Q13867, Q9UBR2, P43235, P45974, P07858, P07339, P07711, Q99538, P53634, P25774	3.93	0.00440828
GOTERM_MF_DIRECT	GO:0003725~double-stranded RNA binding	12	1.38728	0.000192654	Q12906, P12814, P08238, P02786, P08195, P10809, P08670, P26038, P68363, Q00610, P09429, P60842	3.93	0.00440828
GOTERM_MF_DIRECT	GO:0009055~electron carrier activity	12	1.38728	0.00516357	P99999, P14902, Q9H299, P35754, P00390, Q16881, P15121, P14550, O76003, P48163, P11766, Q9Y4K0	2.66367	0.0733563
GOTERM_MF_DIRECT	GO:0004222~metalloendopeptidase activity	12	1.38728	0.0258548	P24347, P13497, P08254, P08253, P52888, Q9UHI8, O14672, P50281, P09238, P14735, Q13219, P03956	2.12151	0.251889
REACTOME_PATHWAY	R-HSA-437239:R-HSA-437239	12	1.38728	0.000316557	P26038, P60709, P68363, P63010, Q16555, P35241, P15311, A0A1C7CYX9, Q9BQE3, O95782, Q13885, Q00610, Q96CW1	3.64336	0.00334206
KEGG_PATHWAY	hsa00480:Glutathione metabolism	12	1.38728	0.000855252	P00390, P78417, O75223, P48637, P30711, P09211, O75874, O95881, P52209, K7EM49, P15144, P28838, H0Y983, P48506	3.24366	0.0103762
KEGG_PATHWAY	hsa05134:Legionellosis	12	1.38728	0.00141064	P99999, P68104, P0DMV9, P26641, O75396, P11142, P10809, P54652, Q9ULZ3, P01024, P55072, P17066	3.06346	0.0155893
GOTERM_BP_DIRECT	GO:0007229~integrin-mediated signaling pathway	12	1.38728	0.0104909	P06756, O15230, P05556, O75326, P29279, Q9UHI8, P23142, O14672, P23229, P02461, P35579, Q96AC1	2.42021	0.202122
GOTERM_BP_DIRECT	GO:0045471~response to ethanol	12	1.38728	0.015864	Q9BRK5, P24821, P13639, P09211, P00441, P05362, P68032, P09486, P00505, P15289, P24534, Q92820	2.28191	0.273723
KEGG_PATHWAY	hsa05133:Pertussis	12	1.38728	0.0182999	P0DP23, P05155, P05556, Q9Y281, P61586, P09871, Q9ULZ3, P23528, P01024, P0C0L5, P06681, P00736	2.20569	0.116996
KEGG_PATHWAY	hsa05410:Hypertrophic cardiomyopathy (HCM)	12	1.38728	0.0239311	K7ENT6, P05556, P07951, P60709, D6R904, P02545, P09493, H7BYY1, P06756, P06753, P68032, P67936, Q5TCU3, P17661, P23229, Q14118, Q6ZN40	2.12086	0.137258
REACTOME_PATHWAY	R-HSA-877300:R-HSA-877300	12	1.38728	0.0327527	P42224, P30504, P05362, P13591, P18462, P61769, P30479, P16190, P32456, Q9H0R5, P32455, P30455, P16070, P13284, P16188, P30475	2.02869	0.197212
REACTOME_PATHWAY	R-HSA-2565942:R-HSA-2565942	12	1.38728	0.0327527	P62987, P07437, P07900, P62140, P62258, Q14203, P63208, Q15691, P30153, P43034, O95613, P61981	2.02869	0.197212
GOTERM_BP_DIRECT	GO:0000184~nuclear-transcribed mRNA catabolic process, nonsense-mediated decay	12	1.38728	0.0360733	H0YDD8, P05387, P05386, P05388, P62495, Q04637, P30153, P25398, P30050, P62987, Q9Y5S9, P62857, P61326	2.01345	0.474008
KEGG_PATHWAY	hsa05414:Dilated cardiomyopathy	12	1.38728	0.0388084	K7ENT6, P05556, P07951, P60709, D6R904, P02545, P09493, H7BYY1, P06756, P06753, P68032, P67936, Q5TCU3, P17661, P23229, Q14118, Q6ZN40	1.96937	0.205699
BIOCARTA	h_uCalpainPathway:uCalpain and friends in Cell spread	11	1.27168	1.81916e-06	P12814, P15311, Q08043, Q9Y490, P05556, P04632, P61586, P68133, P07384, P35609, Q13813	5.90714	0.000345581
REACTOME_PATHWAY	R-HSA-983170:R-HSA-983170	11	1.27168	3.41882e-06	P30101, P27824, P30504, P27797, Q9NZ08, P18462, Q6P179, P61769, Q15436, P30479, P16190, P30455, P11021, P16188, P30475	6.29414	5.01648e-05
GOTERM_BP_DIRECT	GO:0001895~retina homeostasis	11	1.27168	2.00292e-05	P01834, P61769, P02787, P02788, P01876, P02768, P00441, P60709, P04264, P04792, Q06830	5.49084	0.00123809
GOTERM_BP_DIRECT	GO:0006024~glycosaminoglycan biosynthetic process	11	1.27168	3.17469e-05	P06865, Q7Z7M9, P09619, Q16394, O00468, Q9UBQ6, P31431, P35052, P98160, P34741, Q93063	5.22938	0.00179561
REACTOME_PATHWAY	R-HSA-3928663:R-HSA-3928663	11	1.27168	6.80352e-05	P19105, P35580, P07900, P29317, Q7Z406, P24844, P60660, P61586, P35579, P35749, P54756	4.67564	0.000843075
REACTOME_PATHWAY	R-HSA-2129379:R-HSA-2129379	11	1.27168	0.000145846	P02751, P06756, P05556, A0A0A0MT20, Q9Y6C2, Q9UBX5, P04004, P23142, P35555, Q14767, O95967, P55083	4.30651	0.00169003
GOTERM_MF_DIRECT	GO:0003823~antigen binding	11	1.27168	0.0331867	P01834, P01861, P30479, P01857, P01876, P01859, P30504, Q9BZM5, P30153, Q9BUD6, P30475, P0DOY2	2.13352	0.298135
KEGG_PATHWAY	hsa00620:Pyruvate metabolism	11	1.27168	0.000421971	P40925, P40926, Q9BWD1, P00338, Q04760, P14618, P07954, P07195, P48163, P09622, Q9BYZ2	3.79103	0.00567057
GOTERM_BP_DIRECT	GO:0009612~response to mechanical stimulus	11	1.27168	0.000628027	P07585, P24821, P42224, Q9P2D7, P36222, P68133, Q15063, P07996, P50281, P02461, P78330	3.72261	0.0209716
GOTERM_BP_DIRECT	GO:0001523~retinoid metabolic process	11	1.27168	0.000823745	Q07954, P02649, P00352, P09455, O00468, P31431, Q99969, P35052, P11766, P98160, P34741	3.60055	0.0268839
GOTERM_BP_DIRECT	GO:0060333~interferon-gamma-mediated signaling pathway	11	1.27168	0.00269207	P42224, P30504, P05362, P13591, P18462, P61769, P30479, P16190, P32456, P32455, P30455, P16070, P13284, P16188, P30475	3.09343	0.0728694
GOTERM_BP_DIRECT	GO:0043086~negative regulation of catalytic activity	11	1.27168	0.00404121	P07355, Q9Y570, P48681, H0Y789, P01033, Q01105, P13489, O43390, A6NMY6, P21246, P08758, Q86VP6	2.92845	0.0995359
GOTERM_BP_DIRECT	GO:0034976~response to endoplasmic reticulum stress	11	1.27168	0.00404121	P13667, P30101, Q15084, P14625, P13639, Q8NBS9, P07237, P61960, H0Y3Z3, P07996, Q9Y4L1, Q9BS26	2.92845	0.0995359
KEGG_PATHWAY	hsa05150:Staphylococcus aureus infection	11	1.27168	0.00477218	P48740, P00751, P05156, P05362, P08603, P09871, P01024, P00746, P0C0L5, P06681, P00736	2.80817	0.0413485
GOTERM_CC_DIRECT	GO:0030133~transport vesicle	11	1.27168	0.0141713	P53621, O75396, Q9Y678, O60664, P21810, P11717, P48444, P08174, Q15643, P30040, O14579	2.44797	0.0961183
KEGG_PATHWAY	hsa05131:Shigellosis	11	1.27168	0.0158135	P07737, P18206, O15144, P05556, O15145, P60709, P59998, O15511, P16070, P46108, Q14247	2.3694	0.107162
GOTERM_BP_DIRECT	GO:0007179~transforming growth factor beta receptor signaling pathway	11	1.27168	0.0165141	P62987, Q15262, P05556, P61586, P17813, P62942, Q99988, Q5TG12, P02461, P08123, Q14767, Q96AC1	2.38732	0.281836
GOTERM_BP_DIRECT	GO:0035987~endodermal cell differentiation	10	1.15607	3.89685e-06	P08476, P02751, P06756, P12109, P08572, P08253, P04004, P07942, Q99715, P50281	7.39508	0.000295763
REACTOME_PATHWAY	R-HSA-2024096:R-HSA-2024096	10	1.15607	5.86252e-06	P16278, P54802, P35475, O00468, P31431, P35052, P22304, P98160, P51688, P34741	6.7623	8.26469e-05
GOTERM_BP_DIRECT	GO:0030203~glycosaminoglycan metabolic process	10	1.15607	7.60722e-06	P07585, P15586, O00468, P31431, P21810, P35052, Q6UVK1, P98160, P13611, P34741	6.88507	0.000529198
GOTERM_BP_DIRECT	GO:0002474~antigen processing and presentation of peptide antigen via MHC class I	10	1.15607	1.03875e-05	P30101, P27824, P30504, P27797, Q9NZ08, P18462, Q6P179, P61769, Q15436, P30479, P16190, P30455, P16188, P30475	6.65557	0.000693651
GOTERM_BP_DIRECT	GO:0030449~regulation of complement activation	10	1.15607	1.03875e-05	P00751, P05156, Q07021, P08603, P04004, P08174, P01024, P0C0L5, P07225, P06681	6.65557	0.000693651
GOTERM_BP_DIRECT	GO:2001237~negative regulation of extrinsic apoptotic signaling pathway	10	1.15607	8.25316e-05	P02545, P06756, P09211, P17931, P23229, P07996, P48506, O14786, Q99497, Q14247	5.2544	0.0039872
GOTERM_BP_DIRECT	GO:0010811~positive regulation of cell-substrate adhesion	10	1.15607	8.25316e-05	Q76M96, O43854, Q7Z7G0, P14543, A0A0A0MT20, Q9Y6C2, Q15404, P04004, O00622, P21246, P23229	5.2544	0.0039872
GOTERM_BP_DIRECT	GO:0010977~negative regulation of neuron projection development	10	1.15607	0.000274176	P61769, Q07954, P14314, P08670, Q02790, Q08629, P09382, P43034, Q14563, P23470	4.53789	0.0105932
GOTERM_MF_DIRECT	GO:0043236~laminin binding	10	1.15607	1.85159e-06	Q16610, P14543, P05556, O00468, P09382, P17931, P35052, P23229, P07996, P25774	7.99101	7.93738e-05
GOTERM_MF_DIRECT	GO:0004553~hydrolase activity, hydrolyzing O-glycosyl compounds	10	1.15607	1.03445e-05	P16278, P06865, P17050, Q9BWS9, P10253, P36222, P35475, Q04446, P07686, O00462	6.65917	0.000339933
GOTERM_MF_DIRECT	GO:0005080~protein kinase C binding	10	1.15607	0.000388099	P14314, P06756, Q96HC4, Q6IBS0, Q07021, P29966, P31431, O76003, P04792, P61981	4.34294	0.00762558
GOTERM_MF_DIRECT	GO:0005507~copper ion binding	10	1.15607	0.00170835	P08294, P04156, P02768, P00441, P19021, P35052, Q99584, O60888, Q99497, Q9Y4K0	3.56741	0.0272589
GOTERM_MF_DIRECT	GO:0008233~peptidase activity	10	1.15607	0.0357402	P48740, P05154, O14773, P20933, P13497, P09960, P07858, P05067, Q99538, Q99497	2.21972	0.311887
GOTERM_BP_DIRECT	GO:0032956~regulation of actin cytoskeleton organization	10	1.15607	0.000460754	Q9H299, Q07954, P15311, Q16658, P09619, P61586, Q6IBS0, P19021, P46108, P54756	4.24824	0.0165921
REACTOME_PATHWAY	R-HSA-390522:R-HSA-390522	10	1.15607	0.000474581	K7ENT6, Q08043, P07951, P35609, D6R904, P09493, H7BYY1, P06753, P08670, P68032, P68133, P67936, Q5TCU3, P17661, Q6ZN40	4.13251	0.00479558
GOTERM_BP_DIRECT	GO:0010467~gene expression	10	1.15607	0.000542278	P07910, P26599, P22626, O43390, Q14103, P31943, P61978, Q00839, Q15365, P38159	4.15973	0.0188898
REACTOME_PATHWAY	R-HSA-72203:R-HSA-72203	10	1.15607	0.000590407	P07910, P26599, P22626, O43390, Q14103, P31943, P61978, Q00839, Q15365, P38159	4.02082	0.00588026
KEGG_PATHWAY	hsa00270:Cysteine and methionine metabolism	10	1.15607	0.00124183	P40925, P40926, P17174, P00338, P00505, P07195, Q9BYZ2, Q9UHY7, P23526, Q13126	3.62778	0.0143553
REACTOME_PATHWAY	R-HSA-3928662:R-HSA-3928662	10	1.15607	0.00156618	P61160, O15144, O15145, P61586, P60709, P59998, O15511, P23528, P61158, P34741	3.54215	0.0143445
GOTERM_BP_DIRECT	GO:0016525~negative regulation of angiogenesis	10	1.15607	0.00351708	P35442, P07585, P29317, P36955, P42224, P08572, Q8IWU6, P09486, P21246, P07996	3.22044	0.0898466
REACTOME_PATHWAY	R-HSA-3928665:R-HSA-3928665	10	1.15607	0.00545124	P29317, P08253, P60709, Q00610, O95782, O14672, P53675, P63010, Q96CW1, P54756	2.97541	0.0431983
GOTERM_BP_DIRECT	GO:0048010~vascular endothelial growth factor receptor signaling pathway	10	1.15607	0.00948732	P07900, P06756, P30530, O60462, P61586, Q8IWU6, P60709, P46108, P04792, O14786	2.77315	0.186774
BIOCARTA	h_integrinPathway:Integrin Signaling Pathway	10	1.15607	0.0146397	P12814, Q08043, P18206, Q9Y490, P05556, P04632, P61586, P68133, P07384, P35609	2.46735	0.267538
GOTERM_CC_DIRECT	GO:0019898~extrinsic component of membrane	10	1.15607	0.0151051	P04083, P15311, P35241, P04156, Q5THJ4, P26038, Q9NZN4, Q9Y4F1, Q03405, Q10588	2.57824	0.099986
KEGG_PATHWAY	hsa05416:Viral myocarditis	10	1.15607	0.02019	P30504, P05362, P60709, Q04637, P18462, P99999, P30479, P16190, P30455, P55957, P08174, Q14118, P16188, P30475	2.41852	0.12531
GOTERM_CC_DIRECT	GO:0071013~catalytic step 2 spliceosome	10	1.15607	0.0296605	P07910, P22626, Q9Y5S9, O43390, P31943, P61978, Q00839, P61326, P38159, O60506	2.29799	0.175684
REACTOME_PATHWAY	R-HSA-3371453:R-HSA-3371453	10	1.15607	0.0434126	P0DMV9, P34932, P11142, P48723, P62258, P50502, P54652, P11021, P17066, Q92598	2.12529	0.24416
GOTERM_CC_DIRECT	GO:0043197~dendritic spine	10	1.15607	0.046819	P35580, P18085, Q15417, P27824, P05556, P05067, Q9Y4F1, P35609, P24043, Q14247	2.11415	0.245205
GOTERM_CC_DIRECT	GO:0071682~endocytic vesicle lumen	9	1.04046	2.20551e-07	P07900, P02649, P69905, P14625, P27797, P09486, P02790, Q9Y4L1, Q92598	11.8921	4.2456e-06
REACTOME_PATHWAY	R-HSA-1474244:R-HSA-1474244	9	1.04046	1.65879e-06	P02751, P05997, P20908, P02458, P08572, A0A087WXW9, P02452, I3L3H7, P02461, P08123, P02462	8.92623	2.53756e-05
GOTERM_CC_DIRECT	GO:0030863~cortical cytoskeleton	9	1.04046	4.25201e-06	K7ENT6, P15311, P47755, P47756, P60709, P21333, P67936, O43707, P35579, Q14247	8.64881	6.54789e-05
GOTERM_BP_DIRECT	GO:0043171~peptide catabolic process	9	1.04046	6.47815e-06	Q9H4A4, O14773, Q96KP4, P55786, P09960, Q9NZ08, Q9Y646, Q6P179, P15144	8.1682	0.000460258
REACTOME_PATHWAY	R-HSA-5627117:R-HSA-5627117	9	1.04046	9.41121e-06	P19105, P35580, P62140, Q7Z406, P24844, P60660, P61586, P35579, P35749	7.43852	0.00013012
REACTOME_PATHWAY	R-HSA-3000480:R-HSA-3000480	9	1.04046	1.53049e-05	P48740, P02649, P14625, P08572, P27797, P02452, I3L3H7, P02461, P08123, P02462	7.04702	0.000200058
KEGG_PATHWAY	hsa00511:Other glycan degradation	9	1.04046	1.63111e-05	P16278, P06865, O00754, P20933, Q9Y2E5, Q9BTY2, P04066, P07686, O00462	6.89279	0.000321155
REACTOME_PATHWAY	R-HSA-4420332:R-HSA-4420332	9	1.04046	2.40172e-05	P07585, O00468, P31431, P21810, P35052, Q6UVK1, P98160, P13611, P34741	6.69467	0.00030832
REACTOME_PATHWAY	R-HSA-3560801:R-HSA-3560801	9	1.04046	2.40172e-05	P07585, O00468, P31431, P21810, P35052, Q6UVK1, P98160, P13611, P34741	6.69467	0.00030832
REACTOME_PATHWAY	R-HSA-3560783:R-HSA-3560783	9	1.04046	2.40172e-05	P07585, O00468, P31431, P21810, P35052, Q6UVK1, P98160, P13611, P34741	6.69467	0.00030832
KEGG_PATHWAY	hsa00531:Glycosaminoglycan degradation	9	1.04046	2.64014e-05	P16278, P06865, P15586, P54802, P34059, P35475, P22304, P07686, P51688	6.53001	0.000482659
REACTOME_PATHWAY	R-HSA-1971475:R-HSA-1971475	9	1.04046	0.000207744	P07585, O00468, P31431, P21810, P35052, Q6UVK1, P98160, P13611, P34741	5.14975	0.0023314
GOTERM_BP_DIRECT	GO:0006911~phagocytosis, engulfment	9	1.04046	0.000267226	P01834, P01861, P01857, P06396, P01876, P01859, Q08431, P35579, P0DOY2	5.1343	0.0104469
REACTOME_PATHWAY	R-HSA-977606:R-HSA-977606	9	1.04046	0.000366678	P00751, P05156, P08603, P04004, P08174, P01024, P0C0L5, P07225, P06681	4.78191	0.0038143
GOTERM_MF_DIRECT	GO:0048407~platelet-derived growth factor binding	9	1.04046	5.45326e-09	P20908, P12109, P09619, P02458, A0A087WXW9, P16234, P02452, I3L3H7, P02461, P08123, P02462	16.3452	3.84066e-07
GOTERM_BP_DIRECT	GO:0034446~substrate adhesion-dependent cell spreading	9	1.04046	0.000486141	P02751, P06756, O15230, P30530, Q9H6X2, Q9NVD7, P07942, P11047, Q96AC1	4.72896	0.0173119
GOTERM_MF_DIRECT	GO:0050840~extracellular matrix binding	9	1.04046	2.63729e-05	P07585, P06756, P09486, P21810, Q9HCU0, P04004, O00622, P07996, Q15582	6.91529	0.000787691
GOTERM_MF_DIRECT	GO:0004177~aminopeptidase activity	9	1.04046	3.58434e-05	Q9H4A4, Q13867, P55786, P12955, P09960, Q9NZ08, Q6P179, P28838, P15144, H0Y983	6.65917	0.00100927
GOTERM_MF_DIRECT	GO:0043531~ADP binding	9	1.04046	0.000171659	P35580, P00367, P30049, P68133, P14618, P48163, P48506, P55072, P35579	5.44841	0.00422283
KEGG_PATHWAY	hsa00030:Pentose phosphate pathway	9	1.04046	0.000785379	P09972, P37837, P36871, O95336, Q96G03, P52209, P04075, K7EM49, P06744, P29401	4.27828	0.0100064
GOTERM_CC_DIRECT	GO:0030864~cortical actin cytoskeleton	9	1.04046	0.000799058	P68104, P17655, P35241, P06396, Q01518, P19022, Q14847, P60981, P35609	4.42497	0.00817336
GOTERM_MF_DIRECT	GO:0051287~NAD binding	9	1.04046	0.000484462	P40925, P04406, P31937, O75874, P00338, P07195, P48163, P09622, P23526	4.73152	0.00914628
GOTERM_MF_DIRECT	GO:0004175~endopeptidase activity	9	1.04046	0.00509939	P25788, P28072, O14773, P08254, Q9NZ08, O14672, P60900, Q6P179, P03956	3.32959	0.0735329
GOTERM_MF_DIRECT	GO:0048306~calcium-dependent protein binding	9	1.04046	0.00788943	P07355, P48740, P04083, P26447, P06703, P31949, Q8WUM4, P01023, P08133	3.09996	0.0988928
GOTERM_BP_DIRECT	GO:0030155~regulation of cell adhesion	9	1.04046	0.00115577	O15230, P62140, P05362, P17813, P30153, Q16363, P25391, P24043, Q99574	4.17908	0.0357829
REACTOME_PATHWAY	R-HSA-1592389:R-HSA-1592389	9	1.04046	0.00121553	P24347, H0Y789, P16035, P01033, P43235, P08254, P08253, P50281, P09238, P03956	4.05738	0.0114406
GOTERM_BP_DIRECT	GO:0043434~response to peptide hormone	9	1.04046	0.00135168	H0Y789, P04083, P01033, P42224, P02452, P29279, P09486, O76061, P08174, I3L3H7, Q14118	4.0841	0.0413423
GOTERM_BP_DIRECT	GO:0006687~glycosphingolipid metabolic process	9	1.04046	0.00157308	P16278, P10619, P17900, P06865, Q13510, Q07812, P15289, P07686, P07602	3.99334	0.0466776
GOTERM_BP_DIRECT	GO:0031532~actin cytoskeleton reorganization	9	1.04046	0.00210152	P04083, P15311, Q13308, Q9H6X2, Q9NVD7, P61586, P21333, P35579, Q14247	3.82341	0.0608089
GOTERM_BP_DIRECT	GO:0006139~nucleobase-containing compound metabolic process	9	1.04046	0.00276032	P84090, P00491, P54819, O95861, A0A1C7CYX9, Q9Y3B8, P00568, P30085, Q16555, Q13126	3.66735	0.0734612
GOTERM_BP_DIRECT	GO:0042542~response to hydrogen peroxide	9	1.04046	0.00357003	P42224, P69905, P13639, P09619, P10809, P00441, P04179, P02452, P00338, I3L3H7	3.52354	0.0904484
GOTERM_CC_DIRECT	GO:0031594~neuromuscular junction	9	1.04046	0.00407769	P35580, P05556, Q08629, P21246, Q15063, P17661, P05067, P07093, P35579	3.45952	0.0348296
GOTERM_BP_DIRECT	GO:0048146~positive regulation of fibroblast proliferation	9	1.04046	0.00511527	P07355, P02751, Q9GZP0, P09619, P06703, P16234, Q16832, P23142, Q9NRA1	3.32778	0.118339
REACTOME_PATHWAY	R-HSA-975634:R-HSA-975634	9	1.04046	0.00702157	Q07954, P02649, P01130, P09455, O00468, P31431, P35052, P98160, P34741	3.1138	0.0541524
GOTERM_BP_DIRECT	GO:0036498~IRE1-mediated unfolded protein response	9	1.04046	0.00876425	Q15084, P02545, O14773, Q9Y490, Q14203, Q969H8, P51858, P11021, Q9Y4L1	3.04577	0.176929
REACTOME_PATHWAY	R-HSA-1660662:R-HSA-1660662	9	1.04046	0.00927845	P16278, P10619, P17900, P06865, Q13510, Q9BSJ8, P15289, P07686, P07602	2.97541	0.0695326
GOTERM_BP_DIRECT	GO:0006006~glucose metabolic process	9	1.04046	0.0182152	Q01469, P04406, P36871, P10253, Q96G03, P24593, P14550, P46926, P35555	2.68209	0.30167
BIOCARTA	h_mPRPathway:How Progesterone Initiates the Oocyte Maturation	9	1.04046	0.025496	P61160, P62873, O15144, Q01518, O15145, P68133, P59998, O15511, P61158	2.41656	0.314404
GOTERM_BP_DIRECT	GO:0007015~actin filament organization	9	1.04046	0.0269379	K7ENT6, P07951, P04075, Q16643, Q14517, D6R904, P12814, P09493, H7BYY1, Q16658, P06753, P67936, Q5TCU3, Q6ZN40	2.49584	0.394157
GOTERM_CC_DIRECT	GO:0001772~immunological synapse	8	0.924855	0.000900358	P15311, P60033, H0YDL9, P05362, P52565, Q8WUM4, P17931, Q13740, P35579	4.97448	0.00876879
GOTERM_BP_DIRECT	GO:0046688~response to copper ion	8	0.924855	3.45601e-06	P08294, P04156, P00441, P05362, P30049, P19021, Q99584, Q9Y4K0	10.6489	0.000274798
GOTERM_BP_DIRECT	GO:0030207~chondroitin sulfate catabolic process	8	0.924855	1.92646e-06	P07585, P06865, P35475, P21810, P22304, P07686, Q6UVK1, P13611	11.4095	0.000169311
GOTERM_BP_DIRECT	GO:0042026~protein refolding	8	0.924855	3.45601e-06	P0DMV9, P61769, P07900, P11142, P10809, P62942, P54652, P17066	10.6489	0.000274798
REACTOME_PATHWAY	R-HSA-2024101:R-HSA-2024101	8	0.924855	1.3412e-05	P07585, P06865, P35475, P21810, P22304, P07686, Q6UVK1, P13611	8.50117	0.000178563
REACTOME_PATHWAY	R-HSA-5625900:R-HSA-5625900	8	0.924855	6.35979e-05	P19105, P35580, Q7Z406, P24844, P60660, P61586, P35579, P35749	7.00096	0.000801929
GOTERM_BP_DIRECT	GO:0048041~focal adhesion assembly	8	0.924855	0.000125084	P12814, Q15262, Q08043, O15230, Q5TG12, P04216, P35609, Q96AC1, Q14247	6.65557	0.00563013
GOTERM_BP_DIRECT	GO:0046686~response to cadmium ion	8	0.924855	0.000166276	P61769, P48637, P04156, P04179, P09486, P06744, P12004, P48506	6.38935	0.00700582
GOTERM_BP_DIRECT	GO:0015949~nucleobase-containing small molecule interconversion	8	0.924855	0.000166276	P35754, P54819, P00390, P10599, P00568, Q16881, P30085, P15531	6.38935	0.00700582
GOTERM_CC_DIRECT	GO:0019013~viral nucleocapsid	8	0.924855	0.000253723	P07910, Q32P51, Q09666, O43390, Q14103, P61978, P31942, O60506	6.04044	0.0028905
REACTOME_PATHWAY	R-HSA-140837:R-HSA-140837	8	0.924855	0.000414926	P00742, P05154, P05155, P01008, Q07021, P07093, P42785, P01023	5.40984	0.00425369
GOTERM_BP_DIRECT	GO:1900740~positive regulation of protein insertion into mitochondrial membrane involved in apoptotic signaling pathway	8	0.924855	0.000565871	Q96FJ2, P27348, P62258, Q04917, P55957, P31946, P61981, P63104	5.32446	0.0195005
BIOCARTA	h_cdc42racPathway:Role of PI3K subunit p85 in regulation of Actin Organization and Cell Migration	8	0.924855	0.000788093	P61160, O15144, O15145, P61586, P16234, P59998, O15511, P61158	4.56461	0.0367566
REACTOME_PATHWAY	R-HSA-416572:R-HSA-416572	8	0.924855	0.000980122	P19105, P35580, Q7Z406, P24844, P60660, P61586, P35579, P35749	4.76066	0.00948251
REACTOME_PATHWAY	R-HSA-499943:R-HSA-499943	8	0.924855	0.00126468	P35754, P54819, P00390, P10599, P00568, Q16881, P30085, P15531	4.57755	0.0117471
GOTERM_MF_DIRECT	GO:0003756~protein disulfide isomerase activity	8	0.924855	6.70696e-05	P13667, P30101, Q15084, O00391, Q8NBS9, P07237, H0Y3Z3, P30040, Q9BS26	7.26455	0.00178578
GOTERM_MF_DIRECT	GO:0008234~cysteine-type peptidase activity	8	0.924855	0.00246972	P17655, Q13867, Q9UBR2, P43235, P07858, P07711, P53634, P25774	4.20579	0.0379616
GOTERM_MF_DIRECT	GO:0031072~heat shock protein binding	8	0.924855	0.00444093	P0DMV9, Q16543, P11142, Q12907, P08238, Q02790, P29692, P17066	3.80524	0.0652868
GOTERM_BP_DIRECT	GO:0007162~negative regulation of cell adhesion	8	0.924855	0.00211027	P24821, P55290, P52565, P23142, O14672, O15031, Q5JRA6, Q15582	4.31713	0.0605308
GOTERM_MF_DIRECT	GO:0016757~transferase activity, transferring glycosyl groups	8	0.924855	0.0318707	P15291, Q16394, Q86SR1, P46976, Q10472, O43505, Q10471, Q93063	2.62	0.293288
GOTERM_MF_DIRECT	GO:0050839~cell adhesion molecule binding	8	0.924855	0.0344386	P15311, Q92692, P05556, K7EKE8, P16870, Q8NFZ8, P15151, P26038, Q15063	2.57774	0.304926
GOTERM_MF_DIRECT	GO:0003774~motor activity	8	0.924855	0.0460672	P35580, Q96FJ2, Q7Z406, Q14203, P60660, P35579, P14649, P35749	2.42152	0.363311
GOTERM_BP_DIRECT	GO:0006605~protein targeting	8	0.924855	0.00289086	Q16543, P27348, P62258, Q02952, P31946, P61981, Q14767, P63104	4.09573	0.0761983
BIOCARTA	h_compPathway:Complement Pathway	8	0.924855	0.00365006	P48740, P00751, P09871, P01024, P00746, P0C0L5, P06681, P00736	3.65169	0.109344
GOTERM_BP_DIRECT	GO:0060348~bone development	8	0.924855	0.00445365	P23284, P17813, Q8IWU6, P52823, P09486, P13797, Q9HBR0, Q9NRA1	3.80318	0.107568
GOTERM_BP_DIRECT	GO:0007566~embryo implantation	8	0.924855	0.00445365	Q16270, P00441, Q02790, P08253, P52823, O76061, P23142, P01034	3.80318	0.107568
KEGG_PATHWAY	hsa00020:Citrate cycle (TCA cycle)	8	0.924855	0.00470161	P40925, P40926, O75874, P53396, P07954, Q99798, P09622, P21399	3.67615	0.0421724
KEGG_PATHWAY	hsa00052:Galactose metabolism	8	0.924855	0.00470161	Q16851, P16278, P36871, P15291, P10253, Q96G03, P15121, P19367	3.67615	0.0421724
BIOCARTA	h_actinYPathway:Y branching of actin filaments	8	0.924855	0.00498005	P61160, O15144, O14818, O15145, P68133, P59998, O15511, P61158	3.4778	0.12673
GOTERM_BP_DIRECT	GO:0045429~positive regulation of nitric oxide biosynthetic process	8	0.924855	0.00509491	O94760, O95865, P07900, P08238, P26022, P04179, P05362, P10909	3.71474	0.118715
BIOCARTA	h_mCalpainPathway:mCalpain and friends in Cell motility	8	0.924855	0.0066447	P17655, P15311, Q15746, Q9Y490, P05556, P04632, P68133, P07384	3.31971	0.146439
GOTERM_BP_DIRECT	GO:0050885~neuromuscular process controlling balance	8	0.924855	0.00743666	P17900, P35580, O14773, P10253, P49588, P43034, P05067, P07686	3.47247	0.15503
REACTOME_PATHWAY	R-HSA-432720:R-HSA-432720	8	0.924855	0.00764262	P11142, O00115, P15586, Q9UBR2, Q8NBS9, Q00610, Q10567, P05067	3.40047	0.0581961
GOTERM_CC_DIRECT	GO:0016459~myosin complex	8	0.924855	0.00870074	P19105, P35580, Q96FJ2, Q7Z406, P60660, P35579, P14649, P35749	3.38265	0.0666866
GOTERM_CC_DIRECT	GO:0005905~clathrin-coated pit	8	0.924855	0.0144414	Q07954, P02787, P01130, P02786, P10809, P53675, P05067, Q14247	3.07513	0.0968138
REACTOME_PATHWAY	R-HSA-5674135:R-HSA-5674135	8	0.924855	0.0158633	P46940, P02751, P18206, Q9Y490, P60709, P30086, P31946, P61224	2.97541	0.108609
GOTERM_BP_DIRECT	GO:0070301~cellular response to hydrogen peroxide	8	0.924855	0.0229444	P27695, P04083, P30530, Q9GZP0, P15121, P12004, Q99497, P01034	2.80234	0.353089
GOTERM_BP_DIRECT	GO:0006950~response to stress	8	0.924855	0.0319491	P07900, Q58FF7, P08238, P14625, P15121, Q58FG1, O95433, P06748	2.61858	0.44182
GOTERM_BP_DIRECT	GO:0050727~regulation of inflammatory response	8	0.924855	0.0372301	P04083, P02765, P15090, O75326, Q9ULZ3, Q96PD5, P60900, Q99497	2.53545	0.481385
GOTERM_BP_DIRECT	GO:0043087~regulation of GTPase activity	8	0.924855	0.0430549	P46940, P35241, P00441, Q9ULZ3, P43034, O15031, P46108, P54756	2.45744	0.525809
GOTERM_CC_DIRECT	GO:0019773~proteasome core complex, alpha-subunit complex	7	0.809249	2.82125e-07	A0A024RA52, P25788, P25789, P25786, O14818, P60900, P28066	18.4988	5.26632e-06
GOTERM_CC_DIRECT	GO:0005885~Arp2/3 protein complex	7	0.809249	7.90392e-06	A0A0A6YYG9, P61160, O15144, O15145, P59998, O15511, P61158	12.3326	0.000115918
GOTERM_BP_DIRECT	GO:0042340~keratan sulfate catabolic process	7	0.809249	1.09699e-05	P51888, P16278, P06865, P51884, P15586, P34059, P07686	11.6472	0.000718167
GOTERM_BP_DIRECT	GO:0051016~barbed-end actin filament capping	7	0.809249	3.26972e-05	P52907, P35241, P47755, P06396, P47756, Q6IBS0, Q12792	9.98335	0.00181852
GOTERM_CC_DIRECT	GO:0005605~basal lamina	7	0.809249	3.78795e-05	P02751, O15230, P14543, O00468, Q16363, P55268, P24043	9.86605	0.000530182
GOTERM_BP_DIRECT	GO:0033627~cell adhesion mediated by integrin	7	0.809249	5.21913e-05	P06756, P05556, P05362, P48745, P04004, P23229, P35555	9.3178	0.0027201
GOTERM_BP_DIRECT	GO:0043277~apoptotic cell clearance	7	0.809249	5.21913e-05	Q15084, Q07954, P21980, P06756, P30530, Q8NBS9, P09429	9.3178	0.0027201
REACTOME_PATHWAY	R-HSA-2022857:R-HSA-2022857	7	0.809249	0.000101717	P51888, P16278, P06865, P51884, P15586, P34059, P07686	8.01072	0.00121823
GOTERM_BP_DIRECT	GO:0006414~translational elongation	7	0.809249	0.000170095	P68104, P26641, P05387, H0YDD8, P13639, P05386, P29692, P24534	7.76483	0.00707692
BIOCARTA	h_glycolysisPathway:Glycolysis Pathway	7	0.809249	0.000222493	P60174, P04406, P18669, P00558, P06733, P06744, P19367	6.39045	0.013994
GOTERM_BP_DIRECT	GO:0048260~positive regulation of receptor-mediated endocytosis	7	0.809249	0.00023813	P07355, P61769, P02787, P50897, P05121, P04004, P61978	7.35615	0.00942495
REACTOME_PATHWAY	R-HSA-111447:R-HSA-111447	7	0.809249	0.000264112	P27348, P62258, Q04917, P55957, P31946, P61981, P63104	6.94262	0.00287347
GOTERM_BP_DIRECT	GO:0042730~fibrinolysis	7	0.809249	0.000437045	P07355, P00750, P05155, P05121, P04264, Q03405, P07225	6.65557	0.0160919
GOTERM_BP_DIRECT	GO:0034314~Arp2/3 complex-mediated actin nucleation	7	0.809249	0.000575703	A0A0A6YYG9, P61160, O15144, O15145, P59998, O15511, P61158	6.35304	0.0196336
GOTERM_CC_DIRECT	GO:0005790~smooth endoplasmic reticulum	7	0.809249	0.00111549	P27824, P23284, P27797, P11021, P05067, Q9Y4L1, P30040	5.69195	0.0106851
BIOCARTA	h_salmonellaPathway:How does salmonella hijack a cell	7	0.809249	0.001371	P61160, O15144, O15145, P68133, P59998, O15511, P61158	4.91573	0.0507979
GOTERM_BP_DIRECT	GO:0048678~response to axon injury	7	0.809249	0.00184429	O00339, P18085, Q07812, P00441, P04179, P09382, P01034	5.17655	0.0540317
REACTOME_PATHWAY	R-HSA-381426:R-HSA-381426	7	0.809249	0.00202415	P22692, P08253, P24592, P24593, P17936, Q13219, P03956	4.95902	0.0178249
GOTERM_BP_DIRECT	GO:0006910~phagocytosis, recognition	7	0.809249	0.00224933	P01834, P01861, P01857, P01876, P01859, Q08431, P0DOY2	4.99168	0.0627808
GOTERM_BP_DIRECT	GO:0006099~tricarboxylic acid cycle	7	0.809249	0.00271789	P40925, P40926, O75874, P07954, Q99798, P09622, P21399	4.81955	0.0729528
GOTERM_BP_DIRECT	GO:0048008~platelet-derived growth factor receptor signaling pathway	7	0.809249	0.00271789	P46940, P00750, Q9GZP0, P09619, P16234, O14786, Q9NRA1	4.81955	0.0729528
GOTERM_BP_DIRECT	GO:0051017~actin filament bundle assembly	7	0.809249	0.00325589	P12814, Q14651, P15311, Q16658, O43707, P13797, P13796	4.6589	0.0840945
REACTOME_PATHWAY	R-HSA-373753:R-HSA-373753	7	0.809249	0.00335654	P46940, P12814, Q01082, Q08043, O43707, P35609, Q13813	4.5278	0.0283685
GOTERM_MF_DIRECT	GO:0043394~proteoglycan binding	7	0.809249	5.71051e-06	P14543, P20908, P43235, A0A087WXW9, P07858, P07711, P07996, P25774	12.713	0.000208518
GOTERM_MF_DIRECT	GO:0004180~carboxypeptidase activity	7	0.809249	0.000118046	P10619, Q8IUX7, Q13867, Q96KP4, P16870, Q9Y646, P42785	8.22604	0.00305849
GOTERM_BP_DIRECT	GO:0046034~ATP metabolic process	7	0.809249	0.00456443	P0DMV9, P06576, P11142, P54819, P00568, Q9NTK5, P55072	4.36772	0.108534
GOTERM_MF_DIRECT	GO:0005539~glycosaminoglycan binding	7	0.809249	0.000169608	P07585, P05154, P17813, P21810, P07093, Q99645, P13611	7.76903	0.00427923
GOTERM_MF_DIRECT	GO:0005504~fatty acid binding	7	0.809249	0.000237454	O14561, Q01469, P02768, P15090, P52565, P41222, P11766	7.36014	0.00518999
GOTERM_BP_DIRECT	GO:0071526~semaphorin-plexin signaling pathway	7	0.809249	0.00534722	P52565, O75326, P21333, Q13214, O15031, Q14563, O14786	4.23536	0.121699
GOTERM_MF_DIRECT	GO:0005528~FK506 binding	7	0.809249	0.000324954	Q02790, O95302, P62942, Q96AY3, P26885, Q9Y680, Q00688	6.99213	0.00679504
GOTERM_MF_DIRECT	GO:0070006~metalloaminopeptidase activity	7	0.809249	0.000744164	Q9H4A4, P55786, P09960, Q9NZ08, P50281, Q6P179, P15144	6.08011	0.0132571
GOTERM_MF_DIRECT	GO:0051020~GTPase binding	7	0.809249	0.00149296	P07900, Q01082, P62873, P62879, P06733, P21333, P13796	5.37856	0.0246597
GOTERM_MF_DIRECT	GO:0051219~phosphoprotein binding	7	0.809249	0.00620822	P00750, P14314, P62258, Q02790, P11717, P43034, P31946	4.11302	0.0851462
GOTERM_MF_DIRECT	GO:0003746~translation elongation factor activity	7	0.809249	0.00620822	P68104, Q6IS14, P26641, P13639, P29692, P24534, P63241	4.11302	0.0851462
GOTERM_MF_DIRECT	GO:0004364~glutathione transferase activity	7	0.809249	0.00718257	P26641, O00299, P30711, Q9Y696, P09211, O95833, P78417	3.9955	0.095259
GOTERM_MF_DIRECT	GO:0030145~manganese ion binding	7	0.809249	0.0375312	P15291, P04179, P12955, P48163, P28838, H0Y983, Q10472, Q10471	2.79685	0.319467
GOTERM_MF_DIRECT	GO:0043022~ribosome binding	7	0.809249	0.0408094	Q6IS14, P13639, P62495, P11021, Q9NTK5, P56537, P63241	2.74201	0.339641
GOTERM_CC_DIRECT	GO:0030017~sarcomere	7	0.809249	0.00939112	P0DP23, P09493, H7BYY1, P47756, P08253, P68032, P68133, P60900, Q6ZN40	3.79463	0.0709317
REACTOME_PATHWAY	R-HSA-389957:R-HSA-389957	7	0.809249	0.00941165	P48643, Q9BQE3, P60709, P50990, Q13885, P50991, Q9NQP4	3.71926	0.0697761
GOTERM_CC_DIRECT	GO:0030669~clathrin-coated endocytic vesicle membrane	7	0.809249	0.0119538	P01130, P21926, Q00610, O95782, Q10567, P63010, Q96CW1	3.60953	0.0863798
GOTERM_BP_DIRECT	GO:0006418~tRNA aminoacylation for protein translation	7	0.809249	0.0137926	P49590, P49589, P49588, P26639, P12081, P41250, P23381	3.49417	0.248997
REACTOME_PATHWAY	R-HSA-2022928:R-HSA-2022928	7	0.809249	0.0155107	Q16394, O00468, P31431, P35052, P98160, P34741, Q93063	3.35933	0.107324
BIOCARTA	h_amiPathway:Acute Myocardial Infarction	7	0.809249	0.0205947	P10646, P00742, P00750, P08572, P01008, P07225, P02462	3.04307	0.301933
REACTOME_PATHWAY	R-HSA-5694530:R-HSA-5694530	7	0.809249	0.0208355	Q15436, O75396, Q12907, Q9UBR2, Q5JRA6, Q8NI22, P53634	3.15574	0.136689
GOTERM_CC_DIRECT	GO:0032154~cleavage furrow	7	0.809249	0.0225167	P35580, Q15746, P35241, P05556, Q96RW7, P61586, P35579	3.14874	0.14143
KEGG_PATHWAY	hsa00500:Starch and sucrose metabolism	7	0.809249	0.0289562	Q16851, P36871, P10253, Q96G03, Q04446, P06744, P19367	2.92421	0.160489
REACTOME_PATHWAY	R-HSA-5663213:R-HSA-5663213	7	0.809249	0.0309428	P61160, O15144, O15145, P60709, P59998, O15511, P61158	2.89276	0.190395
GOTERM_CC_DIRECT	GO:0005791~rough endoplasmic reticulum	7	0.809249	0.0322712	Q02818, P27824, P10809, P41222, P05067, P54756, Q8NBP7	2.90178	0.188052
GOTERM_BP_DIRECT	GO:0071560~cellular response to transforming growth factor beta stimulus	7	0.809249	0.0345023	O14737, Q9GZP0, P08572, P05452, P02452, Q15063, I3L3H7, P35555	2.85239	0.46056
GOTERM_CC_DIRECT	GO:0045111~intermediate filament cytoskeleton	7	0.809249	0.0350787	P48681, Q15149, P08670, P13646, P35908, P50990, P17661	2.84598	0.197454
GOTERM_CC_DIRECT	GO:0012507~ER to Golgi transport vesicle membrane	7	0.809249	0.0350787	Q15436, P61769, O75396, P16190, P30479, P30504, P30455, P18462, Q8NI22, P16188, P30475	2.84598	0.197454
GOTERM_BP_DIRECT	GO:0007519~skeletal muscle tissue development	7	0.809249	0.0408979	P07585, Q7Z406, Q969P0, Q9Y281, P60660, O75369, P14649	2.74053	0.510923
GOTERM_BP_DIRECT	GO:0034097~response to cytokine	7	0.809249	0.044358	H0Y789, P16035, P01033, P42224, Q14624, P09486, P02461, P13686	2.68783	0.534836
GOTERM_BP_DIRECT	GO:0071320~cellular response to cAMP	7	0.809249	0.044358	P27695, P15311, P05388, P52823, P24593, P05067, P61224	2.68783	0.534836
GOTERM_BP_DIRECT	GO:0006098~pentose-phosphate shunt	6	0.693642	0.000111079	P60174, P37837, O95336, Q96G03, P52209, K7EM49, P29401	10.8909	0.00506961
GOTERM_CC_DIRECT	GO:0034663~endoplasmic reticulum chaperone complex	6	0.693642	8.46934e-05	Q15084, P14625, P23284, P07237, P11021, H0Y3Z3, Q9Y4L1	11.5317	0.00113356
GOTERM_BP_DIRECT	GO:0009313~oligosaccharide catabolic process	6	0.693642	0.000111079	P17900, O00754, Q01459, Q9Y2E5, P07686, O00462	10.8909	0.00506961
GOTERM_BP_DIRECT	GO:0043206~extracellular fibril organization	6	0.693642	0.000182585	P20908, A0A087WXW9, P62942, P02461, Q14767, P01034, P55083	9.98335	0.00750121
GOTERM_BP_DIRECT	GO:0031581~hemidesmosome assembly	6	0.693642	0.000182585	P48509, Q15149, P13647, P02533, P11047, P23229	9.98335	0.00750121
GOTERM_BP_DIRECT	GO:0034975~protein folding in endoplasmic reticulum	6	0.693642	0.000284506	Q9P0L0, P30101, P27824, P14625, P27797, P11021	9.2154	0.0108645
GOTERM_CC_DIRECT	GO:0031089~platelet dense granule lumen	6	0.693642	0.000325882	Q16610, Q14624, P05452, Q99969, Q08380, Q92520	9.06066	0.00357887
REACTOME_PATHWAY	R-HSA-1236977:R-HSA-1236977	6	0.693642	0.000713194	P61769, P16190, P30479, P30504, P30455, P07711, P18462, P16188, P25774, P30475	7.43852	0.00700235
REACTOME_PATHWAY	R-HSA-75035:R-HSA-75035	6	0.693642	0.000713194	P27348, P62258, Q04917, P31946, P61981, P63104	7.43852	0.00700235
GOTERM_CC_DIRECT	GO:0031143~pseudopodium	6	0.693642	0.000894799	P12814, P17655, Q08043, P26038, O43707, P35609	7.46172	0.00885481
REACTOME_PATHWAY	R-HSA-879415:R-HSA-879415	6	0.693642	0.00109537	P52907, P14314, P47755, P17931, P05067, P09429	6.86633	0.0104517
REACTOME_PATHWAY	R-HSA-3656253:R-HSA-3656253	6	0.693642	0.00109537	Q16394, O00468, P31431, P35052, P98160, P34741	6.86633	0.0104517
REACTOME_PATHWAY	R-HSA-3656237:R-HSA-3656237	6	0.693642	0.00109537	O00468, P31431, P35052, P98160, P34741, Q93063	6.86633	0.0104517
REACTOME_PATHWAY	R-HSA-75205:R-HSA-75205	6	0.693642	0.00109537	P07355, P00750, P05121, P07093, P35237, Q03405	6.86633	0.0104517
REACTOME_PATHWAY	R-HSA-171052:R-HSA-171052	6	0.693642	0.00109537	P01130, Q00610, O95782, P63010, Q96CW1, Q8NBP7	6.86633	0.0104517
REACTOME_PATHWAY	R-HSA-1679131:R-HSA-1679131	6	0.693642	0.00109537	P14625, P43235, P07858, P07711, Q99538, P25774	6.86633	0.0104517
GOTERM_CC_DIRECT	GO:0043034~costamere	6	0.693642	0.0015542	Q14315, Q15149, P18206, Q09666, P31431, Q14118	6.67627	0.0146324
GOTERM_CC_DIRECT	GO:0031258~lamellipodium membrane	6	0.693642	0.0015542	P29317, P06756, Q9H6X2, P23528, Q6UVK1, Q96AC1	6.67627	0.0146324
REACTOME_PATHWAY	R-HSA-3371568:R-HSA-3371568	6	0.693642	0.0016106	P0DMV9, P07900, P11142, P08238, Q02790, P54652	6.37588	0.0145632
REACTOME_PATHWAY	R-HSA-3322077:R-HSA-3322077	6	0.693642	0.00228385	P62987, Q16851, P36871, Q96G03, Q04446, P46976	5.95082	0.0198487
GOTERM_BP_DIRECT	GO:0042744~hydrogen peroxide catabolic process	6	0.693642	0.00255891	P30041, P69905, P30044, Q92626, P32119, Q06830	5.99001	0.0699556
GOTERM_BP_DIRECT	GO:0006090~pyruvate metabolic process	6	0.693642	0.00400031	P00338, Q04760, P07195, P48163, P09622, Q9BYZ2	5.44547	0.0993085
GOTERM_CC_DIRECT	GO:0002102~podosome	6	0.693642	0.00467081	K7ENT6, P06396, Q16658, P67936, P61978, P13796, Q14247	5.28538	0.0392634
GOTERM_CC_DIRECT	GO:0036464~cytoplasmic ribonucleoprotein granule	6	0.693642	0.00561516	P46940, P07437, P05388, P60709, Q00839, P19338	5.07397	0.046405
KEGG_PATHWAY	hsa01210:2-Oxocarboxylic acid metabolism	6	0.693642	0.00580786	O75874, P17174, P00505, Q99798, P54687, P21399	4.8655	0.0484898
GOTERM_BP_DIRECT	GO:0002040~sprouting angiogenesis	6	0.693642	0.0071295	P55290, Q9NVD7, P17813, P07996, O14786, Q9Y4K0	4.79201	0.150989
GOTERM_MF_DIRECT	GO:0031994~insulin-like growth factor I binding	6	0.693642	0.000182134	P06756, P22692, P24592, P24593, P23229, P17936	9.98876	0.00426707
GOTERM_MF_DIRECT	GO:0044548~S100 protein binding	6	0.693642	0.00028381	P07355, P46940, P15311, P06703, Q09666, P31949	9.22039	0.00606581
GOTERM_MF_DIRECT	GO:0004185~serine-type carboxypeptidase activity	6	0.693642	0.000423371	P10619, Q8IUX7, P16870, Q9UHL4, Q66K79, P42785	8.56179	0.00815349
GOTERM_MF_DIRECT	GO:0008484~sulfuric ester hydrolase activity	6	0.693642	0.000609038	P15586, P34059, Q8IWU6, P15289, P22304, P51688	7.99101	0.0110623
GOTERM_MF_DIRECT	GO:0023026~MHC class II protein complex binding	6	0.693642	0.000849625	P07900, P11142, P08238, P62258, P60033, H0YDL9, P14618	7.49157	0.0148544
GOTERM_MF_DIRECT	GO:0005520~insulin-like growth factor binding	6	0.693642	0.00153323	Q16270, P29279, P48745, O00622, Q92743, P17936	6.65917	0.0249002
GOTERM_BP_DIRECT	GO:0050871~positive regulation of B cell activation	6	0.693642	0.00847057	P01834, P01861, P01857, P01876, P01859, P0DOY2	4.6077	0.172557
GOTERM_BP_DIRECT	GO:0005978~glycogen biosynthetic process	6	0.693642	0.00847057	P62987, Q16851, P36871, Q96G03, Q04446, P46976	4.6077	0.172557
GOTERM_BP_DIRECT	GO:0031032~actomyosin structure organization	6	0.693642	0.00997654	Q99439, P35580, Q15417, Q7Z406, P68032, P35579	4.43705	0.194311
GOTERM_BP_DIRECT	GO:0002224~toll-like receptor signaling pathway	6	0.693642	0.00997654	P14625, P43235, P07858, P07711, Q99538, P25774	4.43705	0.194311
GOTERM_MF_DIRECT	GO:0015035~protein disulfide oxidoreductase activity	6	0.693642	0.0059308	O43396, Q9H299, P35754, P10599, Q16881, O76003	4.99438	0.0826376
GOTERM_BP_DIRECT	GO:0032689~negative regulation of interferon-gamma production	6	0.693642	0.0116564	P04156, P30530, Q07021, Q96PD5, P09429, Q9BQ51	4.27858	0.218309
GOTERM_BP_DIRECT	GO:0050690~regulation of defense response to virus by virus	6	0.693642	0.0116564	P61769, P16190, P30455, O95782, P18462, Q10567, P63010, P16188, Q96CW1	4.27858	0.218309
GOTERM_MF_DIRECT	GO:0034987~immunoglobulin receptor binding	6	0.693642	0.00845218	P01834, P01861, P01857, P01876, P01859, P0DOY2	4.6102	0.102993
GOTERM_BP_DIRECT	GO:0001937~negative regulation of endothelial cell proliferation	6	0.693642	0.0135186	P02649, P42224, P17813, Q8IWU6, P09486, P07996	4.13104	0.245998
GOTERM_BP_DIRECT	GO:0050766~positive regulation of phagocytosis	6	0.693642	0.0135186	Q12907, P02765, P26022, P27797, Q9ULZ3, P01024	4.13104	0.245998
REACTOME_PATHWAY	R-HSA-140875:R-HSA-140875	6	0.693642	0.0135531	P00742, P05154, Q9UNN8, P01008, P07093, P07225	4.05738	0.0971522
GOTERM_MF_DIRECT	GO:0004869~cysteine-type endopeptidase inhibitor activity	6	0.693642	0.025773	P04080, P02765, Q08629, P01037, P20810, P01034	3.52544	0.253651
GOTERM_BP_DIRECT	GO:0033574~response to testosterone	6	0.693642	0.0155711	P27797, P06744, P07996, P78330, P15531, Q13126	3.99334	0.270767
REACTOME_PATHWAY	R-HSA-379716:R-HSA-379716	6	0.693642	0.0195854	P49589, P49588, P26639, P12081, P41250, P23381	3.71926	0.130144
GOTERM_BP_DIRECT	GO:0061024~membrane organization	6	0.693642	0.0202764	P27348, P62258, Q04917, P31946, P61981, P63104	3.74376	0.323598
KEGG_PATHWAY	hsa04614:Renin-angiotensin system	6	0.693642	0.0220458	P10619, P48147, P52888, O75787, P15144, P42785	3.59624	0.132961
GOTERM_CC_DIRECT	GO:0008180~COP9 signalosome	6	0.693642	0.0232982	P80723, P08238, P11021, Q9BT78, P17066, P35579	3.62426	0.144565
GOTERM_BP_DIRECT	GO:0050919~negative chemotaxis	6	0.693642	0.0258248	P06756, O60462, P61586, O75326, Q13214, Q14563	3.52354	0.382952
REACTOME_PATHWAY	R-HSA-389960:R-HSA-389960	6	0.693642	0.0315418	P48643, Q9BQE3, P50990, P68363, Q13885, P50991	3.30601	0.192143
GOTERM_BP_DIRECT	GO:0007017~microtubule-based process	6	0.693642	0.0322588	P07437, Q96FJ2, Q9BQE3, P68363, Q13885, P43034	3.32778	0.443268
GOTERM_CC_DIRECT	GO:0031252~cell leading edge	6	0.693642	0.0354508	P46940, O15144, Q14203, P08670, P43034, P35579	3.25254	0.197594
GOTERM_CC_DIRECT	GO:0071944~cell periphery	6	0.693642	0.0354508	P15311, P35241, P14543, P26038, P02533, P61586	3.25254	0.197594
GOTERM_BP_DIRECT	GO:0001568~blood vessel development	6	0.693642	0.0396104	P06756, P20908, Q9H6X2, A0A087WXW9, P02452, Q16363, I3L3H7, P08123	3.15264	0.501337
GOTERM_BP_DIRECT	GO:0042157~lipoprotein metabolic process	6	0.693642	0.0396104	Q07954, P02649, P13497, P02768, P98160, Q8NBP7	3.15264	0.501337
KEGG_PATHWAY	hsa00630:Glyoxylate and dicarboxylate metabolism	6	0.693642	0.0417328	P40925, P40926, Q9BWD1, Q99798, P09622, P21399	3.06346	0.215344
REACTOME_PATHWAY	R-HSA-5336415:R-HSA-5336415	5	0.578035	0.000270148	P07900, P08238, P13639, P21926, Q16881	12.3975	0.00289524
GOTERM_CC_DIRECT	GO:0031232~extrinsic component of external side of plasma membrane	5	0.578035	0.00029729	P02787, P04083, P07093, P15289, Q8NBP7	13.2135	0.00332461
GOTERM_BP_DIRECT	GO:0071711~basement membrane organization	5	0.578035	0.000370182	P24347, Q14112, P14543, Q14118, P02462	12.4792	0.0137987
GOTERM_BP_DIRECT	GO:0006517~protein deglycosylation	5	0.578035	0.00102448	O00754, Q16706, P20933, Q9Y2E5, Q99497	9.98335	0.0323824
GOTERM_BP_DIRECT	GO:0051639~actin filament network formation	5	0.578035	0.00102448	P12814, Q14651, O15511, P13797, P13796	9.98335	0.0323824
GOTERM_BP_DIRECT	GO:0051764~actin crosslink formation	5	0.578035	0.00154642	P12814, Q14651, P21333, P13797, P13796	9.07578	0.0463155
GOTERM_BP_DIRECT	GO:0007016~cytoskeletal anchoring at plasma membrane	5	0.578035	0.00154642	P15311, Q9Y490, Q9Y4G6, O75369, Q14118	9.07578	0.0463155
REACTOME_PATHWAY	R-HSA-71336:R-HSA-71336	5	0.578035	0.00192728	P37837, O95336, Q96G03, P52209, K7EM49, P29401	8.26503	0.0171887
GOTERM_BP_DIRECT	GO:0048846~axon extension involved in axon guidance	5	0.578035	0.00222834	O60462, Q13740, Q99645, Q14563, O14786	8.31946	0.0627365
GOTERM_BP_DIRECT	GO:0019430~removal of superoxide radicals	5	0.578035	0.00222834	P08294, P00441, P04179, P32119, Q06830	8.31946	0.0627365
GOTERM_BP_DIRECT	GO:0006107~oxaloacetate metabolic process	5	0.578035	0.00222834	P40925, P40926, P17174, P53396, P00505	8.31946	0.0627365
GOTERM_BP_DIRECT	GO:0030195~negative regulation of blood coagulation	5	0.578035	0.00222834	P02649, P05121, P04004, P07093, P07225	8.31946	0.0627365
GOTERM_BP_DIRECT	GO:0010952~positive regulation of peptidase activity	5	0.578035	0.00309226	P02751, Q15113, P23142, P05067, P50281	7.6795	0.0806596
GOTERM_BP_DIRECT	GO:1900025~negative regulation of substrate adhesion-dependent cell spreading	5	0.578035	0.00309226	Q9ULV4, P32455, Q15063, P23142, O43707	7.6795	0.0806596
GOTERM_CC_DIRECT	GO:0031091~platelet alpha granule	5	0.578035	0.0033857	P35442, P05154, P09486, P07093, P07996	7.55055	0.0294037
GOTERM_BP_DIRECT	GO:0070208~protein heterotrimerization	5	0.578035	0.0041594	P62873, P12110, P12109, P02452, I3L3H7, P08123	7.13097	0.101553
GOTERM_BP_DIRECT	GO:0014912~negative regulation of smooth muscle cell migration	5	0.578035	0.0041594	P27695, Q07954, P05121, P24593, P17936	7.13097	0.101553
GOTERM_BP_DIRECT	GO:0032461~positive regulation of protein oligomerization	5	0.578035	0.0041594	Q07812, P08254, P55957, P14735, P03956	7.13097	0.101553
REACTOME_PATHWAY	R-HSA-2243919:R-HSA-2243919	5	0.578035	0.00452987	P13497, P02452, Q15113, I3L3H7, P08123, Q9Y4K0	6.7623	0.0372465
REACTOME_PATHWAY	R-HSA-446107:R-HSA-446107	5	0.578035	0.00452987	P48509, Q15149, P13647, P02533, P23229	6.7623	0.0372465
REACTOME_PATHWAY	R-HSA-446353:R-HSA-446353	5	0.578035	0.00643821	Q14315, Q9NVD7, P60709, P21333, Q96AC1	6.19877	0.0502918
REACTOME_PATHWAY	R-HSA-3371511:R-HSA-3371511	5	0.578035	0.00643821	P68104, P07900, P08238, P62258, P55072	6.19877	0.0502918
GOTERM_BP_DIRECT	GO:0061028~establishment of endothelial barrier	5	0.578035	0.00698267	P15311, P35241, P05362, P26038, P61224	6.2396	0.149054
GOTERM_BP_DIRECT	GO:0050860~negative regulation of T cell receptor signaling pathway	5	0.578035	0.00877512	P15311, P04156, P32455, P17931, P04216	5.87256	0.176073
GOTERM_BP_DIRECT	GO:0036120~cellular response to platelet-derived growth factor stimulus	5	0.578035	0.0108432	P46940, P35241, Q9GZP0, P09619, P21246	5.54631	0.207004
GOTERM_BP_DIRECT	GO:0007597~blood coagulation, intrinsic pathway	5	0.578035	0.0108432	P00742, P05155, Q07021, P42785, P01023	5.54631	0.207004
GOTERM_CC_DIRECT	GO:0042571~immunoglobulin complex, circulating	5	0.578035	0.0108643	P01834, P01861, P01857, P01859, P0DOY2	5.56356	0.0797177
GOTERM_BP_DIRECT	GO:0050771~negative regulation of axonogenesis	5	0.578035	0.0132012	P61586, P52565, P31150, Q9NQC3, P04216	5.2544	0.242257
GOTERM_BP_DIRECT	GO:0046716~muscle cell cellular homeostasis	5	0.578035	0.0132012	P13473, Q9Y281, P10253, P00441, P04075	5.2544	0.242257
GOTERM_MF_DIRECT	GO:0031995~insulin-like growth factor II binding	5	0.578035	0.000369433	P22692, P24592, P11717, P24593, P17936	12.4859	0.00740769
GOTERM_MF_DIRECT	GO:0016504~peptidase activator activity	5	0.578035	0.00102245	P02751, Q15113, P23142, P05067, P50281	9.98876	0.0175399
GOTERM_MF_DIRECT	GO:0050750~low-density lipoprotein particle receptor binding	5	0.578035	0.0069697	P02649, P14625, Q14696, Q96CW1, Q8NBP7	6.24297	0.0938196
GOTERM_MF_DIRECT	GO:0050431~transforming growth factor beta binding	5	0.578035	0.0069697	P06756, P17813, P07996, Q6YHK3, Q6EMK4	6.24297	0.0938196
REACTOME_PATHWAY	R-HSA-2214320:R-HSA-2214320	5	0.578035	0.0151155	P13497, P08572, P02452, I3L3H7, P08123, P02462	4.95902	0.105728
GOTERM_MF_DIRECT	GO:0016209~antioxidant activity	5	0.578035	0.0158336	P02649, P30044, P02768, P32119, Q06830	4.99438	0.174621
GOTERM_MF_DIRECT	GO:0005537~mannose binding	5	0.578035	0.0158336	A0A0A0MRU5, O00754, Q12907, P11717, O00462	4.99438	0.174621
GOTERM_MF_DIRECT	GO:0004601~peroxidase activity	5	0.578035	0.0220943	P69905, P30044, Q9BRA2, Q92626, Q06830	4.54034	0.228306
GOTERM_MF_DIRECT	GO:0001530~lipopolysaccharide binding	5	0.578035	0.0220943	P25786, P28070, P10809, P09429, Q9BUD6	4.54034	0.228306
GOTERM_BP_DIRECT	GO:0005980~glycogen catabolic process	5	0.578035	0.0188359	P0DP23, P36871, P10253, Q96G03, P46976	4.75398	0.308751
GOTERM_BP_DIRECT	GO:0048025~negative regulation of mRNA splicing, via spliceosome	5	0.578035	0.0188359	P26599, P22626, Q07021, P61978, P38159	4.75398	0.308751
GOTERM_BP_DIRECT	GO:0045861~negative regulation of proteolysis	5	0.578035	0.0188359	P04080, P00750, P07093, P14735, P01034	4.75398	0.308751
REACTOME_PATHWAY	R-HSA-399954:R-HSA-399954	5	0.578035	0.019107	P07900, P08238, P23528, Q14563, O14786	4.64908	0.128322
GOTERM_MF_DIRECT	GO:0019838~growth factor binding	5	0.578035	0.0435921	O60462, G5EA09, O00560, P01023, O14786, Q14767	3.69954	0.355621
GOTERM_MF_DIRECT	GO:0004181~metallocarboxypeptidase activity	5	0.578035	0.0435921	Q9UI42, Q8IUX7, P16870, P12955, Q66K79	3.69954	0.355621
GOTERM_BP_DIRECT	GO:0008037~cell recognition	5	0.578035	0.0221327	O15230, Q92692, K7EKE8, Q8NFZ8, P15151, P13611	4.53789	0.346057
GOTERM_BP_DIRECT	GO:0034394~protein localization to cell surface	5	0.578035	0.0221327	Q15262, P18206, Q14696, Q9UBX5, P21333, Q5TG12	4.53789	0.346057
GOTERM_BP_DIRECT	GO:0006509~membrane protein ectodomain proteolysis	5	0.578035	0.0221327	Q9NZ08, O14672, Q14118, P35579, P38159	4.53789	0.346057
BIOCARTA	h_mhcPathway:Antigen Processing and Presentation	5	0.578035	0.0242923	P61769, P28072, P16190, P28062, P30455, P18462, P28065, P16188	4.14964	0.322521
GOTERM_BP_DIRECT	GO:0001836~release of cytochrome c from mitochondria	5	0.578035	0.0257597	O75223, Q07812, P04179, P10909, P55957	4.34059	0.383841
REACTOME_PATHWAY	R-HSA-1566948:R-HSA-1566948	5	0.578035	0.0288869	P06756, P05556, Q9UBX5, P35555, Q9Y4K0	4.13251	0.181858
REACTOME_PATHWAY	R-HSA-70268:R-HSA-70268	5	0.578035	0.0288869	P00338, Q04760, P07195, P09622, Q9BYZ2	4.13251	0.181858
GOTERM_BP_DIRECT	GO:0071353~cellular response to interleukin-4	5	0.578035	0.0297229	P08238, P05388, P49327, P68363, P11021	4.15973	0.42173
GOTERM_BP_DIRECT	GO:0048870~cell motility	5	0.578035	0.0297229	P29317, Q16658, P17813, P50281, Q14247	4.15973	0.42173
GOTERM_CC_DIRECT	GO:0030134~ER to Golgi transport vesicle	5	0.578035	0.0323077	Q12907, Q9UBR2, P05067, P53634, Q8NBP7	4.06568	0.186517
GOTERM_BP_DIRECT	GO:0007159~leukocyte cell-cell adhesion	5	0.578035	0.0340264	P15311, P05556, P21589, P05362, P26038	3.99334	0.457616
GOTERM_CC_DIRECT	GO:0031226~intrinsic component of plasma membrane	5	0.578035	0.0411056	P21980, P09619, P16234, Q13740, P08962	3.77527	0.222002
GOTERM_CC_DIRECT	GO:0030016~myofibril	5	0.578035	0.0411056	P09493, H7BYY1, Q05682, Q6IBS0, P60900, C9J813, Q12792, Q6ZN40	3.77527	0.222002
REACTOME_PATHWAY	R-HSA-194223:R-HSA-194223	5	0.578035	0.0411518	P02649, P13497, P02768, P55058, P01023	3.71926	0.236445
GOTERM_CC_DIRECT	GO:0071556~integral component of lumenal side of endoplasmic reticulum membrane	5	0.578035	0.0459635	P27824, P16190, P30479, P30504, P27797, P30455, P18462, P16188, P30475	3.64509	0.243234
GOTERM_CC_DIRECT	GO:0030687~preribosome, large subunit precursor	5	0.578035	0.0459635	P05387, H0YDD8, Q8NHW5, P05386, P05388, P56537	3.64509	0.243234
GOTERM_BP_DIRECT	GO:0090200~positive regulation of release of cytochrome c from mitochondria	5	0.578035	0.0489981	O14737, Q07812, Q9ULZ3, P55957, Q03405	3.56548	0.567855
GOTERM_BP_DIRECT	GO:0043388~positive regulation of DNA binding	5	0.578035	0.0489981	P0DP23, P10599, P09429, Q03405, P15531	3.56548	0.567855
GOTERM_BP_DIRECT	GO:0051881~regulation of mitochondrial membrane potential	5	0.578035	0.0489981	O00299, Q07812, P00441, P04179, Q99497	3.56548	0.567855
GOTERM_CC_DIRECT	GO:0036021~endolysosome lumen	4	0.462428	0.000405583	P43235, P07858, P07711, P25774	21.1415	0.00437444
GOTERM_CC_DIRECT	GO:0005862~muscle thin filament tropomyosin	4	0.462428	0.000405583	K7ENT6, P09493, H7BYY1, P06753, P07951, P67936, Q5TCU3, Q6ZN40, D6R904	21.1415	0.00437444
REACTOME_PATHWAY	R-HSA-901042:R-HSA-901042	4	0.462428	0.00271487	P30101, P27824, P14314, P27797	11.9016	0.0232748
GOTERM_CC_DIRECT	GO:0016528~sarcoplasm	4	0.462428	0.00318767	Q14315, Q15149, P06396, Q08629	12.0809	0.0281011
GOTERM_CC_DIRECT	GO:0016460~myosin II complex	4	0.462428	0.00318767	P19105, P35580, Q7Z406, P35579	12.0809	0.0281011
GOTERM_BP_DIRECT	GO:0048251~elastic fiber assembly	4	0.462428	0.00375131	P22105, Q9UBX5, P35749, P55083	11.4095	0.0941142
GOTERM_BP_DIRECT	GO:2000427~positive regulation of apoptotic cell clearance	4	0.462428	0.00375131	P01024, Q08431, P0C0L5, P06681	11.4095	0.0941142
GOTERM_BP_DIRECT	GO:0019885~antigen processing and presentation of endogenous peptide antigen via MHC class I	4	0.462428	0.00375131	P61769, P16190, P30455, Q9NZ08, P18462, Q6P179, P16188	11.4095	0.0941142
REACTOME_PATHWAY	R-HSA-156842:R-HSA-156842	4	0.462428	0.00515958	P68104, P26641, P29692, P24534	9.91803	0.0418501
REACTOME_PATHWAY	R-HSA-3000484:R-HSA-3000484	4	0.462428	0.00515958	P07900, P27797, Q9Y4L1, Q92598	9.91803	0.0418501
GOTERM_BP_DIRECT	GO:0006108~malate metabolic process	4	0.462428	0.00577999	P40925, P40926, P07954, P48163	9.98335	0.12746
GOTERM_CC_DIRECT	GO:0008290~F-actin capping protein complex	4	0.462428	0.00712528	P52907, P47755, P47756, P58546	9.39624	0.0563113
GOTERM_BP_DIRECT	GO:0035988~chondrocyte proliferation	4	0.462428	0.00835	P52823, Q16832, P29279, P50281	8.87409	0.171352
GOTERM_BP_DIRECT	GO:0002480~antigen processing and presentation of exogenous peptide antigen via MHC class I, TAP-independent	4	0.462428	0.00835	P61769, P16190, P30479, P30504, P30455, P18462, P16188, P30475	8.87409	0.171352
GOTERM_BP_DIRECT	GO:0044342~type B pancreatic cell proliferation	4	0.462428	0.00835	P22692, P48745, P24593, P17936	8.87409	0.171352
GOTERM_CC_DIRECT	GO:0005916~fascia adherens	4	0.462428	0.00982476	P12814, P18206, P19022, P17661	8.45661	0.0732067
GOTERM_BP_DIRECT	GO:0031115~negative regulation of microtubule polymerization	4	0.462428	0.0114895	P16949, P47756, Q02790, Q15691	7.98668	0.216736
GOTERM_BP_DIRECT	GO:0010737~protein kinase A signaling	4	0.462428	0.0114895	P15311, P35241, P35555, P13796	7.98668	0.216736
GOTERM_BP_DIRECT	GO:0051085~chaperone mediated protein folding requiring cofactor	4	0.462428	0.0114895	P61604, P11142, P10809, Q92598	7.98668	0.216736
GOTERM_CC_DIRECT	GO:0042612~MHC class I protein complex	4	0.462428	0.0130402	P61769, P16190, P30479, P30504, P30455, P18462, P16188, P30475	7.68783	0.0897339
REACTOME_PATHWAY	R-HSA-3595177:R-HSA-3595177	4	0.462428	0.0130523	P07585, P21810, Q6UVK1, P13611	7.43852	0.0946519
REACTOME_PATHWAY	R-HSA-3595172:R-HSA-3595172	4	0.462428	0.0130523	P07585, P21810, Q6UVK1, P13611	7.43852	0.0946519
REACTOME_PATHWAY	R-HSA-174577:R-HSA-174577	4	0.462428	0.0130523	P00751, P01024, P0C0L5, P06681	7.43852	0.0946519
REACTOME_PATHWAY	R-HSA-3595174:R-HSA-3595174	4	0.462428	0.0130523	P07585, P21810, Q6UVK1, P13611	7.43852	0.0946519
GOTERM_BP_DIRECT	GO:1903364~positive regulation of cellular protein catabolic process	4	0.462428	0.0152182	Q96QK1, P15311, P35241, P26038	7.26062	0.266861
GOTERM_BP_DIRECT	GO:0033690~positive regulation of osteoblast proliferation	4	0.462428	0.0152182	P02788, P06756, Q96CG8, O00622	7.26062	0.266861
GOTERM_BP_DIRECT	GO:0021680~cerebellar Purkinje cell layer development	4	0.462428	0.0152182	P35580, P54802, P49588, P11021	7.26062	0.266861
GOTERM_CC_DIRECT	GO:0036020~endolysosome membrane	4	0.462428	0.016785	Q00610, O95782, P63010, Q96CW1	7.04718	0.109399
GOTERM_CC_DIRECT	GO:0042641~actomyosin	4	0.462428	0.016785	P35580, Q7Z406, Q16643, P35579	7.04718	0.109399
GOTERM_BP_DIRECT	GO:0030208~dermatan sulfate biosynthetic process	4	0.462428	0.0195481	P07585, P21810, Q6UVK1, P13611	6.65557	0.316918
GOTERM_BP_DIRECT	GO:0097067~cellular response to thyroid hormone stimulus	4	0.462428	0.0195481	P35241, P07858, P07711, P25774	6.65557	0.316918
GOTERM_BP_DIRECT	GO:0055003~cardiac myofibril assembly	4	0.462428	0.0195481	P35580, P09619, P16234, P68032	6.65557	0.316918
GOTERM_BP_DIRECT	GO:0034329~cell junction assembly	4	0.462428	0.0195481	Q14315, P60709, P21333, Q96AC1	6.65557	0.316918
GOTERM_BP_DIRECT	GO:0044319~wound healing, spreading of cells	4	0.462428	0.0195481	P61586, P21333, O00622, P13796	6.65557	0.316918
BIOCARTA	h_slrpPathway:Small Leucine-rich Proteoglycan (SLRP) molecules	4	0.462428	0.0198211	P07585, P51884, P21810, Q99645	6.08614	0.316401
GOTERM_CC_DIRECT	GO:0070971~endoplasmic reticulum exit site	4	0.462428	0.021067	Q9P0L0, P16190, Q8WUM4, P30455, P18462, Q5JRA6, P16188	6.50509	0.134226
GOTERM_CC_DIRECT	GO:0031092~platelet alpha granule membrane	4	0.462428	0.021067	Q06481, P21926, P09486, O60245	6.50509	0.134226
GOTERM_MF_DIRECT	GO:0038085~vascular endothelial growth factor binding	4	0.462428	0.00115432	P09619, P16234, P21246, O14786	15.982	0.0194432
GOTERM_MF_DIRECT	GO:0015923~mannosidase activity	4	0.462428	0.0022228	O00754, Q16706, Q9Y2E5, P33908	13.3183	0.0347702
GOTERM_MF_DIRECT	GO:0051920~peroxiredoxin activity	4	0.462428	0.0022228	P30041, P30044, Q99497, Q06830	13.3183	0.0347702
GOTERM_MF_DIRECT	GO:0070180~large ribosomal subunit rRNA binding	4	0.462428	0.00374565	P05387, H0YDD8, Q8NHW5, P05386, P05388	11.4157	0.0561752
GOTERM_MF_DIRECT	GO:0004559~alpha-mannosidase activity	4	0.462428	0.00833772	O00754, Q9UKM7, Q16706, Q9Y2E5	8.8789	0.102933
GOTERM_MF_DIRECT	GO:0001849~complement component C1q binding	4	0.462428	0.00833772	P26022, P27797, Q07021, P0C0L5	8.8789	0.102933
GOTERM_MF_DIRECT	GO:0004859~phospholipase inhibitor activity	4	0.462428	0.0151964	P07355, P04083, A6NMY6, P08758	7.26455	0.170061
GOTERM_BP_DIRECT	GO:0006518~peptide metabolic process	4	0.462428	0.0244849	Q8IUX7, P52888, P19021, Q66K79	6.1436	0.370327
GOTERM_BP_DIRECT	GO:0045995~regulation of embryonic development	4	0.462428	0.0244849	O15230, Q16363, P25391, P24043	6.1436	0.370327
GOTERM_BP_DIRECT	GO:0032516~positive regulation of phosphoprotein phosphatase activity	4	0.462428	0.0244849	P0DP23, P08238, P09619, Q15257	6.1436	0.370327
GOTERM_BP_DIRECT	GO:0051131~chaperone-mediated protein complex assembly	4	0.462428	0.0244849	P07900, P34932, P10809, P10909	6.1436	0.370327
GOTERM_BP_DIRECT	GO:0006957~complement activation, alternative pathway	4	0.462428	0.0244849	P00751, P08603, P01024, P00746	6.1436	0.370327
REACTOME_PATHWAY	R-HSA-390450:R-HSA-390450	4	0.462428	0.0252886	P48643, P60709, P50990, P50991	5.95082	0.162287
GOTERM_MF_DIRECT	GO:0042623~ATPase activity, coupled	4	0.462428	0.0195205	P0DMV9, P11142, P50990, P17066	6.65917	0.206578
GOTERM_MF_DIRECT	GO:0030898~actin-dependent ATPase activity	4	0.462428	0.0244508	P35580, Q7Z406, P60660, P35579	6.14693	0.244634
GOTERM_CC_DIRECT	GO:0030126~COPI vesicle coat	4	0.462428	0.0258892	P53621, Q9Y678, P48444, O14579	6.04044	0.15793
GOTERM_MF_DIRECT	GO:0030169~low-density lipoprotein particle binding	4	0.462428	0.0361237	P55290, P01130, P07996, Q8NBP7	5.32734	0.312018
GOTERM_BP_DIRECT	GO:0009142~nucleoside triphosphate biosynthetic process	4	0.462428	0.0300282	P00568, P30085, O60361, P15531	5.70477	0.423302
GOTERM_BP_DIRECT	GO:0090303~positive regulation of wound healing	4	0.462428	0.0300282	P04083, Q15746, P04004, P09429	5.70477	0.423302
GOTERM_MF_DIRECT	GO:0005161~platelet-derived growth factor receptor binding	4	0.462428	0.0361237	Q9GZP0, P09619, P16234, Q9NRA1	5.32734	0.312018
REACTOME_PATHWAY	R-HSA-2022923:R-HSA-2022923	4	0.462428	0.0330731	P07585, P21810, Q6UVK1, P13611	5.40984	0.197348
REACTOME_PATHWAY	R-HSA-196025:R-HSA-196025	4	0.462428	0.0330731	P60709, Q00610, P53675, Q96CW1	5.40984	0.197348
REACTOME_PATHWAY	R-HSA-373760:R-HSA-373760	4	0.462428	0.0330731	P07942, Q13740, P11047, P25391	5.40984	0.197348
GOTERM_BP_DIRECT	GO:0043403~skeletal muscle tissue regeneration	4	0.462428	0.0361727	P13929, E9PAV3, P14618, P58546	5.32446	0.473191
REACTOME_PATHWAY	R-HSA-190873:R-HSA-190873	4	0.462428	0.0419514	P60709, Q00610, P53675, Q96CW1	4.95902	0.238672
REACTOME_PATHWAY	R-HSA-203615:R-HSA-203615	4	0.462428	0.0419514	P0DP23, O94760, O95865, P07900	4.95902	0.238672
REACTOME_PATHWAY	R-HSA-264870:R-HSA-264870	4	0.462428	0.0419514	Q15149, P06396, P08670, Q13813	4.95902	0.238672
REACTOME_PATHWAY	R-HSA-844456:R-HSA-844456	4	0.462428	0.0419514	P08238, P10599, Q9ULZ3, P05067	4.95902	0.238672
GOTERM_BP_DIRECT	GO:0010592~positive regulation of lamellipodium assembly	4	0.462428	0.0429089	P07900, O15144, Q16658, Q6IBS0	4.99168	0.526382
GOTERM_BP_DIRECT	GO:0045109~intermediate filament organization	4	0.462428	0.0429089	P08670, P35527, P35908, P17661	4.99168	0.526382
GOTERM_BP_DIRECT	GO:0006750~glutathione biosynthetic process	4	0.462428	0.0429089	O75223, P48637, Q96KP4, P48506	4.99168	0.526382
GOTERM_BP_DIRECT	GO:1903506~regulation of nucleic acid-templated transcription	4	0.462428	0.0429089	P12814, Q15643, O43707, P35609	4.99168	0.526382
GOTERM_CC_DIRECT	GO:0097513~myosin II filament	3	0.346821	0.00647875	P35580, Q7Z406, P35579	21.1415	0.052669
GOTERM_CC_DIRECT	GO:0030135~coated vesicle	3	0.346821	0.00647875	P10809, P35475, P53675	21.1415	0.052669
GOTERM_CC_DIRECT	GO:0005589~collagen type VI trimer	3	0.346821	0.00647875	P07585, P12111, P12109	21.1415	0.052669
GOTERM_CC_DIRECT	GO:0005606~laminin-1 complex	3	0.346821	0.00647875	P07942, P11047, P25391	21.1415	0.052669
GOTERM_CC_DIRECT	GO:0043259~laminin-10 complex	3	0.346821	0.00647875	O15230, P07942, P11047	21.1415	0.052669
GOTERM_CC_DIRECT	GO:0043260~laminin-11 complex	3	0.346821	0.00647875	O15230, P11047, P55268	21.1415	0.052669
GOTERM_BP_DIRECT	GO:0021828~gonadotrophin-releasing hormone neuronal migration to the hypothalamus	3	0.346821	0.00724915	O60462, Q14563, O14786	19.9667	0.152368
GOTERM_BP_DIRECT	GO:0002486~antigen processing and presentation of endogenous peptide antigen via MHC class I via ER pathway, TAP-independent	3	0.346821	0.00724915	P16190, P30479, P30504, P30455, P18462, P16188, P30475	19.9667	0.152368
GOTERM_BP_DIRECT	GO:0061684~chaperone-mediated autophagy	3	0.346821	0.00724915	P07900, P11142, P13473	19.9667	0.152368
GOTERM_BP_DIRECT	GO:1903375~facioacoustic ganglion development	3	0.346821	0.00724915	O60462, Q14563, O14786	19.9667	0.152368
GOTERM_CC_DIRECT	GO:0005638~lamin filament	3	0.346821	0.0125519	Q03252, P02545, P20700	15.8561	0.089486
GOTERM_CC_DIRECT	GO:0030478~actin cap	3	0.346821	0.0125519	P61160, P06396, Q05682, C9J813	15.8561	0.089486
GOTERM_CC_DIRECT	GO:0005853~eukaryotic translation elongation factor 1 complex	3	0.346821	0.0125519	P68104, P29692, P24534	15.8561	0.089486
GOTERM_CC_DIRECT	GO:0071953~elastic fiber	3	0.346821	0.0125519	Q9UBX5, P23142, P55083	15.8561	0.089486
GOTERM_BP_DIRECT	GO:0048549~positive regulation of pinocytosis	3	0.346821	0.0140179	P50897, P30530, O43707	14.975	0.251191
GOTERM_BP_DIRECT	GO:1902115~regulation of organelle assembly	3	0.346821	0.0140179	P15311, P35241, P26038	14.975	0.251191
GOTERM_BP_DIRECT	GO:1902285~semaphorin-plexin signaling pathway involved in neuron projection guidance	3	0.346821	0.0140179	O60462, Q14563, O14786	14.975	0.251191
GOTERM_BP_DIRECT	GO:0097491~sympathetic neuron projection guidance	3	0.346821	0.0140179	O60462, Q14563, O14786	14.975	0.251191
GOTERM_BP_DIRECT	GO:0097490~sympathetic neuron projection extension	3	0.346821	0.0140179	O60462, Q14563, O14786	14.975	0.251191
GOTERM_BP_DIRECT	GO:0036486~ventral trunk neural crest cell migration	3	0.346821	0.0140179	O60462, Q14563, O14786	14.975	0.251191
GOTERM_BP_DIRECT	GO:1903553~positive regulation of extracellular exosome assembly	3	0.346821	0.0140179	G5EA09, Q8WUM4, P31431, O00560	14.975	0.251191
GOTERM_BP_DIRECT	GO:0070370~cellular heat acclimation	3	0.346821	0.0140179	P0DMV9, Q16576, P17066	14.975	0.251191
GOTERM_BP_DIRECT	GO:0010757~negative regulation of plasminogen activation	3	0.346821	0.0225925	P05121, P07093, P07996	11.98	0.350278
GOTERM_BP_DIRECT	GO:1902966~positive regulation of protein localization to early endosome	3	0.346821	0.0225925	P15311, P35241, P26038	11.98	0.350278
GOTERM_BP_DIRECT	GO:0022614~membrane to membrane docking	3	0.346821	0.0225925	P15311, P05362, P26038	11.98	0.350278
GOTERM_BP_DIRECT	GO:0033591~response to L-ascorbic acid	3	0.346821	0.0225925	P09211, P04179, P09486	11.98	0.350278
GOTERM_BP_DIRECT	GO:0043456~regulation of pentose-phosphate shunt	3	0.346821	0.0225925	Q8N0Y7, P18669, P15259	11.98	0.350278
GOTERM_BP_DIRECT	GO:1901166~neural crest cell migration involved in autonomic nervous system development	3	0.346821	0.0225925	O60462, Q14563, O14786	11.98	0.350278
GOTERM_BP_DIRECT	GO:0061551~trigeminal ganglion development	3	0.346821	0.0225925	O60462, Q14563, O14786	11.98	0.350278
GOTERM_BP_DIRECT	GO:0019941~modification-dependent protein catabolic process	3	0.346821	0.0225925	O14933, P22314, P05161	11.98	0.350278
GOTERM_BP_DIRECT	GO:0016139~glycoside catabolic process	3	0.346821	0.0225925	P17050, Q9BTY2, P04066	11.98	0.350278
GOTERM_BP_DIRECT	GO:0006532~aspartate biosynthetic process	3	0.346821	0.0225925	P17174, P00505, P54687	11.98	0.350278
GOTERM_BP_DIRECT	GO:0017038~protein import	3	0.346821	0.0225925	P02649, P13473, P10909	11.98	0.350278
GOTERM_CC_DIRECT	GO:0000015~phosphopyruvate hydratase complex	3	0.346821	0.0294577	P13929, P06733, P09104	10.5708	0.176243
GOTERM_CC_DIRECT	GO:0030130~clathrin coat of trans-Golgi network vesicle	3	0.346821	0.0294577	Q00610, O95782, P53675	10.5708	0.176243
GOTERM_MF_DIRECT	GO:0046977~TAP binding	3	0.346821	0.00724156	P16190, P30479, P30504, P30455, P18462, P16188, P30475	19.9775	0.0947371
GOTERM_MF_DIRECT	GO:0008242~omega peptidase activity	3	0.346821	0.00724156	P09936, P13798, Q92820	19.9775	0.0947371
GOTERM_MF_DIRECT	GO:0016668~oxidoreductase activity, acting on a sulfur group of donors, NAD(P) as acceptor	3	0.346821	0.0140035	P00390, Q16881, P09622	14.9831	0.159546
GOTERM_MF_DIRECT	GO:0046538~2,3-bisphosphoglycerate-dependent phosphoglycerate mutase activity	3	0.346821	0.0140035	Q8N0Y7, P18669, P15259	14.9831	0.159546
GOTERM_BP_DIRECT	GO:0032964~collagen biosynthetic process	3	0.346821	0.0327756	P20908, A0A087WXW9, P02452, P50454, I3L3H7	9.98335	0.446806
GOTERM_BP_DIRECT	GO:1990000~amyloid fibril formation	3	0.346821	0.0327756	P06396, P62942, P05067	9.98335	0.446806
GOTERM_BP_DIRECT	GO:0043535~regulation of blood vessel endothelial cell migration	3	0.346821	0.0327756	Q9H299, P29317, P42785	9.98335	0.446806
GOTERM_BP_DIRECT	GO:0032914~positive regulation of transforming growth factor beta1 production	3	0.346821	0.0327756	P51884, O75787, P07996	9.98335	0.446806
GOTERM_BP_DIRECT	GO:2001200~positive regulation of dendritic cell differentiation	3	0.346821	0.0327756	P09382, P17931, P09429	9.98335	0.446806
GOTERM_BP_DIRECT	GO:0044794~positive regulation by host of viral process	3	0.346821	0.0327756	P02649, P23284, P23528	9.98335	0.446806
GOTERM_BP_DIRECT	GO:0006531~aspartate metabolic process	3	0.346821	0.0327756	P17174, P30520, P00505	9.98335	0.446806
GOTERM_BP_DIRECT	GO:0007044~cell-substrate junction assembly	3	0.346821	0.0327756	P02751, Q9Y490, P23229	9.98335	0.446806
GOTERM_BP_DIRECT	GO:0038063~collagen-activated tyrosine kinase receptor signaling pathway	3	0.346821	0.0327756	P08572, Q16832, P02462	9.98335	0.446806
GOTERM_BP_DIRECT	GO:0001957~intramembranous ossification	3	0.346821	0.0327756	P43235, P08253, P02452, I3L3H7	9.98335	0.446806
GOTERM_MF_DIRECT	GO:0032564~dATP binding	3	0.346821	0.0140035	P07900, P08238, P50502	14.9831	0.159546
GOTERM_MF_DIRECT	GO:0004082~bisphosphoglycerate mutase activity	3	0.346821	0.0140035	Q8N0Y7, P18669, P15259	14.9831	0.159546
GOTERM_MF_DIRECT	GO:0004619~phosphoglycerate mutase activity	3	0.346821	0.0140035	Q8N0Y7, P18669, P15259	14.9831	0.159546
GOTERM_MF_DIRECT	GO:0004459~L-lactate dehydrogenase activity	3	0.346821	0.0225696	P00338, P07195, Q9BYZ2	11.9865	0.23028
GOTERM_MF_DIRECT	GO:0008379~thioredoxin peroxidase activity	3	0.346821	0.0225696	P30044, P32119, Q06830	11.9865	0.23028
GOTERM_MF_DIRECT	GO:0030023~extracellular matrix constituent conferring elasticity	3	0.346821	0.0225696	A0A0A0MT20, Q9Y6C2, P35555, P02462	11.9865	0.23028
REACTOME_PATHWAY	R-HSA-173736:R-HSA-173736	3	0.346821	0.0392447	P00751, P01024, P00746	8.92623	0.228431
GOTERM_CC_DIRECT	GO:0097433~dense body	3	0.346821	0.0399658	P02787, Q7KZF4, P60709	9.06066	0.218326
GOTERM_MF_DIRECT	GO:0004784~superoxide dismutase activity	3	0.346821	0.0225696	P08294, P00441, P04179	11.9865	0.23028
GOTERM_MF_DIRECT	GO:0004083~bisphosphoglycerate 2-phosphatase activity	3	0.346821	0.0225696	Q8N0Y7, P18669, P15259	11.9865	0.23028
GOTERM_MF_DIRECT	GO:1990226~histone methyltransferase binding	3	0.346821	0.0327431	P83916, P08238, Q13185	9.98876	0.297393
GOTERM_MF_DIRECT	GO:0004634~phosphopyruvate hydratase activity	3	0.346821	0.0327431	P13929, P06733, P09104	9.98876	0.297393
GOTERM_MF_DIRECT	GO:0047134~protein-disulfide reductase activity	3	0.346821	0.0327431	O43396, Q9BRA2, P10599	9.98876	0.297393
GOTERM_MF_DIRECT	GO:0019205~nucleobase-containing compound kinase activity	3	0.346821	0.044342	P54819, P00568, P30085	8.56179	0.357748
GOTERM_BP_DIRECT	GO:0032532~regulation of microvillus length	3	0.346821	0.0443854	Q14651, P15311, Q6IBS0	8.55716	0.533268
GOTERM_BP_DIRECT	GO:0043567~regulation of insulin-like growth factor receptor signaling pathway	3	0.346821	0.0443854	P22692, P24592, P17936	8.55716	0.533268
GOTERM_BP_DIRECT	GO:0019388~galactose catabolic process	3	0.346821	0.0443854	P16278, P36871, Q96G03	8.55716	0.533268
GOTERM_BP_DIRECT	GO:0006013~mannose metabolic process	3	0.346821	0.0443854	O00754, Q16706, Q9Y2E5	8.55716	0.533268
GOTERM_BP_DIRECT	GO:0006032~chitin catabolic process	3	0.346821	0.0443854	Q01459, Q9BWS9, P36222	8.55716	0.533268
GOTERM_BP_DIRECT	GO:0006734~NADH metabolic process	3	0.346821	0.0443854	P40925, P40926, P55072	8.55716	0.533268
GOTERM_BP_DIRECT	GO:0006101~citrate metabolic process	3	0.346821	0.0443854	P53396, Q99798, P21399	8.55716	0.533268
GOTERM_BP_DIRECT	GO:1903077~negative regulation of protein localization to plasma membrane	3	0.346821	0.0443854	P32455, Q00610, Q96CW1	8.55716	0.533268
GOTERM_BP_DIRECT	GO:0048771~tissue remodeling	3	0.346821	0.0443854	P38571, P50281, Q6UVK1	8.55716	0.533268
GOTERM_MF_DIRECT	GO:0004568~chitinase activity	3	0.346821	0.044342	Q01459, Q9BWS9, P36222	8.56179	0.357748
GOTERM_MF_DIRECT	GO:0005021~vascular endothelial growth factor-activated receptor activity	3	0.346821	0.044342	O60462, P16234, O14786	8.56179	0.357748
