# Supplementary material for: Unraveling the Molecular Signature of Extracellular Vesicles From Endometrial-Derived Mesenchymal Stem Cells: Potential Modulatory Effects and Therapeutic Applications
Source: Front Bioeng Biotechnol. 2019 Dec 20;7:431. doi: 10.3389/fbioe.2019.00431 (PMC6932983; doi:10.3389/fbioe.2019.00431)
Supplement: Supplementary file 6 [file Table_6.XLSX]

## Sheet: Supp-Table_6
Supplementary Table 6. Enrichment analysis proteins with significant changes in IFNγ/EV-endMSCs vs. EV-endMCS (n=84) using DAVID software. Different annotation databases as Gene Ontology (GO), KEEG, REACTOME or BIOCARTA were used. ‘Count’ means the number of proteins within the corresponding category annotation. The percentage represents the proportion of gene-coded proteins annotated within the …
Original database	Category	Count	%	p value	Proteins	Fold Enrichment	FDR Benjamini
GOTERM_CC_DIRECT	GO:0070062~extracellular exosome	55	66.2651	6.34177e-25	P21926, P30504, Q92626, Q99715, P23526, P61769, P28062, Q9Y696, Q9HCU0, P28065, P00736, P06681, P68036, Q8WVQ1, Q15113, P21333, Q9NZ08, O75368, H0Y789, O15230, P47755, P04179, Q15365, Q96CW1, P02751, P18206, P09871, A0A024RA52, P20618, Q14651, P50897, P00751, P30479, P06756, Q8NFZ8, P55072, P17066, Q02809, O75347, Q9Y617, A0A087WXW9, P35237, Q93063, P09603, P50395, Q9Y5Z4, P05155, Q9UNN8, O00584,…	4.29603	1.14152e-22
GOTERM_CC_DIRECT	GO:0005576~extracellular region	29	34.9398	1.50254e-10	P02751, P49746, P18206, P30504, P09871, Q99715, Q9ULZ3, P61769, P50897, P00751, P09486, Q03692, P25774, P00736, P06681, A0A087WXW9, Q9NZ08, P21333, P24347, H0Y789, P47755, O15230, P05155, Q9UNN8, P32455, O00584, P08253, P07339, Q9Y4L1	3.95492	1.35229e-08
GOTERM_CC_DIRECT	GO:0005615~extracellular space	23	27.7108	7.48513e-08	P02751, P21926, Q15113, Q9NZ08, Q92626, Q99715, P35237, O75368, Q8NBP7, P61769, H0Y789, P00751, P50897, P09603, P05155, O15230, O00584, P08253, P09486, P07339, P21246, P25774, P06681	3.74909	4.49107e-06
GOTERM_BP_DIRECT	GO:0002479~antigen processing and presentation of exogenous peptide antigen via MHC class I, TAP-dependent	8	9.63855	2.26429e-08	A0A024RA52, P20618, P61769, P28062, P30479, P06756, P30504, P28065	25.6906	1.57141e-05
GOTERM_CC_DIRECT	GO:0031012~extracellular matrix	11	13.253	8.37028e-07	P24347, P02751, O15230, P08253, A0A087WXW9, Q15113, P21333, Q92626, P07339, Q99715, Q00839	8.15956	3.76656e-05
GOTERM_BP_DIRECT	GO:0030574~collagen catabolic process	7	8.43373	6.73642e-07	P24347, P08253, A0A087WXW9, Q03692, P07339, Q99715, P25774	22.128	0.000233727
GOTERM_CC_DIRECT	GO:0005925~focal adhesion	11	13.253	9.9672e-06	P61769, P50395, P18206, P06756, P21926, Q9UNN8, O75954, P21333, Q13740, Q9Y4L1, P28838	6.17706	0.000358757
GOTERM_CC_DIRECT	GO:0005578~proteinaceous extracellular matrix	9	10.8434	2.74293e-05	P24347, P02751, H0Y789, P08253, A0A087WXW9, P09486, Q03692, Q92626, Q9HCU0	7.37349	0.000822553
GOTERM_CC_DIRECT	GO:0005829~cytosol	31	37.3494	6.1054e-05	P18206, P42224, Q9ULZ3, P23526, A0A024RA52, P20618, P14324, P50897, P28062, Q9Y696, P28065, P55072, P63279, P17066, P14902, Q9Y617, O14933, Q9NZ08, P21333, P48163, P35237, Q9Y4F1, P20810, P50395, P47755, P24844, P32455, Q10567, P24534, Q96CW1, P23381	2.05326	0.00156878
GOTERM_CC_DIRECT	GO:0005839~proteasome core complex	4	4.81928	0.000110143	A0A024RA52, P20618, P28062, P28065	41.8221	0.00247529
GOTERM_BP_DIRECT	GO:0002576~platelet degranulation	7	8.43373	1.10435e-05	P02751, H0Y789, P18206, P05155, P21926, P09486, P21333	13.7494	0.00255149
GOTERM_CC_DIRECT	GO:0000502~proteasome complex	5	6.0241	0.000153275	A0A024RA52, P20618, P28062, P28065, P55072	18.2972	0.00306105
GOTERM_CC_DIRECT	GO:0005788~endoplasmic reticulum lumen	7	8.43373	0.000227918	P61769, O00584, A0A087WXW9, Q03692, Q9NZ08, Q99715, Q9Y4L1	8.00502	0.00409459
GOTERM_CC_DIRECT	GO:0005783~endoplasmic reticulum	13	15.6627	0.000316659	Q02809, P30504, Q92626, Q9NZ08, Q9ULZ3, P20810, Q93063, Q8NBP7, P30479, P21246, Q9Y4L1, P24534, P55072	3.4473	0.00516911
GOTERM_CC_DIRECT	GO:0005604~basement membrane	5	6.0241	0.000442662	H0Y789, O15230, A0A087WXW9, P09486, P21246	13.8966	0.00661939
GOTERM_MF_DIRECT	GO:0004252~serine-type endopeptidase activity	9	10.8434	3.01752e-05	P24347, P00751, P08253, P09871, P07339, P25774, Q8NBP7, P06681, P00736	7.26585	0.00694634
GOTERM_CC_DIRECT	GO:0072562~blood microparticle	6	7.22892	0.000615219	P02751, P00751, P05155, P09871, P17066, P00736	8.66709	0.00848483
GOTERM_CC_DIRECT	GO:0005581~collagen trimer	5	6.0241	0.00078759	H0Y789, A0A087WXW9, Q15113, Q03692, Q99715	11.9329	0.010079
GOTERM_CC_DIRECT	GO:0042612~MHC class I protein complex	3	3.61446	0.00107141	P61769, P30479, P30504	59.8817	0.0127814
GOTERM_BP_DIRECT	GO:0051603~proteolysis involved in cellular protein catabolic process	5	6.0241	8.72702e-05	A0A024RA52, P20618, P28062, P28065, P25774	21.0743	0.015028
GOTERM_MF_DIRECT	GO:0004298~threonine-type endopeptidase activity	4	4.81928	0.000132996	A0A024RA52, P20618, P28062, P28065	39.2125	0.0152446
GOTERM_CC_DIRECT	GO:0031093~platelet alpha granule lumen	4	4.81928	0.0019462	P02751, H0Y789, P05155, P09486	15.9685	0.0216777
GOTERM_BP_DIRECT	GO:0002474~antigen processing and presentation of peptide antigen via MHC class I	4	4.81928	0.000414317	P61769, P30479, P30504, Q9NZ08	26.9751	0.0283499
GOTERM_BP_DIRECT	GO:0035987~endodermal cell differentiation	4	4.81928	0.000301659	P02751, P06756, P08253, Q99715	29.9723	0.0294689
GOTERM_BP_DIRECT	GO:0060333~interferon-gamma-mediated signaling pathway	5	6.0241	0.000400221	P61769, P30479, P42224, P30504, P32455	14.2474	0.0303961
GOTERM_CC_DIRECT	GO:0009986~cell surface	9	10.8434	0.00301005	P30479, P06756, Q9Y696, Q9UNN8, P30504, P09486, P21246, Q00839, Q8NBP7	3.64593	0.0314151
GOTERM_BP_DIRECT	GO:0033209~tumor necrosis factor-mediated signaling pathway	6	7.22892	0.000278946	A0A024RA52, P20618, P28062, P42224, Q9ULZ3, P28065	10.2871	0.0317542
GOTERM_BP_DIRECT	GO:0022617~extracellular matrix disassembly	5	6.0241	0.00051879	P24347, P02751, H0Y789, P08253, P25774	13.3101	0.0322093
GOTERM_BP_DIRECT	GO:0045087~innate immune response	10	12.0482	0.000244297	P61769, P09603, P30479, P05155, P47755, P30504, P09871, Q9ULZ3, P06681, P00736	4.70496	0.033344
GOTERM_BP_DIRECT	GO:0030198~extracellular matrix organization	7	8.43373	0.000392836	P02751, P06756, O15230, A0A087WXW9, P09486, Q03692, Q92626	7.22547	0.0335108
GOTERM_BP_DIRECT	GO:0002480~antigen processing and presentation of exogenous peptide antigen via MHC class I, TAP-independent	3	3.61446	0.000829393	P61769, P30479, P30504	67.4378	0.0402969
GOTERM_BP_DIRECT	GO:0001525~angiogenesis	7	8.43373	0.000775088	P02751, P06756, O15230, Q9Y696, P08253, Q9NZ08, P23381	6.35064	0.0405488
GOTERM_BP_DIRECT	GO:0006508~proteolysis	10	12.0482	0.000729427	P24347, P00751, P08253, Q15113, P09871, P07339, P28838, P25774, P06681, P00736	4.04627	0.0413226
GOTERM_BP_DIRECT	GO:0060071~Wnt signaling pathway, planar cell polarity pathway	5	6.0241	0.00106507	A0A024RA52, P20618, P28062, P28065, Q96CW1	10.9953	0.0481079
GOTERM_BP_DIRECT	GO:0051764~actin crosslink formation	3	3.61446	0.00125911	Q14651, P21333, P13797	55.1763	0.053182
GOTERM_CC_DIRECT	GO:0048471~perinuclear region of cytoplasm	9	10.8434	0.0067703	P49746, P09603, P42224, Q9Y696, Q9H0R5, P21333, P21246, P55072, Q8NBP7	3.18212	0.0623306
GOTERM_CC_DIRECT	GO:0043202~lysosomal lumen	4	4.81928	0.00665283	P50897, O00584, P07339, P25774	10.3325	0.0645715
GOTERM_BP_DIRECT	GO:0006464~cellular protein modification process	5	6.0241	0.00173691	Q02809, P68036, P49903, O14933, P63279	9.63396	0.0685087
GOTERM_CC_DIRECT	GO:0016020~membrane	19	22.8916	0.00811512	P21926, P30504, Q8WVQ1, P21333, Q9NZ08, P20810, Q93063, P61769, P50395, P09603, P50897, P30479, P06756, P47755, Q9H0R5, P21246, Q9Y4L1, Q00839, Q15365	1.89625	0.0707097
GOTERM_BP_DIRECT	GO:0006521~regulation of cellular amino acid metabolic process	4	4.81928	0.00197415	A0A024RA52, P20618, P28062, P28065	15.8677	0.0733595
BIOCARTA	h_compPathway:Complement Pathway	4	4.81928	0.00184281	P00751, P09871, P06681, P00736	14.7727	0.0779526
GOTERM_BP_DIRECT	GO:0019882~antigen processing and presentation	4	4.81928	0.00245241	P28062, P30479, P30504, P25774	14.7137	0.0857832
KEGG_PATHWAY	hsa04612:Antigen processing and presentation	5	6.0241	0.00349058	P61769, P30479, P30504, P17066, P25774	7.80286	0.090886
KEGG_PATHWAY	hsa04512:ECM-receptor interaction	5	6.0241	0.00566223	P02751, P49746, P06756, O15230, A0A087WXW9	6.81629	0.0980139
GOTERM_MF_DIRECT	GO:0002020~protease binding	5	6.0241	0.00141121	P02751, H0Y789, P06756, Q9ULZ3, P35237	10.1914	0.103036
GOTERM_BP_DIRECT	GO:0016032~viral process	7	8.43373	0.00342009	P14324, P20618, P28062, P30479, P30504, P28065, P63279	4.73643	0.112086
KEGG_PATHWAY	hsa05133:Pertussis	5	6.0241	0.00332716	P05155, P09871, Q9ULZ3, P06681, P00736	7.9069	0.114044
KEGG_PATHWAY	hsa04145:Phagosome	6	7.22892	0.00776228	P49746, P30479, P06756, P30504, P25774, P00736	4.74414	0.114268
KEGG_PATHWAY	hsa03050:Proteasome	4	4.81928	0.00561666	A0A024RA52, P20618, P28062, P28065	10.7821	0.115549
GOTERM_BP_DIRECT	GO:0060337~type I interferon signaling pathway	4	4.81928	0.00377403	P28062, P30479, P42224, P30504	12.6446	0.117467
GOTERM_CC_DIRECT	GO:0005913~cell-cell adherens junction	6	7.22892	0.0152464	P42224, P18206, Q8NFZ8, P21333, Q15365, P20810	4.07863	0.118124
GOTERM_CC_DIRECT	GO:0030669~clathrin-coated endocytic vesicle membrane	3	3.61446	0.0146391	P21926, Q10567, Q96CW1	16.0658	0.118742
GOTERM_MF_DIRECT	GO:0005509~calcium ion binding	11	13.253	0.00221308	P24347, P49746, Q14651, P24844, Q8WVQ1, P09486, Q9HCU0, P09871, P48163, P13797, P00736	3.15833	0.1201
GOTERM_BP_DIRECT	GO:0038061~NIK/NF-kappaB signaling	4	4.81928	0.00411621	A0A024RA52, P20618, P28062, P28065	12.2614	0.122006
KEGG_PATHWAY	hsa04610:Complement and coagulation cascades	5	6.0241	0.00245502	P00751, P05155, P09871, P06681, P00736	8.59445	0.125378
GOTERM_CC_DIRECT	GO:0000139~Golgi membrane	8	9.63855	0.0170342	P61769, Q7Z7M9, P30479, Q9H0R5, P30504, P32455, Q10567, Q93063	2.97213	0.125812
GOTERM_CC_DIRECT	GO:1990357~terminal web	2	2.40964	0.0178786	Q14651, P18206	109.783	0.126548
KEGG_PATHWAY	hsa05150:Staphylococcus aureus infection	4	4.81928	0.00992362	P00751, P09871, P06681, P00736	8.78544	0.127057
KEGG_PATHWAY	hsa05146:Amoebiasis	5	6.0241	0.011255	P02751, P18206, O15230, A0A087WXW9, P35237	5.5945	0.128102
GOTERM_CC_DIRECT	GO:0005764~lysosome	5	6.0241	0.0189844	P50897, O00584, P07339, P25774, Q8NBP7	4.85766	0.128903
GOTERM_MF_DIRECT	GO:0005518~collagen binding	4	4.81928	0.00299137	P02751, Q15113, P09486, P25774	13.7244	0.129257
GOTERM_CC_DIRECT	GO:1903561~extracellular vesicle	3	3.61446	0.021308	P18206, P21926, Q99715	13.174	0.138527
GOTERM_CC_DIRECT	GO:0012507~ER to Golgi transport vesicle membrane	3	3.61446	0.0229322	P61769, P30479, P30504	12.6673	0.13855
GOTERM_CC_DIRECT	GO:1990111~spermatoproteasome complex	2	2.40964	0.0222987	P28062, P28065	87.8265	0.139585
GOTERM_BP_DIRECT	GO:0051436~negative regulation of ubiquitin-protein ligase activity involved in mitotic cell cycle	4	4.81928	0.00505227	A0A024RA52, P20618, P28062, P28065	11.3979	0.141727
KEGG_PATHWAY	hsa04510:Focal adhesion	8	9.63855	0.00144651	P02751, P49746, P18206, P06756, O15230, P24844, A0A087WXW9, P21333	4.60596	0.145966
GOTERM_CC_DIRECT	GO:0005737~cytoplasm	33	39.759	0.0274772	P42224, Q9ULZ3, P23526, Q8NBP7, A0A024RA52, P20618, P14324, P61769, Q14651, P28062, Q9Y696, P09486, Q9HCU0, P28065, P55072, P63279, P17066, O75347, P68036, Q9Y617, P49903, P21333, P35237, Q9Y4F1, O75368, P20810, P50395, Q9Y5Z4, P24534, P13797, P28838, Q15365, P23381	1.38753	0.158808
GOTERM_CC_DIRECT	GO:0005903~brush border	3	3.61446	0.0299139	Q14651, P18206, P47755	10.9783	0.161671
GOTERM_CC_DIRECT	GO:0030670~phagocytic vesicle membrane	3	3.61446	0.029	P61769, P30479, P30504	11.1644	0.161862
GOTERM_BP_DIRECT	GO:0051437~positive regulation of ubiquitin-protein ligase activity involved in regulation of mitotic cell cycle transition	4	4.81928	0.00610684	A0A024RA52, P20618, P28062, P28065	10.6481	0.16233
BIOCARTA	h_mhcPathway:Antigen Processing and Presentation	3	3.61446	0.00815855	P61769, P28062, P28065	20.1446	0.164917
GOTERM_BP_DIRECT	GO:0031145~anaphase-promoting complex-dependent catabolic process	4	4.81928	0.00679804	A0A024RA52, P20618, P28062, P28065	10.2437	0.166461
GOTERM_BP_DIRECT	GO:0046686~response to cadmium ion	3	3.61446	0.00657031	P61769, P04179, P09486	24.2776	0.167227
GOTERM_BP_DIRECT	GO:0007155~cell adhesion	8	9.63855	0.00710816	P02751, P49746, P18206, P06756, P21926, A0A087WXW9, Q99715, Q13740	3.52616	0.16753
GOTERM_CC_DIRECT	GO:0005884~actin filament	3	3.61446	0.0346518	Q14651, P21333, P13797	10.1338	0.179937
GOTERM_BP_DIRECT	GO:0050690~regulation of defense response to virus by virus	3	3.61446	0.00820063	P61769, Q10567, Q96CW1	21.6764	0.184616
GOTERM_BP_DIRECT	GO:0006956~complement activation	4	4.81928	0.00886173	P00751, P09871, P06681, P00736	9.30176	0.191856
GOTERM_CC_DIRECT	GO:0032432~actin filament bundle	2	2.40964	0.0397834	Q14651, P13797	48.7925	0.198632
BIOCARTA	h_classicPathway:Classical Complement Pathway	3	3.61446	0.0150975	P09871, P06681, P00736	14.7727	0.19998
GOTERM_BP_DIRECT	GO:0019886~antigen processing and presentation of exogenous peptide antigen via MHC class II	4	4.81928	0.0103183	P07339, Q10567, Q96CW1, P25774	8.79623	0.213322
GOTERM_MF_DIRECT	GO:0008201~heparin binding	5	6.0241	0.00734731	P02751, P49746, A0A087WXW9, Q15113, P21246	6.43331	0.216008
GOTERM_MF_DIRECT	GO:0050840~extracellular matrix binding	3	3.61446	0.00685876	P06756, P09486, Q9HCU0	23.7538	0.232772
GOTERM_BP_DIRECT	GO:0006958~complement activation, classical pathway	4	4.81928	0.0125782	P05155, P09871, P06681, P00736	8.17427	0.240063
GOTERM_MF_DIRECT	GO:0042802~identical protein binding	10	12.0482	0.00956117	P02751, P61769, P42224, P32455, P04179, P49903, P09871, Q9ULZ3, P55072, P23526	2.74854	0.242254
GOTERM_BP_DIRECT	GO:0000209~protein polyubiquitination	5	6.0241	0.0125742	A0A024RA52, P20618, P28062, P68036, P28065	5.49764	0.246695
GOTERM_BP_DIRECT	GO:0034446~substrate adhesion-dependent cell spreading	3	3.61446	0.014779	P02751, P06756, O15230	15.9721	0.249513
GOTERM_BP_DIRECT	GO:0030199~collagen fibril organization	3	3.61446	0.015529	P24347, A0A087WXW9, Q99715	15.5626	0.254395
GOTERM_BP_DIRECT	GO:0002223~stimulatory C-type lectin receptor signaling pathway	4	4.81928	0.0147237	A0A024RA52, P20618, P28062, P28065	7.70717	0.254813
GOTERM_BP_DIRECT	GO:0043488~regulation of mRNA stability	4	4.81928	0.013987	A0A024RA52, P20618, P28062, P28065	7.85683	0.256381
GOTERM_BP_DIRECT	GO:0002486~antigen processing and presentation of endogenous peptide antigen via MHC class I via ER pathway, TAP-independent	2	2.40964	0.0145793	P30479, P30504	134.876	0.259018
GOTERM_BP_DIRECT	GO:0043161~proteasome-mediated ubiquitin-dependent protein catabolic process	5	6.0241	0.0174387	A0A024RA52, P20618, P28062, P28065, P55072	4.98309	0.268792
GOTERM_BP_DIRECT	GO:0070527~platelet aggregation	3	3.61446	0.0170771	P18206, P24844, P21333	14.8034	0.269901
GOTERM_MF_DIRECT	GO:0046977~TAP binding	2	2.40964	0.0143268	P30479, P30504	137.244	0.283475
GOTERM_BP_DIRECT	GO:0043434~response to peptide hormone	3	3.61446	0.0195166	H0Y789, P42224, P09486	13.7941	0.289625
GOTERM_BP_DIRECT	GO:0010951~negative regulation of endopeptidase activity	4	4.81928	0.0214016	H0Y789, P05155, P35237, P20810	6.68804	0.30056
GOTERM_BP_DIRECT	GO:0090263~positive regulation of canonical Wnt signaling pathway	4	4.81928	0.0209432	A0A024RA52, P20618, P28062, P28065	6.74378	0.301113
GOTERM_MF_DIRECT	GO:0005178~integrin binding	4	4.81928	0.0140502	P02751, O15230, P21926, A0A087WXW9	7.84251	0.304539
GOTERM_BP_DIRECT	GO:0033591~response to L-ascorbic acid	2	2.40964	0.0241819	P04179, P09486	80.9253	0.326375
GOTERM_BP_DIRECT	GO:0034097~response to cytokine	3	3.61446	0.02668	H0Y789, P42224, P09486	11.6719	0.347231
GOTERM_MF_DIRECT	GO:0030145~manganese ion binding	3	3.61446	0.0240067	P04179, P48163, P28838	12.352	0.350651
GOTERM_MF_DIRECT	GO:0042803~protein homodimerization activity	9	10.8434	0.023615	Q02809, P09603, P42224, Q8NFZ8, P49903, Q8WVQ1, P21333, Q9ULZ3, Q93063	2.53807	0.368743
GOTERM_MF_DIRECT	GO:0019899~enzyme binding	6	7.22892	0.0219512	P68036, P42224, P32455, Q9ULZ3, P63279, P17066	3.70929	0.372562
GOTERM_BP_DIRECT	GO:0019885~antigen processing and presentation of endogenous peptide antigen via MHC class I	2	2.40964	0.0336922	P61769, Q9NZ08	57.8038	0.410549
GOTERM_BP_DIRECT	GO:1903077~negative regulation of protein localization to plasma membrane	2	2.40964	0.0336922	P32455, Q96CW1	57.8038	0.410549
GOTERM_BP_DIRECT	GO:0050852~T cell receptor signaling pathway	4	4.81928	0.0358526	A0A024RA52, P20618, P28062, P28065	5.46793	0.423535
GOTERM_BP_DIRECT	GO:0016525~negative regulation of angiogenesis	3	3.61446	0.0368799	P42224, P09486, P21246	9.78935	0.425849
GOTERM_MF_DIRECT	GO:0005138~interleukin-6 receptor binding	2	2.40964	0.0331142	Q9NZ08, Q9ULZ3	58.8188	0.426293
GOTERM_BP_DIRECT	GO:0060346~bone trabecula formation	2	2.40964	0.0384129	P49746, P08253	50.5783	0.432398
GOTERM_BP_DIRECT	GO:0090090~negative regulation of canonical Wnt signaling pathway	4	4.81928	0.0455839	A0A024RA52, P20618, P28062, P28065	4.96474	0.483559
GOTERM_BP_DIRECT	GO:0051639~actin filament network formation	2	2.40964	0.0477861	Q14651, P13797	40.4627	0.486403
GOTERM_BP_DIRECT	GO:0051607~defense response to virus	4	4.81928	0.046971	P42224, Q9H0R5, P32455, Q9ULZ3	4.90456	0.487147
GOTERM_MF_DIRECT	GO:0044822~poly(A) RNA binding	11	13.253	0.0432004	O75347, P14324, P50395, P68036, P21333, Q00839, P63279, P55072, Q15365, P20810, Q8NBP7	2.00578	0.493425
GOTERM_MF_DIRECT	GO:0016504~peptidase activator activity	2	2.40964	0.0469723	P02751, Q15113	41.1732	0.500729
