# Supplementary material for: Unraveling the Molecular Signature of Extracellular Vesicles From Endometrial-Derived Mesenchymal Stem Cells: Potential Modulatory Effects and Therapeutic Applications
Source: Front Bioeng Biotechnol. 2019 Dec 20;7:431. doi: 10.3389/fbioe.2019.00431 (PMC6932983; doi:10.3389/fbioe.2019.00431)
Supplement: Supplementary file 8 [file Table_8.XLSX]

## Sheet: Supp-Table_8A
Supplementary Table 8. Heatmaps of the functional categories expression changes and the corresponding complete set of proteins. Quantitative proteomics results were also analyzed using Systems Biology Triangle (SBT) model (García-Marqués et al., 2016) to detect coordinated protein changes in functional protein categories. Results show protein values (Zq) and functional category values (Zc), repor…
										-4	0	4	Zc,Zq scale
										0	0.051		p value scale
			EV-endMSCs			IFNγ/EV-endMSCs
		CATEGORY (Zc)	-1.29904	-0.333573	3.03789	2.05814	2.58657	4.81903	0.029249
	UniProt Accession	Gene	Zq (tag 114 vs. IS)	Zq (tag 115 vs. IS)	Zq (tag 116 vs. IS)	Zq (tag 118 vs. IS)	Zq (tag 119 vs. IS)	Zq (tag 121 vs. IS)	T-Test (p value)
GO:0002250~adaptive immune response	Q9NZ08	ERAP1	0.156987	-0.146673	0.402454	2.10924	1.997	2.063	0.00531599
	Q13740	ALCAM	-0.183485	-0.36787	1.22038	0.908327	0.69868	1.8174	0.0293404
	P25774	CTSS	-0.985679	-0.116241	1.70291	2.8291	3.23031	3.54481	0.037149
	Q6P179	ERAP2	-0.931184	0.208184	1.35394	-0.279335	4.4367	4.08789	0.134174
	Q8TD43	TRPM4	-1.45096	0.938822	0.60452	-0.538065	0.420543	1.63014	0.441287
	P04083	ANXA1	-0.701728	1.18755	-0.353737	0.239983	0.603483	0.883526	0.445608
	O75144	ICOSLG	0.409616	-0.0204226	-0.307793	1.63962	0.289913	-1.13213	0.726751
	P07711	CTSL	0.157128	-1.13591	1.86939	0.193587	-0.382818	0.981052	0.95105
	P41240	CSK	-1.48212	0.0392331	2.15556	-0.855455	-1.66812	0.747298	0.375275
	Q96FW1	OTUB1	0.67572	-0.561606	0.235015	0.405138	-0.543762	0.0299701	0.222565
	A0A075B6P5	IGKV2-28	0.311103	-0.352275	0.482623	-0.281404	-0.722799	-0.408291	0.0546807
		CATEGORY (Zc)	1.62405	-2.50072	1.50409	7.52473	3.65614	5.35873	0.0183455
GO:0045087~innate immune response	P00736	C1R	9.92235e-05	-0.493728	1.06816	3.91902	3.36062	5.07169	0.000121052
	P61769	B2M	-0.00206797	-0.953256	1.38559	3.8318	3.25714	5.77953	0.00157714
	Q9ULZ3	PYCARD	0.250039	0.44376	-0.743603	1.71221	1.77031	0.827126	0.00235432
	P30504	HLA-C	0.24192	0.0506942	-0.177838	2.53662	2.70355	2.57984	0.00296473
	P09603	CSF1	0.182604	-0.538942	1.84005	3.01668	1.39684	4.38022	0.0115726
	P09871	C1S	0.538961	-0.740729	0.528245	2.87264	2.79236	3.62936	0.0134878
	P05155	SERPING1	1.38526	-2.43961	0.884198	4.42486	1.56824	5.96732	0.0206462
	A0A0G2JIE7	C2	-0.566647	0.717234	-0.00154955	4.5176	3.64439	3.44612	0.0277487
	P06681	C2	-0.554444	0.818318	-0.214131	3.2337	2.87861	3.24397	0.0279279
	P30479	HLA-B	-0.140524	0.0223994	-0.105336	3.03788	1.81012	3.62215	0.0374656
	Q29963	HLA-C	0.78605	-0.417999	-0.235885	2.73345	3.47197	2.16464	0.0427541
	B4DPQ0	C1R	-1.09626	0.814723	0.559275	0.64315	1.57638	1.88684	0.0459464
	A0A087X0I2	CFI	1.63536	-1.10965	-0.615065	2.63844	0.370437	1.94972	0.0678253
	Q9NZP8	C1RL	0.170108	-0.177883	0.229146	1.89908	3.28595	5.69991	0.0813759
	P30475	HLA-B	-0.306888	0.46256	-0.0411565	0.836449	1.99483	3.3534	0.100438
	Q9C000	NLRP1	0.918129	-0.354234	-0.491323	1.19867	1.11681	0.640675	0.113154
	P05156	CFI	1.72677	-1.25603	-0.739921	1.87243	-0.0611493	0.432183	0.13656
	P0C0L5	C4B	-0.616707	0.761925	0.0447443	4.36065	1.21128	3.54116	0.155344
	P0C0L4	C4A	-1.03855	1.18614	-0.209808	4.05945	1.41056	5.7864	0.170041
	P30501	HLA-C	-2.18861	1.55728	0.221067	-1.54223	3.07019	0.255235	0.23042
	P30481	HLA-B	-0.588228	1.06421	-0.60278	-0.620817	3.71805	0.290655	0.275383
	P30464	HLA-B	0.486734	-0.488687	-0.0284544	0.19967	0.753611	2.85849	0.297116
	P05067	APP	0.572294	-0.951877	0.335653	0.43134	-0.202302	0.692804	0.337931
	H7BY55	CD55	0.923954	0.52866	-2.10331	0.487589	1.42405	-1.19806	0.414793
	P04083	ANXA1	-0.701728	1.18755	-0.353737	0.239983	0.603483	0.883526	0.445608
	P14174	MIF	0.167589	0.484159	-0.616205	0.375914	0.87626	-0.771474	0.453602
	P30487	HLA-B	0.372783	-0.567142	0.690309	3.35727	-0.337897	0.134646	0.495918
	A0A140T953	HLA-B	0.372783	-0.567142	0.690309	3.35727	-0.337897	0.134646	0.495918
	Q92985	IRF7	1.1236	0.0371621	-1.56758	0.668727	1.76979	-1.29732	0.506658
	P09429	HMGB1	0.701948	-0.704478	0.529181	0.385841	0.894756	0.572001	0.530559
	Q96PD5	PGLYRP2	1.0483	-0.439977	-0.516458	0.662639	0.198525	-0.112343	0.552913
	Q9NPH3	IL1RAP	0.0639961	-0.214074	0.71047	0.523937	-0.197242	0.483033	0.719594
	P10321	HLA-C	-1.7833	-0.326951	2.57552	-1.367	-0.879389	3.02922	0.778366
	P01834	IGKC	0.955488	-1.21302	0.496169	0.499727	-0.694477	0.706802	0.781298
	P01859	IGHG2	1.16264	-1.12824	0.323671	0.883053	-0.256821	0.0652679	0.797564
	Q15366	PCBP2	-0.108462	1.04562	-1.35269	-0.0854919	0.673887	-0.769579	0.804457
	F8VRH0	PCBP2	-0.108462	1.04562	-1.35269	-0.0854919	0.673887	-0.769579	0.804457
	P03950	ANG	-0.995589	1.19109	-0.478099	-0.227995	0.0129707	0.432758	0.827579
	A0A0B4J2B5	IGHV3OR16-9	1.08316	-0.872566	-0.271933	0.860693	-0.239042	-0.5101	0.859895
	P01857	IGHG1	1.9877	-1.87372	-0.15647	1.12705	-0.429782	-0.381139	0.877914
	P62987	UBA52	1.92742	-2.35257	0.546319	1.61173	0.510684	-1.41118	0.902183
	Q13263	TRIM28	-0.32472	0.254398	0.421255	0.127217	0.291425	-0.0248427	0.961093
	Q07021	C1QBP	1.12847	-1.10527	0.179216	1.17999	0.0964492	-1.04702	0.990925
	P17931	LGALS3	1.03572	-0.862516	-0.0401058	-0.0741662	0.468458	-0.262235	0.999655
	P18465	HLA-B	-0.872743	0.267956	1.06433	-0.530825	-1.3745	2.20188	0.953574
	P01860	IGHG3	0.89725	-0.658796	-0.124841	0.15789	-0.206284	-0.0827128	0.8372
	P01861	IGHG4	1.57665	-1.43195	-0.102421	0.825457	-0.523804	-0.662985	0.821447
	C9IZP8	C1S	-0.820422	0.973409	-0.21617	-0.0695216	0.428199	-0.755679	0.820448
	P26583	HMGB2	-1.45512	1.52305	-0.417951	-1.23536	-0.500263	0.572408	0.792571
	P26022	PTX3	2.50787	-2.91966	-0.0882687	0.17483	-1.18552	-0.758787	0.754333
	A1L4H1	SSC5D	-1.27913	0.787299	0.730767	-0.914188	-1.60903	0.875117	0.551332
	Q9BUD6	SPON2	0.501069	-0.00243971	-0.577202	-0.151715	0.813004	-2.47064	0.537901
	P30530	AXL	0.693751	-0.493195	-0.0328051	0.362909	-0.28754	-0.528069	0.4315
	Q15399	TLR1	-1.96132	0.204201	2.20346	-1.60555	-2.12277	1.63901	0.395245
	P41240	CSK	-1.48212	0.0392331	2.15556	-0.855455	-1.66812	0.747298	0.375275
	P0DOY2	IGLC2	0.588641	-0.474624	0.311193	0.45411	-0.483435	0.304361	0.357721
	P08779	KRT16	3.89099	-2.54546	-0.854748	0.602701	-2.1953	-1.98084	0.328304
	P52907	CAPZA1	-0.166339	-0.0580291	0.777604	-0.120254	-0.316715	-0.276487	0.326804
	Q9BWS9	CHID1	-0.177327	0.0131353	0.595256	-0.353397	-0.0402536	-0.680876	0.325808
	P01876	IGHA1	0.246186	0.430057	-0.697439	-0.459449	-0.348885	-0.503119	0.303051
	P10909	CLU	0.282745	-2.0577	2.65126	-1.72214	-1.87496	-0.433135	0.230902
	P08174	CD55	0.914449	0.427683	-1.59892	0.0295018	0.373553	-2.00988	0.202382
	Q9BZY9	TRIM31	-1.30603	-0.167097	2.11583	-1.69846	-1.8601	-0.343681	0.128681
	P0CF74	IGLC6	0.26338	-0.305897	0.482633	0.179261	-0.507104	0.424074	0.12075
	Q96J02	ITCH	-2.36198	2.95665	-3.0168	-4.14986	-3.38922	-6.12421	0.109547
	P35247	SFTPD	-0.825	0.861492	0.110059	-2.16733	-1.13099	-2.09283	0.0191254
	P47755	CAPZA2	0.256197	-0.129729	0.289947	-0.342898	-0.620012	-0.349098	0.0059

## Sheet: Supp-Table_8B
										-4	0	4	Zc,Zq scale
										0	0.051		p value scale
			EV-endMSCs			IFNγ/EV-endMSCs
		CATEGORY (Zc)	1.66154	-2.35746	1.19929	7.24067	2.83317	4.80635	0.0154726
	UniProt Accession	Gene	Zq (tag 114 vs. IS)	Zq (tag 115 vs. IS)	Zq (tag 116 vs. IS)	Zq (tag 118 vs. IS)	Zq (tag 119 vs. IS)	Zq (tag 121 vs. IS)	T-Test (p value)
GO:0006958~complement activation	P00736	C1R	9.92235e-05	-0.493728	1.06816	3.91902	3.36062	5.07169	0.000121052
	P09871	C1S	0.538961	-0.740729	0.528245	2.87264	2.79236	3.62936	0.0134878
	P05155	SERPING1	1.38526	-2.43961	0.884198	4.42486	1.56824	5.96732	0.0206462
	A0A0G2JIE7	C2	-0.566647	0.717234	-0.00154955	4.5176	3.64439	3.44612	0.0277487
	P06681	C2	-0.554444	0.818318	-0.214131	3.2337	2.87861	3.24397	0.0279279
	B4DPQ0	C1R	-1.09626	0.814723	0.559275	0.64315	1.57638	1.88684	0.0459464
	A0A087X0I2	CFI	1.63536	-1.10965	-0.615065	2.63844	0.370437	1.94972	0.0678253
	Q9NZP8	C1RL	0.170108	-0.177883	0.229146	1.89908	3.28595	5.69991	0.0813759
	P05156	CFI	1.72677	-1.25603	-0.739921	1.87243	-0.0611493	0.432183	0.13656
	P0C0L5	C4B	-0.616707	0.761925	0.0447443	4.36065	1.21128	3.54116	0.155344
	P0C0L4	C4A	-1.03855	1.18614	-0.209808	4.05945	1.41056	5.7864	0.170041
	H7BY55	CD55	0.923954	0.52866	-2.10331	0.487589	1.42405	-1.19806	0.414793
	P01834	IGKC	0.955488	-1.21302	0.496169	0.499727	-0.694477	0.706802	0.781298
	P01859	IGHG2	1.16264	-1.12824	0.323671	0.883053	-0.256821	0.0652679	0.797564
	A0A0B4J2B5	IGHV3OR16-9	1.08316	-0.872566	-0.271933	0.860693	-0.239042	-0.5101	0.859895
	P01857	IGHG1	1.9877	-1.87372	-0.15647	1.12705	-0.429782	-0.381139	0.877914
	Q07021	C1QBP	1.12847	-1.10527	0.179216	1.17999	0.0964492	-1.04702	0.990925
	P01860	IGHG3	0.89725	-0.658796	-0.124841	0.15789	-0.206284	-0.0827128	0.8372
	P01861	IGHG4	1.57665	-1.43195	-0.102421	0.825457	-0.523804	-0.662985	0.821447
	C9IZP8	C1S	-0.820422	0.973409	-0.21617	-0.0695216	0.428199	-0.755679	0.820448
	P01619	IGKV3-20	0.285247	-0.360476	0.521328	-0.141181	-0.367229	0.583463	0.502943
	P01024	C3	-2.43998	1.12809	1.67036	-1.70772	-1.93437	1.04368	0.468265
	P0DOY2	IGLC2	0.588641	-0.474624	0.311193	0.45411	-0.483435	0.304361	0.357721
	P01876	IGHA1	0.246186	0.430057	-0.697439	-0.459449	-0.348885	-0.503119	0.303051
	P10909	CLU	0.282745	-2.0577	2.65126	-1.72214	-1.87496	-0.433135	0.230902
	P08174	CD55	0.914449	0.427683	-1.59892	0.0295018	0.373553	-2.00988	0.202382
	P0CF74	IGLC6	0.26338	-0.305897	0.482633	0.179261	-0.507104	0.424074	0.12075

## Sheet: Supp-Table_8C
										-4	0	4	Zc,Zq scale
										0	0.051		p value scale
			EV-endMSCs			IFNγ/EV-endMSCs
		CATEGORY (Zc)	-0.453273	0.887224	0.341106	7.4929	8.86841	10.5422	0.00725446
	UniProt Accession	Gene	Zq (tag 114 vs. IS)	Zq (tag 115 vs. IS)	Zq (tag 116 vs. IS)	Zq (tag 118 vs. IS)	Zq (tag 119 vs. IS)	Zq (tag 121 vs. IS)	T-Test (p value)
GO:0060333~interferon-gamma-mediated signaling pathway	P32455	GBP1	-0.114076	0.586436	-0.562222	5.28875	5.72368	4.4668	0.000457575
	P61769	B2M	-0.00206797	-0.953256	1.38559	3.8318	3.25714	5.77953	0.00157714
	P30504	HLA-C	0.24192	0.0506942	-0.177838	2.53662	2.70355	2.57984	0.00296473
	P42224	STAT1	-0.736079	0.2738	1.07311	1.26148	2.32637	2.49859	0.0118524
	P01891	HLA-A	0.114367	0.0604966	0.191852	1.47524	2.28771	2.02974	0.0186502
	P30479	HLA-B	-0.140524	0.0223994	-0.105336	3.03788	1.81012	3.62215	0.0374656
	Q29963	HLA-C	0.78605	-0.417999	-0.235885	2.73345	3.47197	2.16464	0.0427541
	P18462	HLA-A	1.03865	-0.640667	-0.704756	2.79244	2.25932	3.40989	0.0503154
	P05362	ICAM1	0.446258	0.317557	-1.02428	2.62049	1.09685	1.02632	0.064586
	P16188	HLA-A	1.19405	-0.721595	-0.931049	3.20608	1.76357	3.8144	0.0674494
	P32456	GBP2	-0.312939	1.00838	-0.877077	0.319435	2.88043	0.504406	0.0694647
	P13284	IFI30	-0.160658	0.915526	-0.694972	3.37154	2.54049	4.76378	0.0854626
	P16190	HLA-A	0.743951	0.483631	-2.10024	2.07808	1.29106	0.438514	0.0930608
	P30475	HLA-B	-0.306888	0.46256	-0.0411565	0.836449	1.99483	3.3534	0.100438
	P30455	HLA-A	-0.00465379	0.53506	-0.48906	1.26352	4.36452	0.62119	0.143369
	P30501	HLA-C	-2.18861	1.55728	0.221067	-1.54223	3.07019	0.255235	0.23042
	P30481	HLA-B	-0.588228	1.06421	-0.60278	-0.620817	3.71805	0.290655	0.275383
	P30464	HLA-B	0.486734	-0.488687	-0.0284544	0.19967	0.753611	2.85849	0.297116
	P30487	HLA-B	0.372783	-0.567142	0.690309	3.35727	-0.337897	0.134646	0.495918
	A0A140T953	HLA-B	0.372783	-0.567142	0.690309	3.35727	-0.337897	0.134646	0.495918
	Q92985	IRF7	1.1236	0.0371621	-1.56758	0.668727	1.76979	-1.29732	0.506658
	P10321	HLA-C	-1.7833	-0.326951	2.57552	-1.367	-0.879389	3.02922	0.778366
	P18465	HLA-B	-0.872743	0.267956	1.06433	-0.530825	-1.3745	2.20188	0.953574
	P16070	CD44	1.58979	-3.75116	2.44354	0.531597	-1.22982	0.517985	0.920174
	P13591	NCAM1	-0.735354	1.56453	-1.26184	-0.9139	0.0680377	0.0906342	0.908033
	H0YGP3	OASL	-1.24071	1.3047	-0.321174	-2.08741	1.61198	-1.76465	0.327147
	Q13557	CAMK2D	-1.02301	0.551883	0.772356	-1.38962	0.391394	-0.700654	0.243477
	Q9BZY9	TRIM31	-1.30603	-0.167097	2.11583	-1.69846	-1.8601	-0.343681	0.128681
		CATEGORY (Zc)	1.24802	1.0441	-2.34375	3.94147	4.45671	2.59642	0.0308743
GO:0000502~proteasome complex	P40306	PSMB10	-0.523992	0.620781	0.11615	3.06644	3.73947	3.51086	0.00164663
	P28062	PSMB8	0.363474	0.459679	-1.12347	1.02701	1.19108	-0.349186	0.00198219
	A0A024RA52	PSMA2	0.13391	0.242015	-0.37336	1.30301	1.12601	0.889155	0.0104447
	P28065	PSMB9	0.693897	0.100229	-0.822268	2.33957	2.76824	2.498	0.0347752
	P20618	PSMB1	0.205477	0.123592	-0.222664	0.834141	0.881048	1.02598	0.0432765
	Q06323	PSME1	-0.774601	1.31015	-0.478707	2.85961	2.7764	2.4624	0.0524404
	Q9UL46	PSME2	-0.423584	1.24376	-0.975861	2.98815	3.26183	3.89887	0.053101
	P60900	PSMA6	0.118294	0.28713	-0.208566	0.882726	1.10397	0.0890773	0.0629436
	P28066	PSMA5	1.03849	-0.245035	-0.914004	1.60325	1.65088	0.709063	0.0785959
	P25789	PSMA4	0.579818	-0.137258	-0.304046	1.07104	1.34623	0.364929	0.10209
	O14818	PSMA7	0.257414	0.619094	-0.999207	0.890278	1.0266	0.394704	0.112823
	P61289	PSME3	-0.389021	0.515519	0.0724756	0.58878	0.819458	0.450096	0.122168
	P25788	PSMA3	0.814053	-0.441532	-0.0211297	1.04311	1.12516	0.685449	0.166756
	P49721	PSMB2	-0.00742623	0.811093	-0.928673	0.617367	0.82636	0.318423	0.218925
	A0A0G2JHI2	PSMB9	1.22169	-0.657667	-0.702685	1.32807	0.914437	-0.108734	0.220873
	A0A0G2JJQ0	PSMB9	1.22169	-0.657667	-0.702685	1.32807	0.914437	-0.108734	0.220873
	P25786	PSMA1	1.60483	-1.19444	-0.605048	1.80513	1.17706	0.191374	0.225137
	H0YMI6	PSMA4	1.78824	-0.752565	-1.68749	1.44407	1.77716	0.183406	0.260071
	P55036	PSMD4	-0.292158	-0.203347	1.05458	0.418996	1.4454	0.544108	0.428001
	P28070	PSMB4	0.0305071	0.519867	-0.636707	0.35945	0.187525	1.69698	0.434726
	P49720	PSMB3	0.821435	0.0751797	-1.80858	0.41935	0.261492	-0.191328	0.517467
	P54727	RAD23B	0.379812	0.254906	-0.678923	0.126558	0.479266	-0.290411	0.596989
	O00487	PSMD14	-0.236868	0.94046	-0.85974	0.217936	-0.933416	0.929936	0.918668
	Q15008	PSMD6	0.111696	0.322243	-0.370955	-0.150201	0.0156806	0.105457	0.91485
	H7C531	PSMD6	0.111696	0.322243	-0.370955	-0.150201	0.0156806	0.105457	0.91485
	Q99460	PSMD1	-0.580291	0.769835	-0.123448	-0.107285	-0.165524	0.0788237	0.859336
	O43242	PSMD3	-1.0106	0.413321	0.971007	-0.347571	-0.485201	0.752533	0.76965
	O75832	PSMD10	0.776377	-1.39441	1.17727	0.121906	-0.355499	-0.14041	0.700843
	B1AJY5	PSMD10	0.776377	-1.39441	1.17727	0.121906	-0.355499	-0.14041	0.700843
	O43396	TXNL1	0.316304	0.223539	-0.31646	-0.259	0.394191	-0.311567	0.615397
	P04792	HSPB1	0.345183	0.365142	-0.866152	-0.329456	0.947566	-1.68717	0.564895
	Q99436	PSMB7	0.47169	0.851722	-0.0795764	0.44134	0.380126	-2.24923	0.305367
	P28072	PSMB6	0.15336	0.412136	-0.348996	-1.45715	-0.846083	-0.072872	0.27419
	Q16401	PSMD5	-1.21226	1.38117	-0.30272	-1.30985	-2.13247	-1.42209	0.25962
	P28074	PSMB5	0.338934	0.49618	-0.94036	-0.777243	-0.180002	-1.39059	0.0621086
	P55072	VCP	0.0695154	0.591733	-0.677864	-1.40633	-0.161429	-2.06686	0.0338772
